# Supplementary material for: Coupling biocatalysis and click chemistry: one-pot two-step convergent synthesis of enantioenriched 1,2,3-triazole-derived diols
Source: Royal Society of Chemistry journal article supplement (doi:10.1039/c3cc38674k), 2013-01-01

# **Coupling Biocatalysis and Click Chemistry: One-pot Two-step Convergent Synthesis of Enantioenriched 1,2,3-Triazole-Derived Diols**

Aníbal Cuetos, Fabricio R. Bisogno, Iván Lavandera\* and Vicente Gotor\*

## **Supporting Information (page S1 of S52)**

### **Table of Contents**

1. General (p. S2)
2. Experimental procedures (p. S3)
3. Analytics (p. S19)
4. Supporting references (p. S22)
5. Compound NMR spectra (p. S23)

## 1. General.

Ketone **1a** and alcohol **2a** and **2b** were purchased from commercial sources. All other reagents and solvents were of the highest quality available. Glucose dehydrogenase (GDH 002, 30 U mg<sup>-1</sup>), ADH-A from *Rhodococcus ruber* (20 U mg<sup>-1</sup>), and LBADH from *Lactobacillus brevis* (3.7 U μL<sup>-1</sup>) were obtained from Jülich-Codexis. LKADH from *Lactobacillus kefir* (0.42 U mg<sup>-1</sup>) was obtained from Fluka. Overexpressed ADHs from *Rhodococcus ruber* (ADH-A), from *Thermoanaerobium* sp. (ADH-T), and *Thermoanaerobacter ethanolicus* (TesADH) have been obtained from Prof. Wolfgang Kroutil at the University of Graz following the methodology previously described.<sup>1</sup> 1 unit (U) of ADH reduces 1.0 μM of acetophenone to 1-phenylethanol (for ADH-A, LBADH or LKADH) and 2-octanone to 2-octanol (for TesADH and ADH-T) per minute at pH 7.5 and 30°C in the presence of NAD(P)H. Flash chromatography was performed using silica gel 60 (230-400 mesh). IR spectra were recorded on a Perkin-Elmer 1720-X infrared Fourier transform spectrophotometer on NaCl pellets. <sup>1</sup>H-, <sup>13</sup>C-NMR, and DEPT were obtained using a Bruker DPX-300 (<sup>1</sup>H, 300.13 MHz and <sup>13</sup>C, 75.5 MHz) spectrometer for routine experiments. The chemical shifts (δ) are given in ppm and the coupling constants (*J*) in Hertz (Hz). ESI<sup>+</sup> mode was used to record mass spectra (MS) and ESI-TOF for HRMS. Gas chromatography (GC) analyses were performed on a Hewlett Packard 6890 Series II chromatograph. HPLC analyses were performed with Hewlett Packard 1100 LC liquid chromatograph. The chromatograms shown for each enantioenriched diol derivative correspond to the worked-up reaction crude and were not subjected to any preparative chromatographic separation ensuring that all produced isomers were considered. Optical rotations were measured using a Perkin-Elmer 241 polarimeter and are quoted in units of 10<sup>-1</sup> deg cm<sup>2</sup> g<sup>-1</sup>.

## 2. Experimental procedures

### 2.1. General procedure for the synthesis of ketones **1b** and **1e**

To a solution of the alcohol **2b** or **2e** (3.3 mmol) in acetone (15 mL) at 0°C, Jones' reagent (CrO<sub>3</sub>, 430 mg, 6.3 mmol, 1.5 equiv. in a mixture of 333 µL of H<sub>2</sub>SO<sub>4</sub> conc. and 1 mL of H<sub>2</sub>O) was added dropwise and shaken at r.t. for 1 hour. After completion, the reaction was filtered over celite and the solvent was evaporated under reduced pressure. The residue was extracted with diethyl ether (2 x 15 mL). The organic layers were pooled together, dried over Na<sub>2</sub>SO<sub>4</sub> and evaporated affording the ketone **1b** or **1e** as yellow oil (75-80% yield). Compound **1b**<sup>2</sup> exhibited physical and spectral properties in accordance with those reported.

#### *1-azido-octan-2-one (1e)*

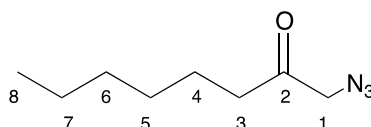

Yellow oil. <sup>1</sup>H-NMR (300 MHz, CDCl<sub>3</sub>) δ 0.87 (*t*, 3H, H<sub>8</sub>, <sup>3</sup>J<sub>HH</sub> 6.5 Hz), 1.28 (*m*, 6H, H<sub>5</sub>+H<sub>6</sub>+H<sub>7</sub>), 1.60 (*m*, 2H, H<sub>4</sub>), 2.43 (*t*, 2H, H<sub>3</sub>, <sup>3</sup>J<sub>HH</sub> 7.4 Hz), 3.93 (*s*, 2H, H<sub>1</sub>). <sup>13</sup>C-NMR (75 MHz, CDCl<sub>3</sub>) δ 13.9 (CH<sub>3</sub>, C<sub>8</sub>), 22.3 (CH<sub>2</sub>, C<sub>7</sub>), 23.3 (CH<sub>2</sub>, C<sub>6</sub>), 28.7 (CH<sub>2</sub>, C<sub>5</sub>), 31.4 (CH<sub>2</sub>, C<sub>4</sub>), 39.9 (CH<sub>2</sub>, C<sub>3</sub>), 57.3 (CH<sub>2</sub>, C<sub>1</sub>), 204.5 (C, C<sub>2</sub>). MS (ESI<sup>+</sup>, *m/z*): 192 [(M+Na)<sup>+</sup>, 100%]. HRMS (ESI<sup>+</sup>) calcd for C<sub>8</sub>H<sub>15</sub>N<sub>3</sub>ONa (M+Na)<sup>+</sup>: 192.1113; found: 192.1105.

### 2.2. General procedure for the synthesis of ketones **1c**, **1d** and **1f**

To a solution of 2-bromoacetophenone, 2-bromo-2'-acetonaphthone, 2-bromo-4'-nitroacetophenone or 2-bromo-4'-hydroxyacetophenone (10 mmol) in a mixture of H<sub>2</sub>O:ethanol (1:2, total volume 12 mL), sodium azide (2 equiv., **CAUTION: sodium**

**azide must be carefully handled, risk of explosion**) was added. The reaction was stirred at room temperature, and after completion, the solvent was evaporated and the residue was extracted with dichloromethane (2 x 20 mL). The organic layers were pooled together, dried over Na<sub>2</sub>SO<sub>4</sub> and evaporated affording ketone **1c** (yellow oil), **1d**, **1f** (brown solids) or **1g** (white solids) (95-99% yield). Compounds **1c**<sup>2</sup>, **1d**<sup>3</sup>, **1f**<sup>4</sup> and **1g**<sup>1</sup> exhibited physical and spectral properties in accordance with those reported.

### 2.3. General procedure for the synthesis of alcohols **2c**, **2d**, **2f** or **2g**

To a solution of ketone **1c**, **1d**, **1f** or **1g** (9.3 mmol) in ethanol (10 mL) at 0°C, NaBH<sub>4</sub> (2 equiv.) was carefully added. After completion, the usual acid work-up (HCl 1N) was carried out. The crude was concentrated under reduced pressure and then the residue was extracted with ethyl acetate (2 x 20 mL). The organic layers were pooled together, dried over Na<sub>2</sub>SO<sub>4</sub> and evaporated affording alcohols **2c** (yellow oil), **2d** (brown solid), **2f** or **2g** (brown oil) (85-93% yield). Compounds **2c**<sup>2</sup>, **2d**<sup>5</sup>, **2f**<sup>6</sup> and **2g**<sup>1</sup> exhibited physical and spectral properties in accordance with those reported.

### 2.4. General procedure for the synthesis of alcohol **2e**

1-Octene (6.0 mmol, 1 equiv.) reacted with *N*-bromosuccinimide (NBS, 1.3 g, 7.2 mmol, 1.2 equiv.) and ammonium acetate (NH<sub>4</sub>Ac, 0.6 mmol, 0.1 equiv.) in a mixture of acetone (6 mL) and water (6 mL).<sup>7</sup> The reaction mixture was stirred at room temperature overnight. Later, 3 mL of water were added followed by extraction with CH<sub>2</sub>Cl<sub>2</sub> (3 x 5 mL). The organic layers were combined and dried over Na<sub>2</sub>SO<sub>4</sub>. The solvent was concentrated under vacuo and the residue subjected to *flash* chromatography (petroleum ether / CH<sub>2</sub>Cl<sub>2</sub>, 1:1) obtaining *rac*-1-bromooctan-2-ol (73% isolated yield).

Then, to a solution of this bromohydrin (4 mmol) in DMF (6 mL) and water (1 mL), sodium azide (8.2 mmol, 2 equiv., **CAUTION: sodium azide must be carefully handled, risk of explosion**) was added and shaken at 70°C for 24 hours. After completion, the reaction was extracted with diethyl ether (3 x 10 mL). The organic layers were pooled together, dried over Na<sub>2</sub>SO<sub>4</sub> and evaporated affording the alcohol **2e** as yellow oil (65% isolated yield). Compound **2e**<sup>8</sup> exhibited physical and spectral properties in accordance with those reported.

#### 2.5. ADH-catalysed reduction of ketones **1a-g** by ADH-A, CPADH or LBADH

In a 1.5 mL Eppendorf vial, ADH-A, CPADH or LBADH (3 U) was added in phosphate buffer (600 µL, 50 mM, pH 7.5, 1 mM NADH for ADH-A and CPADH, or 1 mM NADPH and 1 mM MgCl<sub>2</sub> for LBADH), and mixed with 2-propanol (32 µL, 5% v v<sup>-1</sup>) and the corresponding ketone **1a-g** (20 mM). Reactions were shaken at 30°C and 250 rpm for 24 h and stopped by extraction with ethyl acetate (2 x 0.5 mL). The organic layer was separated by centrifugation (2 min, 13000 rpm) and dried over Na<sub>2</sub>SO<sub>4</sub>. Conversions and enantiomeric excess of the corresponding alcohols (see Tables S1 and S2) were determined by GC or HPLC (see Tables S3 and S4). Conversions for substrate **1f** and **1g** were determined by <sup>1</sup>H-NMR.

#### 2.6. ADH-catalysed reduction of ketones **1a-e** by LKADH

In a 1.5 mL Eppendorf vial, LKADH (3 U) was added in phosphate buffer (600 µL, 50 mM, pH 7.5, 1 mM NADPH) and mixed with 5 U of GDH and glucose (40 mM) with the corresponding ketone **1a-e** (20 mM). Reactions were shaken at 30°C and 250 rpm for 24 h and stopped by extraction with ethyl acetate (2 x 0.5 mL). The organic layer was separated by centrifugation (2 min, 13000 rpm) and dried over Na<sub>2</sub>SO<sub>4</sub>.

Conversions and enantiomeric excess of the corresponding alcohols (see Tables S1 and S2) were determined by GC or HPLC (see Tables S3 and S4).

*2.7. ADH-catalysed reduction of ketones **1a-g** by E. coli/ADH-A, E. coli/TesADH or E. coli/ADH-T*

In a 1.5 mL Eppendorf vial, 20 mg of *E. coli*/ADH-A, *E. coli*/TesADH or *E. coli*/ADH-T in phosphate buffer (600  $\mu$ L, 50 mM, pH 7.5, 1 mM NADH for ADH-A, or 1 mM NADPH for TesADH and ADH-T) were mixed with 2-propanol (32  $\mu$ L, 5% v v<sup>-1</sup>) and the corresponding ketone **1a-g** (20 mM). Reactions were shaken at 30°C and 250 rpm for 24 h and stopped by extraction with ethyl acetate (2 x 0.5 mL). The organic layer was separated by centrifugation (2 min, 13000 rpm) and dried over Na<sub>2</sub>SO<sub>4</sub>. Conversions and enantiomeric excess of the corresponding alcohols (see Tables S1 and S2) were determined by GC or HPLC (see Tables S3 and S4). Conversions for substrate **1f** and **1g** were determined by <sup>1</sup>H-NMR.

**Table S1** Bioreduction of alkynones **1a** and **1b** employing ADHs (*t*= 24 h)

| ADH                   | <b>1a<sup>a</sup></b> |                 | <b>1b<sup>a,b</sup></b> |                 |
|-----------------------|-----------------------|-----------------|-------------------------|-----------------|
|                       | <i>c</i>              | <i>ee</i>       | <i>c</i>                | <i>ee</i>       |
| <i>E.coli</i> /ADH-A  | >99                   | 96 ( <i>S</i> ) | >99                     | 98 ( <i>R</i> ) |
| <i>E.coli</i> /ADH-T  | >99                   | 96 ( <i>S</i> ) | >99                     | 96 ( <i>R</i> ) |
| <i>E.coli</i> /TesADH | >99                   | 76 ( <i>S</i> ) | 99                      | 90 ( <i>R</i> ) |
| LBADH                 | >99                   | 64 ( <i>R</i> ) | >99                     | 99 ( <i>S</i> ) |
| LKADH                 | 82                    | 54 ( <i>R</i> ) | >99                     | 99 ( <i>S</i> ) |

<sup>a</sup> Determination of conversion by GC. <sup>b</sup> Change in Cahn-Ingold-Prelog (CIP) priority.

**Table S2** Bioreduction of  $\alpha$ -azido ketones **1c**, **1d**, **1e**, **1f** and **1g** employing ADHs ( $t=24$  h)

| ADH                   | <b>1c</b> <sup>a,b</sup> |                     | <b>1d</b> <sup>a,b</sup> |                     | <b>1e</b> <sup>a,b</sup> |                     | <b>1f</b> <sup>b,c</sup> |                     | <b>1g</b> <sup>b,c</sup> |                     |
|-----------------------|--------------------------|---------------------|--------------------------|---------------------|--------------------------|---------------------|--------------------------|---------------------|--------------------------|---------------------|
|                       | <i>c</i>                 | <i>ee</i>           |
| <i>E.coli</i> /ADH-A  | >99                      | >99<br>( <i>R</i> ) |
| <i>E.coli</i> /ADH-T  | >99                      | >99<br>( <i>R</i> ) | 0                        | n.d.                | >99                      | >99<br>( <i>R</i> ) | >99                      | >99<br>( <i>R</i> ) | 0                        | n.d.                |
| <i>E.coli</i> /TesADH | 33                       | 11 ( <i>R</i> )     | 0                        | n.d.                | 75                       | 92 ( <i>R</i> )     | n.d.                     | n.d.                | 0                        | n.d.                |
| LBADH                 | >99                      | >99 ( <i>S</i> )    | 6                        | >99 ( <i>S</i> )    | >99                      | >99 ( <i>S</i> )    | >99                      | >99 ( <i>S</i> )    | 5                        | >99 ( <i>S</i> )    |
| LKADH                 | >99                      | 98 ( <i>S</i> )     | 54                       | 50 ( <i>S</i> )     | >99                      | >99 ( <i>S</i> )    | n.d.                     | n.d.                | n.d.                     | n.d.                |

<sup>a</sup> Determination of conversion by GC. <sup>b</sup> Change in Cahn-Ingold-Prelog (CIP) priority.

<sup>c</sup> Determination of conversion by <sup>1</sup>H-NMR. n.d. not determined.

## 2.8. General procedure for the synthesis of *rac*-1,2,3-triazole-derived diols *syn*- and *anti*-**3ac-bf**

The cycloaddition of the alkynyl derivatives **2a-b** (1 mmol) and the azido compounds **2c-g** (1 mmol) in a mixture water : <sup>t</sup>BuOH (20 mL : 20 mL) was catalysed employing a magnetic stirrer rolled on Cu wire and CuSO<sub>4</sub> in a catalytic amount (0.1 mmol). The reaction was shaken at 60-80°C for 24 h. After completion, the crude was concentrated under reduced pressure and then the residue was extracted with ethyl acetate (2 x 20 mL). The organic layers were pooled together, dried over Na<sub>2</sub>SO<sub>4</sub>, concentrated under vacuo and the residue was subjected to *flash* chromatography (CH<sub>2</sub>Cl<sub>2</sub> / MeOH, 9:1) obtaining the *rac*-1,2,3-triazole-derived diols *syn*- and *anti*-**3ac-bf** as white solids (74-92% isolated yield). The magnetic stirrer with the Cu wire could be reused several times after an acidic wash with HCl 2N during 5 minutes.

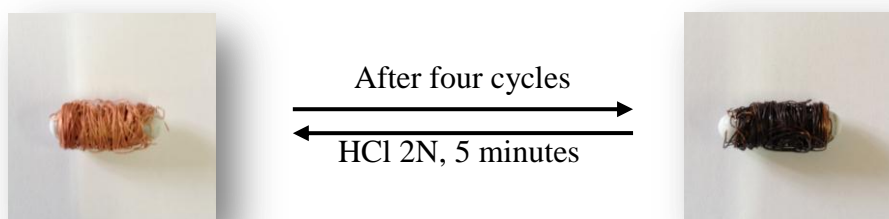

*2.9. General procedure for the one-pot two-step biosynthesis of chiral 1,2,3-triazole-derived diols **3ac-bf** using 2-propanol as cofactor regeneration system*

In a 5-mL closed-cap test tube, ADH-A, CPADH, or LBADH (5 U) or *E. coli*/ADH-A, *E. coli*/TesADH or *E. coli*/ADH-T (30 mg) were added in phosphate buffer (1.2 mL, 50 mM, pH 7.5, 1 mM NADH for ADH-A and CPADH, or 1 mM NADPH for LBADH, TesADH and ADH-T, and 1 mM MgCl<sub>2</sub> for LBADH) mixed with 2-propanol (64 µL, 5% v v<sup>-1</sup>) and the corresponding alkynyl derivative **1a-b** and the azido derivative **1c-g** (24 µL, 1 M in DMSO, final concentration: 20 mM of each substrate). Reactions were shaken at 30°C and 250 rpm for 24 h. Then, a magnetic stirrer rolled on Cu wire and CuSO<sub>4</sub> (25 µL of a solution in water of 100 mM, 0.1 equiv.) were added and stirred at 60-80°C for 24 h. The reaction was stopped by extraction with ethyl acetate (2 x 1 mL). The organic layer was separated by centrifugation (2 min, 12000 rpm) and dried over Na<sub>2</sub>SO<sub>4</sub>. Enantiomeric and diastereomeric excess of the corresponding diols were determined by HPLC (see Tables S5).

*2.10. General procedure for the one-pot two-step biosynthesis of chiral 1,2,3-triazole-derived diols **3ab-cf** using GDH/glucose as cofactor regeneration system*

In a 5-mL closed-cap test tube, LKADH (5 U) was added in phosphate buffer (1.2 mL, 50 mM, pH 7.5, 1 mM NADPH) and were mixed with 10 U of GDH and glucose (80 mM) with the corresponding alkynyl derivative **1a-b** and the azido derivative **1c-g** (24



$\mu\text{L}$ , 1 M in DMSO, final concentration: 20 mM of each substrate). Reactions were shaken at 30°C and 250 rpm for 24 h. Then, a magnetic stirrer rolled on Cu wire and  $\text{CuSO}_4$  (25  $\mu\text{L}$  of a solution in water of 100 mM, 0.1 equiv.) were added and stirred at 60-80°C for 24 h. The reaction was stopped by extraction with ethyl acetate (2 x 1 mL). The organic layer was separated by centrifugation (2 min, 13000 rpm) and dried over  $\text{Na}_2\text{SO}_4$ . Enantiomeric and diastereomeric excess of the corresponding diols were determined by HPLC (see Tables S5).

### 2.11. Scale-up of the reactions

In a Falcon tube (50 mL), *E. coli*/ADH-A (200 mg) or LBADH (50 U) was added in phosphate buffer (12 mL, 50 mM, pH 7.5, 1 mM NADH for *E.coli*/ADH-A, or 1 mM NADPH and 1 mM  $\text{MgCl}_2$  for LBADH), mixed with 2-propanol (600  $\mu\text{L}$ , 5% v v<sup>-1</sup>) and the corresponding alkynyl derivative **1a-b** and the azido derivative **1c-g** (240  $\mu\text{L}$ , 1 M in DMSO, final concentration: 20 mM of each substrate). Reactions were shaken at 30°C and 250 rpm for 24 h. Then, a magnetic stirrer rolled on Cu wire and  $\text{CuSO}_4$  (250  $\mu\text{L}$  of a solution in water of 100 mM, 0.1 equiv.) were added and the mixture was shaken at 60-80°C for 24 h. The reaction was centrifuged to remove the pellet and extracted with ethyl acetate (2 x 10 mL). The organic layers were combined and dried over  $\text{Na}_2\text{SO}_4$ . The solvent was concentrated under vacuo and the residue subjected to column chromatography ( $\text{CH}_2\text{Cl}_2$ / MeOH, 9:1) obtaining the final enantioenriched diols, isolated yield: 69-85%.

**(*R*)-2-{4-[(*S*)-1-Hydroxyethyl]-1*H*-1,2,3-triazol-1-yl}-1-phenylethanol [(1*R*,1'')-3ac]**

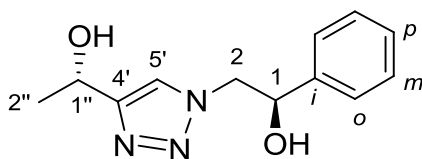

White solid.  $[\alpha]_D -51.3$  ( $c$  1.0, 20°C, MeOH). m.p.: 104-106°C. IR (KBr):  $\nu$  3400, 3140, 2970, 2948, 2913, 1498, 1412, 1303, 1226, 1143, 1085 and 995  $\text{cm}^{-1}$ .  $^1\text{H-NMR}$  (300 MHz,  $\text{CDCl}_3$ )  $\delta$  1.48 (*d*, 3H,  $\text{H}_{2''}$ ,  $^3J_{\text{HH}}$  6.5 Hz), 4.15 (*s*, 1H,  $\text{H}_{\text{OH}}$ ), 4.27 (*dd*, 1H,  $\text{H}_2$ ,  $^2J_{\text{HH}}$  14.0 Hz,  $^3J_{\text{HH}}$  9.4 Hz), 4.58 (*dd*, 1H,  $\text{H}_2$ ,  $^2J_{\text{HH}}$  14.0 Hz,  $^3J_{\text{HH}}$  2.9 Hz), 4.93 (*q*, 1H,  $\text{H}_{1''}$ ,  $^3J_{\text{HH}}$  6.6 Hz), 5.06 (*s*, 1H,  $\text{H}_{\text{OH}}$ ), 5.22 (*ap d*, 1H,  $\text{H}_1$ ,  $^3J_{\text{HH}}$  6.3 Hz), 7.25-7.51 (*m*, 5H,  $\text{H}_{\text{ar}}$ ), 7.56 (*s*, 1H,  $\text{H}_{5'}$ ).  $^{13}\text{C-NMR}$  (75 MHz,  $\text{CDCl}_3$ )  $\delta$  23.0 ( $\text{CH}_3$ ,  $\text{C}_{2''}$ ), 57.8 ( $\text{CH}_2$ ,  $\text{C}_2$ ), 62.7 ( $\text{CH}$ ,  $\text{C}_{1''}$ ), 72.4 ( $\text{CH}$ ,  $\text{C}_1$ ), 122.0 ( $\text{CH}$ ,  $\text{C}_{5'}$ ), 125.8 (2CH,  $\text{C}_o$ ), 128.2 ( $\text{CH}$ ,  $\text{C}_p$ ), 128.7 (2CH,  $\text{C}_m$ ), 140.2 ( $\text{C}$ ,  $\text{C}_i$ ), 162.2 ( $\text{C}$ ,  $\text{C}_{4'}$ ). MS ( $\text{ESI}^+$ ,  $m/z$ ): 256  $[(\text{M}+\text{Na})^+]$ , 100%. HRMS ( $\text{ESI}^+$ ) calcd for  $\text{C}_{12}\text{H}_{15}\text{N}_3\text{O}_2\text{Na}$   $(\text{M}+\text{Na})^+$ : 256.1056; found: 256.1053. 69% yield, >99% *ee*, 96% *de*.

HPLC chromatogram of *rac*-3ac

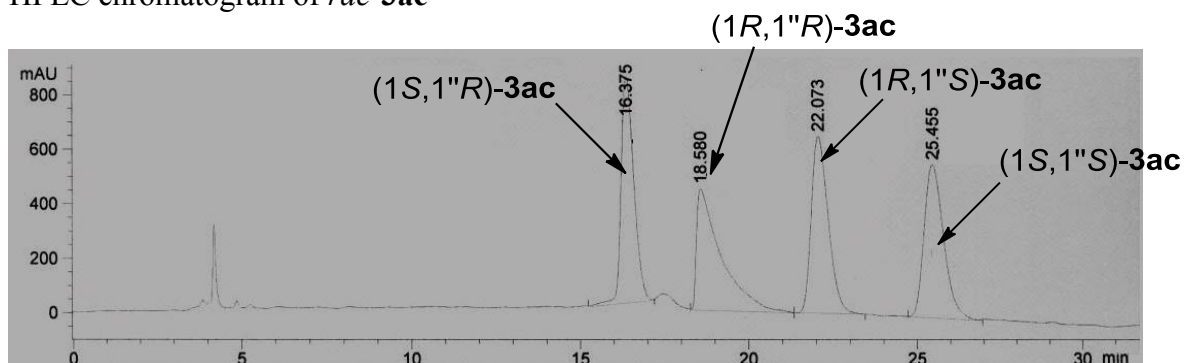

HPLC chromatogram of *anti*-(1*R*,1'')-3ac

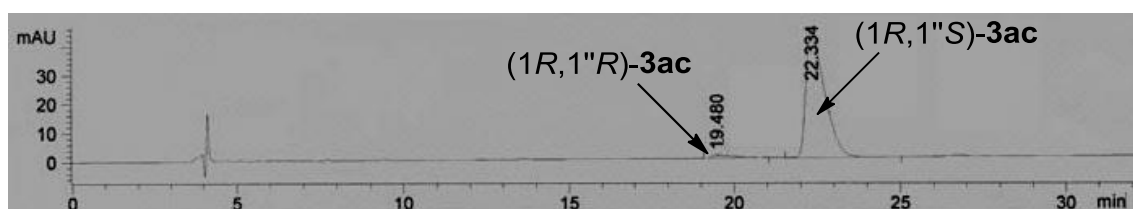

**(*R*)-2-{4-[(*S*)-1-Hydroxyethyl]-1*H*-1,2,3-triazol-1-yl}-1-(naphthalen-2-yl)ethanol**  
**[(1*R*,1''''*S*)-3ad]**

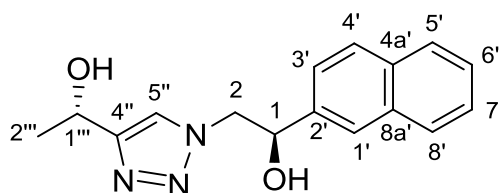

White solid.  $[\alpha]_D -35.9$  ( $c$  1.0, 20°C, MeOH). m.p.: 122-124°C. IR (KBr):  $\nu$  3337, 3149, 2976, 2946, 1603, 1430, 1354, 1297, 1225, 1064, 1003 and 900  $\text{cm}^{-1}$ .  $^1\text{H-NMR}$  (300 MHz,  $\text{CDCl}_3$ )  $\delta$  1.47 (*d*, 3H,  $\text{H}_{2''''}$ ,  $^3J_{\text{HH}}$  6.5 Hz), 4.31 (*dd*, 1H,  $\text{H}_2$ ,  $|^2J_{\text{HH}}|$  13.5 Hz,  $^3J_{\text{HH}}$  9.5 Hz), 4.63 (*dd*, 1H,  $\text{H}_2$ ,  $|^2J_{\text{HH}}|$  13.8 Hz,  $^3J_{\text{HH}}$  2.8 Hz), 4.94 (*q*, 1H,  $\text{H}_{1''''}$ ,  $^3J_{\text{HH}}$  6.5 Hz), 5.34 (*dd*, 1H,  $\text{H}_1$ ,  $^3J_{\text{HH}}$  9.5, 2.5 Hz), 7.45-7.60 (*m*, 3H,  $\text{H}_{\text{Ar}}$ ), 7.60 (*s*, 1H,  $\text{H}_{5''}$ ), 7.73-7.95 (*m*, 4H,  $\text{H}_{\text{Ar}}$ ).  $^{13}\text{C-NMR}$  (75 MHz,  $\text{CDCl}_3$ )  $\delta$  23.0 ( $\text{CH}_3$ ,  $\text{C}_{2''''}$ ), 57.7 ( $\text{CH}_2$ ,  $\text{C}_2$ ), 62.5 ( $\text{CH}$ ,  $\text{C}_{1''''}$ ), 72.4 ( $\text{CH}$ ,  $\text{C}_1$ ), 122.1 ( $\text{CH}$ ,  $\text{C}_{5''}$ ), 123.5 ( $\text{CH}$ ,  $\text{C}_{\text{Ar}}$ ), 124.9 ( $\text{CH}$ ,  $\text{C}_{\text{Ar}}$ ), 126.1 ( $\text{CH}$ ,  $\text{C}_{\text{Ar}}$ ), 126.2 ( $\text{CH}$ ,  $\text{C}_{\text{Ar}}$ ), 127.6 ( $\text{CH}$ ,  $\text{C}_{\text{Ar}}$ ), 127.9 ( $\text{CH}$ ,  $\text{C}_{\text{Ar}}$ ), 128.5 ( $\text{CH}$ ,  $\text{C}_{\text{Ar}}$ ), 133.1 (2C,  $\text{C}_{4\text{a}'}+\text{C}_{8\text{a}'}$ ), 137.5 (C,  $\text{C}_{2'}$ ), 151.8 (C,  $\text{C}_{4''}$ ). MS ( $\text{ESI}^+$ ,  $m/z$ ): 306  $[(\text{M}+\text{Na})^+]$ , 100%. HRMS ( $\text{ESI}^+$ ) calcd for  $\text{C}_{16}\text{H}_{17}\text{N}_3\text{O}_2\text{Na}$   $(\text{M}+\text{Na})^+$ : 306.1213; found: 306.1203. 82% yield, >99% *ee*, 96% *de*.

**HPLC chromatogram of *rac*-3ad**

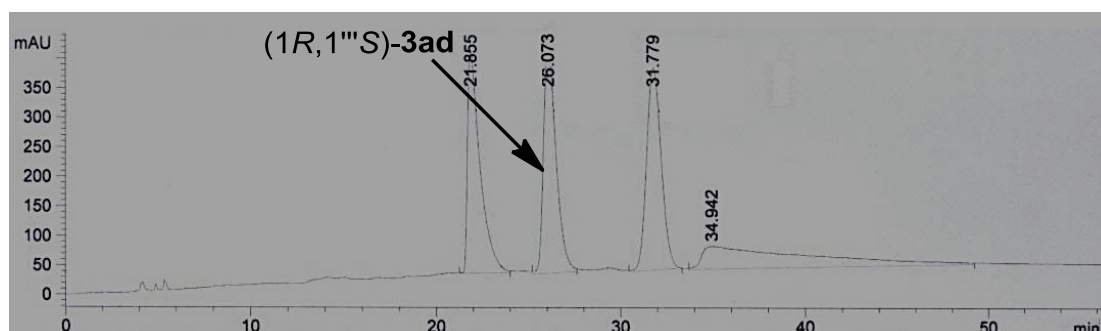

**HPLC chromatogram of *anti*-(1*R*,1''''*S*)-3ad**

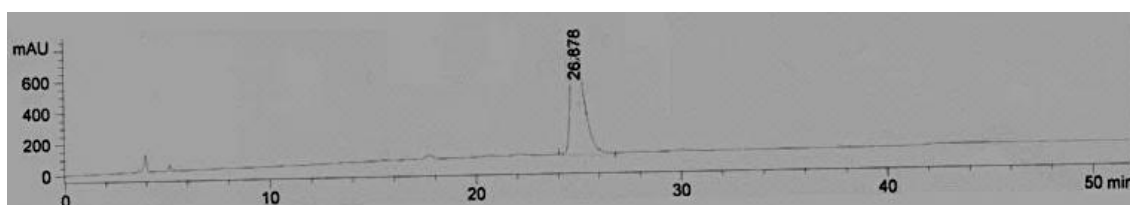

**(*R*)-1-{4-[(*S*)-1-Hydroxyethyl]-1*H*-1,2,3-triazol-1-yl}octan-2-ol [(2*R*,1''*S*)-3ae]**

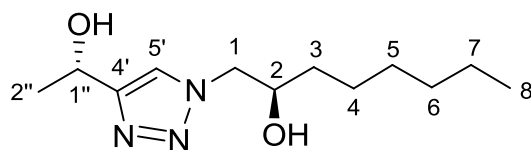

White solid.  $[\alpha]_D -12.7$  ( $c$  1.0, 20°C, MeOH). m.p.: 91-94°C. IR (KBr):  $\nu$  3390, 3148, 2929, 2958, 2856, 1657, 1556, 1525, 1390, 1319, 1130, 1124, 1080 and 928  $\text{cm}^{-1}$ .  $^1\text{H}$ -NMR (300 MHz,  $\text{CDCl}_3$ )  $\delta$  0.88 ( $t$ , 3H,  $\text{H}_8$ ,  $^3J_{\text{HH}}$  6.7 Hz), 1.28-1.31 ( $m$ , 6H,  $\text{H}_5+\text{H}_6+\text{H}_7$ ), 1.48-1.58 ( $m$ , 7H,  $\text{H}_{2''}+\text{H}_3+\text{H}_4$ ), 4.01-4.10 ( $m$ , 2H,  $\text{H}_1+\text{H}_2$ ), 4.41 ( $dd$ , 1H,  $\text{H}_1$ ,  $|^2J_{\text{HH}}|$  11.8 Hz,  $^3J_{\text{HH}}$  6.5 Hz), 4.92 ( $q$ , 1H,  $\text{H}_{1''}$ ,  $^3J_{\text{HH}}$  6.6 Hz), 7.55 ( $s$ , 1H,  $\text{H}_{5'}$ ).  $^{13}\text{C}$ -NMR (75 MHz,  $\text{CDCl}_3$ )  $\delta$  14.0 ( $\text{CH}_3$ ,  $\text{C}_8$ ), 22.5 ( $\text{CH}_2$ ,  $\text{C}_7$ ), 23.0 ( $\text{CH}_3$ ,  $\text{C}_{2''}$ ), 25.4 ( $\text{CH}_2$ ,  $\text{C}_6$ ), 29.1 ( $\text{CH}_2$ ,  $\text{C}_5$ ), 31.7 ( $\text{CH}_2$ ,  $\text{C}_4$ ), 34.4 ( $\text{CH}_2$ ,  $\text{C}_3$ ), 56.5 ( $\text{CH}_2$ ,  $\text{C}_1$ ), 62.6 ( $\text{CH}$ ,  $\text{C}_2$ ), 70.2 ( $\text{CH}$ ,  $\text{C}_{1''}$ ), 122.0 ( $\text{CH}$ ,  $\text{C}_{5'}$ ), 158.6 ( $\text{C}$ ,  $\text{C}_{4'}$ ). MS ( $\text{ESI}^+$ ,  $m/z$ ): 264  $[(\text{M}+\text{Na})^+]$ , 100%. HRMS ( $\text{ESI}^+$ ) calcd for  $\text{C}_{12}\text{H}_{23}\text{N}_3\text{O}_2\text{Na}$   $(\text{M}+\text{Na})^+$ : 264.1682; found: 264.1703. 71% yield, >99% *ee*, 96% *de*.

**HPLC chromatogram of *rac*-3ae**

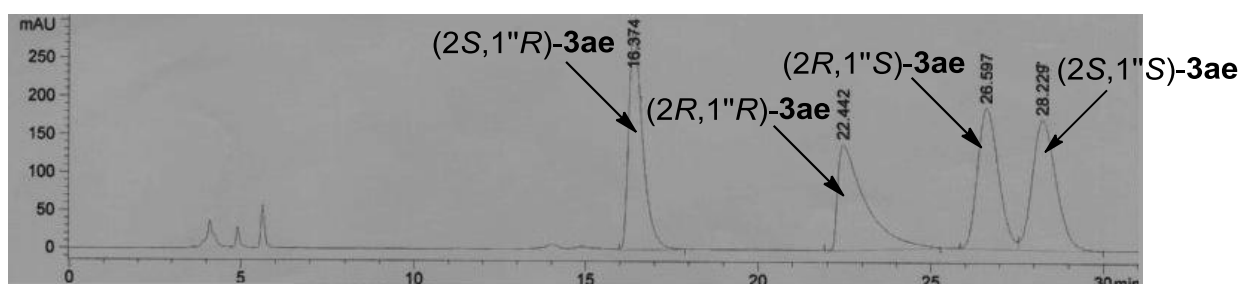

**HPLC chromatogram of *anti*-(2*R*,1''*S*)-3ae**

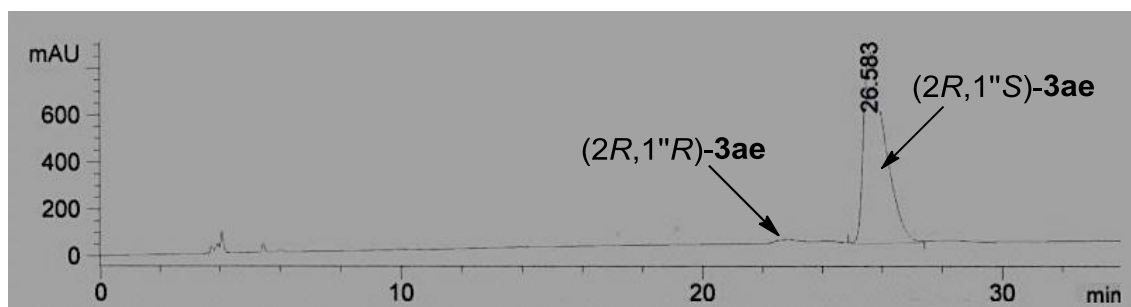

**(*R*)-2-{4-[(*S*)-1-Hydroxyethyl]-1*H*-1,2,3-triazol-1-yl}-1-(4-nitrophenyl)ethanol**  
**[(1*R*,1''*S*)-3af]**

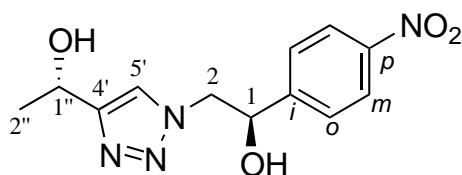

White solid.  $[\alpha]_D -47.8$  ( $c$  1.0, 20°C, MeOH). m.p.: 170-172°C. IR (KBr):  $\nu$  3350, 3294, 2979, 2855, 2450, 1599, 1520, 1461, 1440, 1348, 1312, 1224, 1139, 1107, 1074 and 1003  $\text{cm}^{-1}$ .  $^1\text{H}$ -NMR (300 MHz, MeOH- $d_4$ )  $\delta$  1.54 ( $d$ , 3H,  $\text{H}_{2''}$ ,  $^3J_{\text{HH}}$  6.6 Hz), 4.58 ( $m$ , 2H,  $\text{H}_2$ ), 4.99 ( $q$ , 1H,  $\text{H}_{1''}$ ,  $^3J_{\text{HH}}$  6.6 Hz), 5.26 ( $dd$ , 1H,  $\text{H}_1$ ,  $^3J_{\text{HH}}$  7.3, 4.4 Hz), 7.64 ( $d$ , 2H,  $\text{H}_o$ ,  $^3J_{\text{HH}}$  8.7 Hz), 7.88 ( $s$ , 1H,  $\text{H}_5$ ), 8.24 ( $d$ , 2H,  $\text{H}_m$ ,  $^3J_{\text{HH}}$  8.7 Hz).  $^{13}\text{C}$ -NMR (75 MHz, MeOH- $d_4$ )  $\delta$  22.7 ( $\text{CH}_3$ ,  $\text{C}_{2''}$ ), 56.8 ( $\text{CH}_2$ ,  $\text{C}_2$ ), 62.6 ( $\text{CH}$ ,  $\text{C}_{1''}$ ), 71.6 ( $\text{CH}$ ,  $\text{C}_1$ ), 122.8 ( $\text{CH}$ ,  $\text{C}_{5'}$ ), 123.5 (2CH,  $\text{C}_o$ ), 127.7 (2CH,  $\text{C}_m$ ), 149.9 (C,  $\text{C}_p$ ), 150.2 (C,  $\text{C}_i$ ), 153.3 (C,  $\text{C}_4$ ). MS ( $\text{ESI}^+$ ,  $m/z$ ): 301 [ $(\text{M}+\text{Na})^+$ , 100%]. HRMS ( $\text{ESI}^+$ ) calcd for  $\text{C}_{12}\text{H}_{14}\text{N}_4\text{O}_4\text{Na}$  ( $\text{M}+\text{Na})^+$ : 301.0907; found: 301.0931. 78% yield, 99% *ee*, 96% *de*.

HPLC chromatogram of *rac*-3af

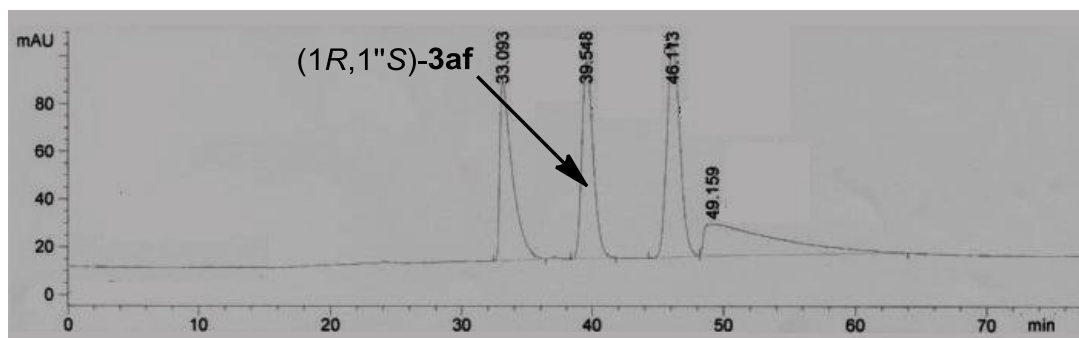

HPLC chromatogram of *anti*-(1*R*,1''*S*)-3af

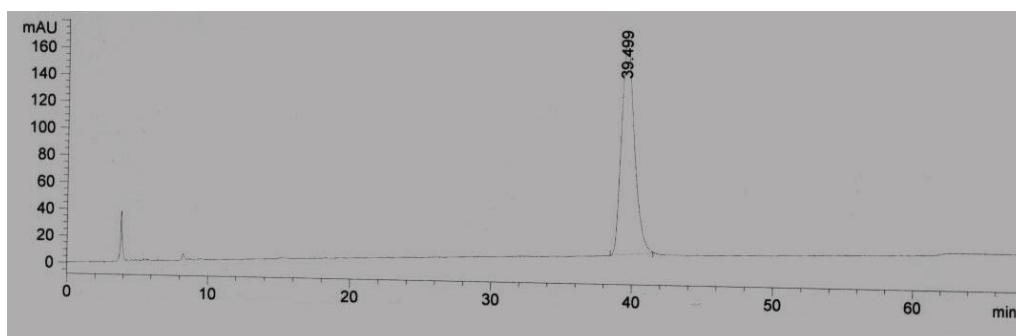

**(*R*)-2-{4-[(*S*)-1-Hydroxyethyl]-1*H*-1,2,3-triazol-1-yl}-1-(4-hydroxyphenyl)ethanol**  
**[(1*R*,1''*S*)-3ag]**

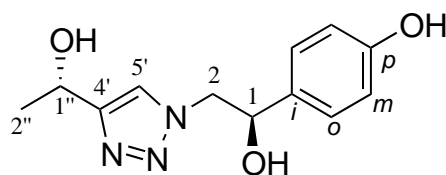

White solid.  $[\alpha]_D -28.2$  ( $c$  1.0, 20°C, MeOH). m.p.: 145-148°C. IR (KBr):  $\nu$  3233, 2983, 2343, 1684, 1617, 1596, 1520, 1455, 1376, 1362, 1304, 1277, 1228, 1164, 1146, 1105, 1074, 1061 and 1004  $\text{cm}^{-1}$ .  $^1\text{H-NMR}$  (300 MHz, MeOH- $d_4$ )  $\delta$  1.51 ( $d$ , 3H,  $\text{H}_{2''}$ ,  $^3J_{\text{HH}}$  6.5 Hz), 4.53 ( $ap\ d$ , 2H,  $\text{H}_2$ ,  $^3J_{\text{HH}}$  6.1 Hz), 4.91 ( $m$ , 2H,  $\text{H}_{1''} + \text{H}_1$ ), 6.77 ( $d$ , 2H,  $\text{H}_m$ ,  $^3J_{\text{HH}}$  8.5 Hz), 7.20 ( $d$ , 2H,  $\text{H}_o$ ,  $^3J_{\text{HH}}$  8.5 Hz), 7.77 ( $s$ , 1H,  $\text{H}_5$ ).  $^{13}\text{C-NMR}$  (75 MHz, MeOH- $d_4$ )  $\delta$  23.7 ( $\text{CH}_3$ ,  $\text{C}_{2''}$ ), 58.3 ( $\text{CH}_2$ ,  $\text{C}_2$ ), 63.7 ( $\text{CH}$ ,  $\text{C}_{1''}$ ), 73.5 ( $\text{CH}$ ,  $\text{C}_1$ ), 116.2 (2CH,  $\text{C}_m$ ), 123.5 ( $\text{CH}$ ,  $\text{C}_{5'}$ ), 128.4 (2CH,  $\text{C}_o$ ), 133.2 ( $\text{CH}$ ,  $\text{C}_i$ ), 153.3 ( $\text{C}$ ,  $\text{C}_p$ ), 158.4 ( $\text{C}$ ,  $\text{C}_{4'}$ ). MS ( $\text{ESI}^+$ ,  $m/z$ ): 272 [ $(\text{M}+\text{Na})^+$ , 100%]. HRMS ( $\text{ESI}^+$ ) calcd for  $\text{C}_{12}\text{H}_{15}\text{N}_3\text{O}_3\text{Na}$  ( $\text{M}+\text{Na})^+$ : 272.1006; found: 272.1007. 70% yield, 99% *ee*, 96% *de*.

HPLC chromatogram of *rac*-3ag

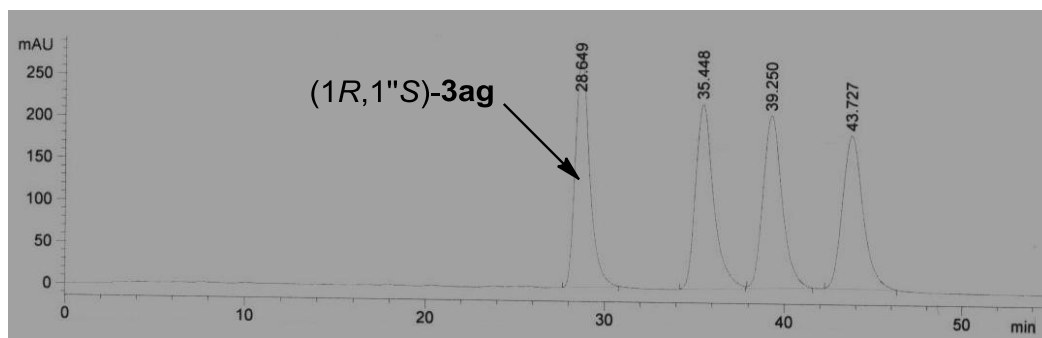

HPLC chromatogram of *anti*-(1*R*,1''*S*)-3ag

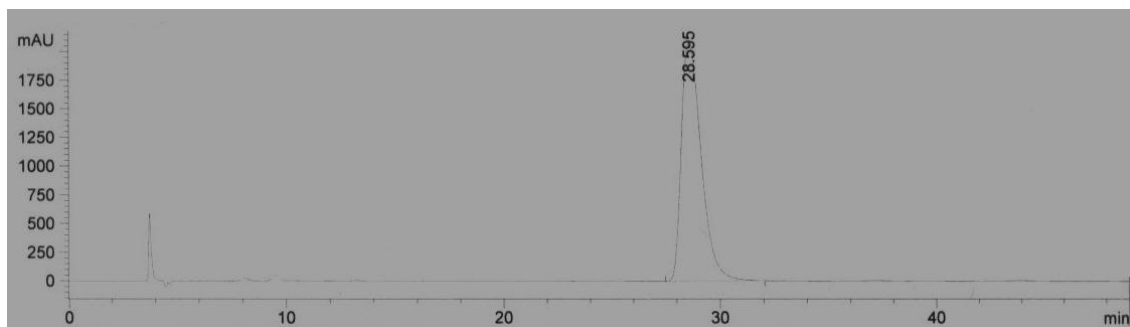

**(*R*)-1-{1-[(*R*)-2-Hydroxy-2-phenylethyl]-1*H*-1,2,3-triazol-4-yl}hexan-1-ol**

**[(1*R*,2''*R*)-3bc]**

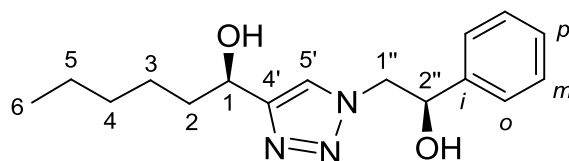

White solid.  $[\alpha]_D -21.3$  ( $c$  1.0, 20°C, MeOH). m.p.: 118-120°C. IR (KBr):  $\nu$  3290, 3148, 2954, 2929, 2848, 1492, 1463, 1428, 1324, 1264, 1216, 1152, 1070, 1033, 980 and 915  $\text{cm}^{-1}$ .  $^1\text{H-NMR}$  (300 MHz,  $\text{CDCl}_3$ )  $\delta$  0.86 (*t*, 3H,  $\text{H}_6$ ,  $^3J_{\text{HH}}$  6.4 Hz), 1.16-1.49 (*m*, 6H,  $\text{H}_3+\text{H}_4+\text{H}_5$ ), 1.79 (*ap q*, 2H,  $\text{H}_2$ ,  $^3J_{\text{HH}}$  6.9 Hz), 4.34 (*dd*, 1H,  $\text{H}_{1''}$ ,  $|^2J_{\text{HH}}|$  14.0 Hz,  $^3J_{\text{HH}}$  9.1 Hz), 4.54 (*dd*, 1H,  $\text{H}_{1''}$ ,  $|^2J_{\text{HH}}|$  14.0 Hz,  $^3J_{\text{HH}}$  3.1 Hz), 4.71 (*t*, 1H,  $\text{H}_1$ ,  $^3J_{\text{HH}}$  6.9 Hz), 5.15 (*dd*, 1H,  $\text{H}_{2''}$ ,  $^3J_{\text{HH}}$  9.2, 3.1 Hz), 7.27-7.46 (*m*, 5H,  $\text{H}_{\text{ar}}$ ), 7.53 (*s*, 1H,  $\text{H}_5$ ).  $^{13}\text{C-NMR}$  (75 MHz,  $\text{CDCl}_3$ )  $\delta$  13.9 ( $\text{CH}_3$ ,  $\text{C}_6$ ), 22.5 ( $\text{CH}_2$ ,  $\text{C}_5$ ), 25.2 ( $\text{CH}_2$ ,  $\text{C}_4$ ), 31.5 ( $\text{CH}_2$ ,  $\text{C}_3$ ), 36.8 ( $\text{CH}_2$ ,  $\text{C}_2$ ), 57.5 ( $\text{CH}_2$ ,  $\text{C}_{1''}$ ), 66.5 ( $\text{CH}$ ,  $\text{C}_1$ ), 72.4 ( $\text{CH}$ ,  $\text{C}_{2''}$ ), 122.4 ( $\text{CH}$ ,  $\text{C}_5$ ), 125.8 (2CH,  $\text{C}_o$ ), 128.2 ( $\text{CH}$ ,  $\text{C}_p$ ), 128.6 (2CH,  $\text{C}_m$ ), 140.2 ( $\text{C}$ ,  $\text{C}_i$ ), 150.7 ( $\text{C}$ ,  $\text{C}_{4'}$ ). MS ( $\text{ESI}^+$ ,  $m/z$ ): 312  $[(\text{M}+\text{Na})^+]$ , 100%. HRMS ( $\text{ESI}^+$ ) calcd for  $\text{C}_{16}\text{H}_{23}\text{N}_3\text{O}_2\text{Na}$  ( $\text{M}+\text{Na})^+$ : 312.1682; found: 312.1666. 78% yield, >99% *ee*, 98% *de*.

HPLC chromatogram of *rac*-3bc

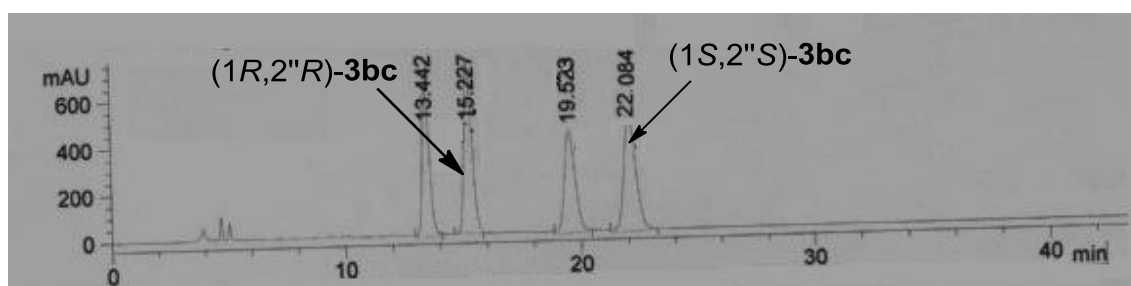

HPLC chromatogram of *syn*-(1*R*,2''*R*)-3bc

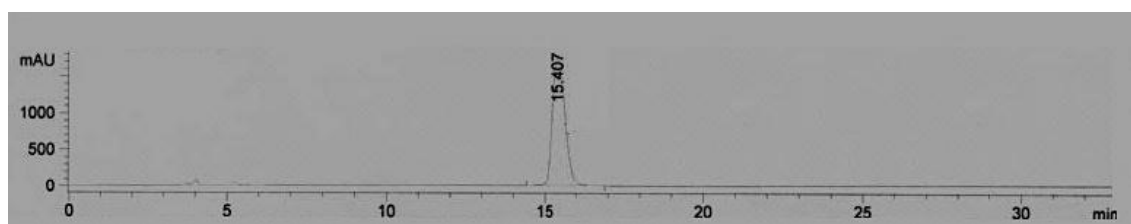

**(R)-1-{1-[(R)-2-Hydroxy-2-(naphthalen-2-yl)ethyl]-1H-1,2,3-triazol-4-yl}hexan-1-ol**  
**[(1R,2''R)-3bd]**

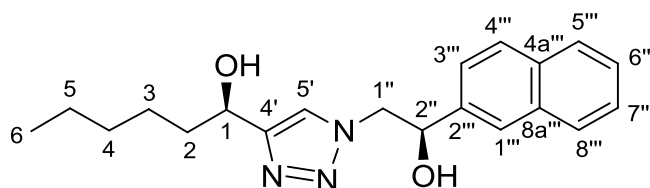

White solid.  $[\alpha]_D -25.8$  ( $c$  1.0, 20°C, MeOH). m.p.: 122-125°C. IR (KBr):  $\nu$  3349, 3139, 2958, 2955, 2858, 1602, 1531, 1467, 1431, 1324, 1216, 1083, 1071, 1040 and 903  $\text{cm}^{-1}$ .  $^1\text{H-NMR}$  (300 MHz,  $\text{CDCl}_3$ )  $\delta$  0.86 ( $t$ , 3H,  $\text{H}_6$ ,  $^3J_{\text{HH}}$  6.4 Hz), 1.23-1.30 ( $m$ , 6H,  $\text{H}_3+\text{H}_4+\text{H}_5$ ), 1.81 ( $m$ , 2H,  $\text{H}_2$ ), 4.46 ( $dd$ , 1H,  $\text{H}_{1''}$ ,  $|^2J_{\text{HH}}|$  14.1 Hz,  $^3J_{\text{HH}}$  8.7 Hz), 4.65 ( $dd$ , 1H,  $\text{H}_{1''}$ ,  $|^2J_{\text{HH}}|$  13.8 Hz,  $^3J_{\text{HH}}$  3.0 Hz), 4.78 ( $ap s$ , 1H,  $\text{H}_1$ ), 5.33 ( $m$ , 1H,  $\text{H}_{2''}$ ), 7.46-7.52 ( $m$ , 3H,  $\text{H}_{\text{ar}}$ ), 7.56 ( $s$ , 1H,  $\text{H}_{5'}$ ), 7.79-7.86 ( $m$ , 4H,  $\text{H}_{\text{ar}}$ ).  $^{13}\text{C-NMR}$  (75 MHz,  $\text{CDCl}_3$ )  $\delta$  14.0 ( $\text{CH}_3$ ,  $\text{C}_6$ ), 22.5 ( $\text{CH}_2$ ,  $\text{C}_5$ ), 25.1 ( $\text{CH}_2$ ,  $\text{C}_4$ ), 31.5 ( $\text{CH}_2$ ,  $\text{C}_3$ ), 36.9 ( $\text{CH}_2$ ,  $\text{C}_2$ ), 50.7 ( $\text{CH}$ ,  $\text{C}_1$ ), 57.4 ( $\text{CH}_2$ ,  $\text{C}_{1''}$ ), 72.7 ( $\text{CH}$ ,  $\text{C}_{2''}$ ), 123.4 ( $\text{CH}$ ,  $\text{C}_{5'}$ ), 125.0 ( $\text{CH}$ ,  $\text{C}_{\text{Ar}}$ ), 126.2 ( $\text{CH}$ ,  $\text{C}_{\text{Ar}}$ ), 126.4 ( $\text{CH}$ ,  $\text{C}_{\text{Ar}}$ ), 127.7 (2CH,  $\text{C}_{\text{Ar}}$ ), 128.0 ( $\text{CH}$ ,  $\text{C}_{\text{Ar}}$ ), 128.5 ( $\text{CH}$ ,  $\text{C}_{\text{Ar}}$ ), 133.1 (2C,  $\text{C}_{4a'''}+\text{C}_{8a'''}$ ), 137.5 (C,  $\text{C}_i$ ), 151.8 (C,  $\text{C}_4$ ). MS ( $\text{ESI}^+$ ,  $m/z$ ): 362  $[(\text{M}+\text{Na})^+]$ , 100%. HRMS ( $\text{ESI}^+$ ) calcd for  $\text{C}_{20}\text{H}_{25}\text{N}_3\text{O}_2\text{Na}$  ( $\text{M}+\text{Na})^+$ : 362.1839; found: 362.1848. 73% yield, >99% *ee*, 98% *de*.

HPLC chromatogram of *rac*-**3bd**

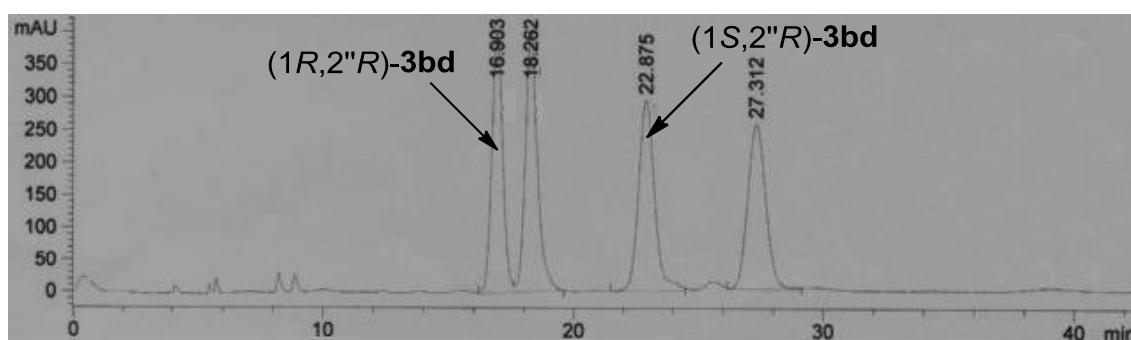

HPLC chromatogram of *syn*-(1R,2''R)-**3bd**

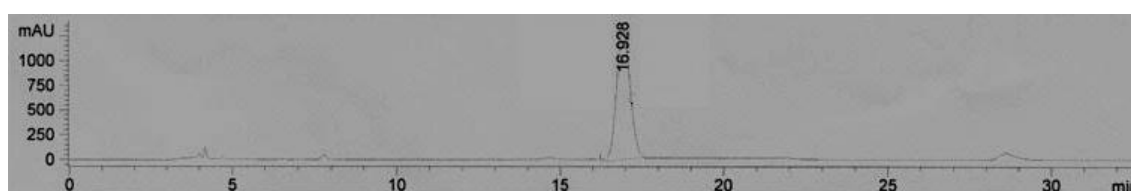



**(*R*)-1-{4-[(*R*)-1-Hydroxyhexyl]-1*H*-1,2,3-triazol-1-yl}octan-2-ol [(2*R*,1''*R*)-3be]**

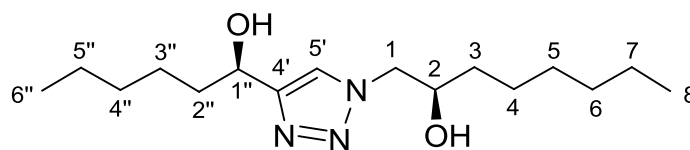

White solid.  $[\alpha]_D -4.8$  ( $c$  1.0, 20°C, MeOH). m.p.: 95-98°C. IR (KBr):  $\nu$  3370, 3150, 2929, 2955, 2856, 1651, 1556, 1567, 1377, 1317, 1217, 1124, 1081 and 927  $\text{cm}^{-1}$ .  $^1\text{H}$ -NMR (300 MHz,  $\text{CDCl}_3$ )  $\delta$  0.86 (*m*, 6H,  $\text{H}_{6''}+\text{H}_8$ ), 1.24-1.59 (*m*, 18H,  $\text{H}_{2''}+\text{H}_3+\text{H}_{3''}+\text{H}_4+\text{H}_{4''}+\text{H}_5+\text{H}_{5''}+\text{H}_6+\text{H}_7$ ), 4.01 (*m*, 1H,  $\text{H}_2$ ), 4.16 (*dd*, 1H,  $\text{H}_1$ ,  $|^2J_{\text{HH}}|$  13.7 Hz,  $^3J_{\text{HH}}$  8.2 Hz), 4.39 (*dd*, 1H,  $\text{H}_1$ ,  $|^2J_{\text{HH}}|$  14.0 Hz,  $^3J_{\text{HH}}$  2.4 Hz), 4.74 (ap *s*, 1H,  $\text{H}_{1''}$ ), 7.56 (*s*, 1H,  $\text{H}_5$ ).  $^{13}\text{C}$ -NMR (75 MHz,  $\text{CDCl}_3$ )  $\delta$  13.9 (2 $\text{CH}_3$ ,  $\text{C}_{6''}+\text{C}_8$ ), 22.5 (2 $\text{CH}_2$ ), 25.2 (2 $\text{CH}_2$ ), 29.1 ( $\text{CH}_2$ ), 31.6 (2 $\text{CH}_2$ ), 34.3 ( $\text{CH}_2$ ), 36.9 ( $\text{CH}_2$ ), 56.2 ( $\text{CH}_2$ ,  $\text{C}_1$ ), 66.5 ( $\text{CH}$ ,  $\text{C}_2$ ), 70.2 ( $\text{CH}$ ,  $\text{C}_{1''}$ ), 122.3 ( $\text{CH}$ ,  $\text{C}_5$ ), 158.9 ( $\text{C}$ ,  $\text{C}_4$ ). MS ( $\text{ESI}^+$ ,  $m/z$ ): 320 [( $\text{M}+\text{Na}$ ) $^+$ , 100%]. HRMS ( $\text{ESI}^+$ ) calcd for  $\text{C}_{16}\text{H}_{31}\text{N}_3\text{O}_2\text{Na}$  ( $\text{M}+\text{Na}$ ) $^+$ : 320.2308; found: 320.2316. 85% yield, 99% *ee*, 98% *de*.

**HPLC chromatogram of *rac*-3be**

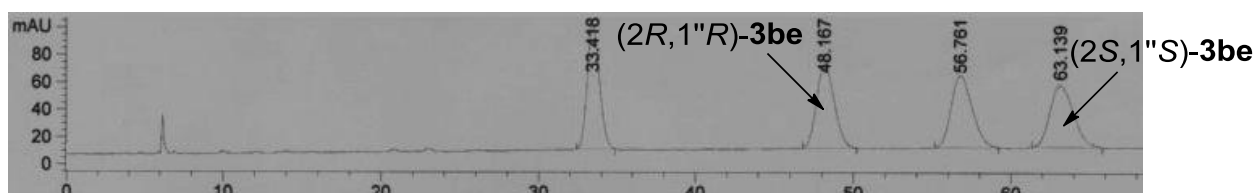

**HPLC chromatogram of *syn*-(2*R*,1''*R*)-3be**

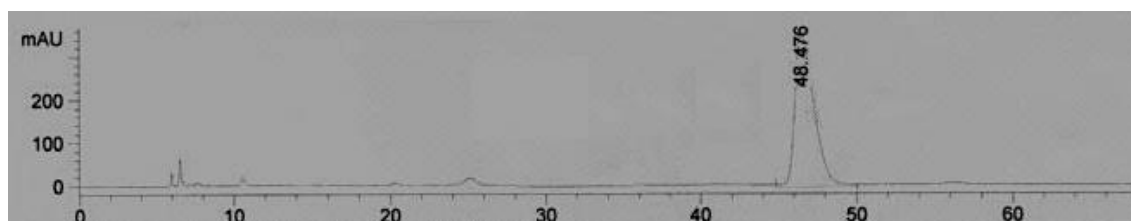

**(S)-1-{1-[(S)-2-Hydroxy-2-(4-nitrophenyl)ethyl]-1H-1,2,3-triazol-4-yl}hexan-1-ol**  
**[(1S,2''S)-3bf]**

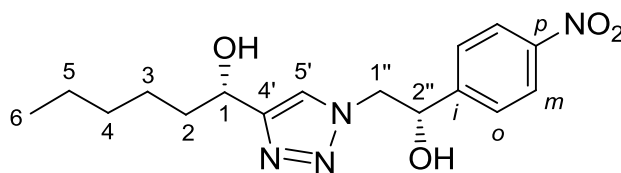

White solid.  $[\alpha]_D^{20} +27.4$  ( $c$  1.0, 20°C, MeOH). m.p.: 135-138°C. IR (KBr):  $\nu$  3294, 3146, 2979, 2855, 1599, 1519, 1461, 1440, 1348, 1312, 1254, 1205, 1139, 1106, 1074, 1013, 880 and 856  $\text{cm}^{-1}$ .  $^1\text{H-NMR}$  (300 MHz, MeOH- $d_4$ )  $\delta$  0.89 ( $t$ , 3H,  $\text{H}_6$ ,  $^3J_{\text{HH}}$  6 Hz), 1.30-1.33 ( $m$ , 6H,  $\text{H}_3+\text{H}_4+\text{H}_5$ ), 1.77-1.80 ( $m$ , 2H), 4.61-4.65 ( $m$ , 2H,  $\text{H}_{1''}$ ), 4.75 ( $t$ , 1H,  $\text{H}_1$ ,  $^3J_{\text{HH}}$  6.6 Hz), 5.24 ( $dd$ , 1H,  $\text{H}_{2''}$ ,  $^2J_{\text{HH}}$  6.9 Hz,  $^3J_{\text{HH}}$  4.5 Hz), 7.58 ( $dd$ , 2H,  $\text{H}_o$ ,  $^3J_{\text{HH}}$  8.7 Hz,  $^4J_{\text{HH}}$  3.4 Hz), 7.82 ( $s$ , 1H,  $\text{H}_{5'}$ ), 8.18 ( $dd$ , 2H,  $\text{H}_m$ ,  $^3J_{\text{HH}}$  8.7 Hz,  $^4J_{\text{HH}}$  2.2 Hz).  $^{13}\text{C-NMR}$  (75 MHz, MeOH- $d_4$ )  $\delta$  14.3 ( $\text{CH}_3$ ,  $\text{C}_6$ ), 23.5 ( $\text{CH}_2$ ,  $\text{C}_5$ ), 26.0 ( $\text{CH}_2$ ,  $\text{C}_4$ ), 32.6 ( $\text{CH}_2$ ,  $\text{C}_3$ ), 38.2 ( $\text{CH}_2$ ,  $\text{C}_2$ ), 57.5 ( $\text{CH}_2$ ,  $\text{C}_{1''}$ ), 67.5 ( $\text{CH}$ ,  $\text{C}_1$ ), 72.5 ( $\text{CH}$ ,  $\text{C}_{2''}$ ), 124.2 ( $\text{CH}$ ,  $\text{C}_{5'}$ ), 124.5 (2CH,  $\text{C}_o$ ), 128.3 (2CH,  $\text{C}_m$ ), 148.9 (C,  $\text{C}_p$ ), 149.7 (C,  $\text{C}_i$ ), 152.4 (C,  $\text{C}_{5'}$ ). MS ( $\text{ESI}^+$ ,  $m/z$ ): 335  $[(\text{M}+\text{H})^+]$ , 100%. HRMS ( $\text{ESI}^+$ ) calcd for  $\text{C}_{16}\text{H}_{22}\text{N}_4\text{O}_4\text{Na}$  ( $\text{M}+\text{Na}$ ) $^+$ : 357.1533; found: 357.1533. 71% yield, 99% *ee*, 99% *de*.

HPLC chromatogram of *rac*-**3bf**

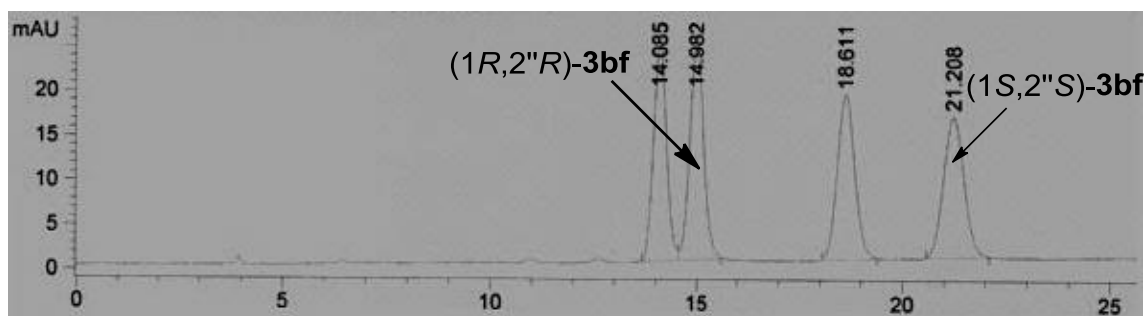

HPLC chromatogram of *syn*-(1S,2''S)-**3bf**

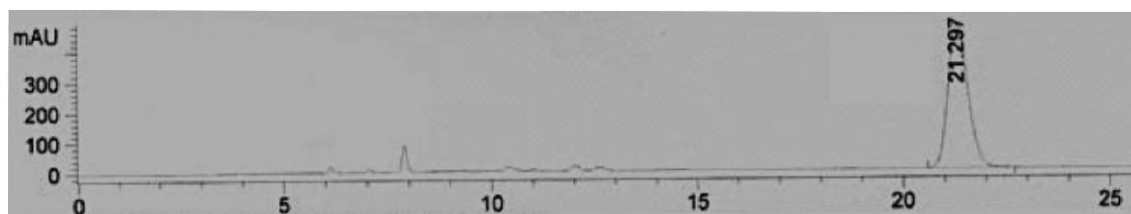

### 3. Analytics

#### 3.1. GC Analyses for determination of conversions and enantiomeric excess of alcohols

2

The following columns were used: **A**: Varian Chirasil Dex CB (25 m x 0.25 mm x 0.25  $\mu$ m, 12.2 psi N<sub>2</sub>); and **B**: Restek RT-BetaDEXse (30 m x 0.25 mm x 0.25  $\mu$ m, 12.2 psi N<sub>2</sub>).

**Table S3** Retention times for determination of enzymatic conversions and *ee* by GC

| compound             | column | program <sup>a</sup>                      | retention time (min) |                  |              |
|----------------------|--------|-------------------------------------------|----------------------|------------------|--------------|
|                      |        |                                           | ketone               | alcohol <b>2</b> |              |
|                      |        |                                           | <b>1</b>             | ( <i>R</i> )     | ( <i>S</i> ) |
| <b>a</b>             | B      | 35/10/8/90/0/20/180/2                     | 5.6                  | 13.8             | 14.5         |
| <b>b</b>             | B      | 70/5/1/95/0/20/180/5                      | 25.3                 | 31.9             | 32.7         |
| <b>c</b>             | B      | 90/4/5/180/5                              | 22.4                 | 23.6             |              |
| <b>c<sup>b</sup></b> | B      | 90/5/2.5/105/0/5/135/0/2.5/145/0/20/180/2 | -                    | 40.7             | 39.6         |
| <b>e</b>             | B      | 70/5/1/95/0/20/180/5                      | 37.4                 | 38.8             | 38.2         |

<sup>a</sup> Program: initial temp. (°C)/ time (min)/ slope (°C/min)/ temp. (°C)/ time (min)/ slope (°C/min)/ final temp. (°C)/ time (min). <sup>b</sup> Determined as the corresponding *O*-acetyl derivative.

### 3.2. HPLC analyses for determination of conversions and enantiomeric excess of alcohol **2d**, **2f** and **2g**

The following HPLC conditions were used: **A**: column Chiralpak OD-H (0.46 cm x 25 cm, Daicel Chemical Ind. Ltd.); isocratic eluent: *n*-hexane / *i*-propanol (80:20), 30°C, flow 0.8 mL min<sup>-1</sup>. **B**: column Chiralpak IC (4.0 mm x 10 mm, Daicel Chemical Ind. Ltd.); isocratic eluent: *n*-hexane / *i*-propanol (92:8), 40°C, flow 0.8 mL min<sup>-1</sup>; **C**: column Chiralpak IC (4.0 mm x 10 mm, Daicel Chemical Ind. Ltd.); isocratic eluent: *n*-hexane / *i*-propanol (95:5), 40°C, flow 0.8 mL min<sup>-1</sup>

**Table S4** Retention times for determination of alcohol *ee* values by HPLC

| compound | conditions | retention time (min) |                  |              |
|----------|------------|----------------------|------------------|--------------|
|          |            | ketone               | alcohol <b>2</b> |              |
|          |            | <b>1</b>             | ( <i>R</i> )     | ( <i>S</i> ) |
| <b>d</b> | A          | 11.4                 | 10.4             | 8.9          |
| <b>f</b> | B          | 47.0                 | 37.1             | 28.8         |
| <b>g</b> | C          | 19.3                 | 27.4             | 28.7         |

### 3.3. HPLC analyses for determination of *ee* and *de* of diols *syn*- and *anti*-**3**

The following HPLC conditions were used: **A**: column Chiralpak IC (4.0 mm x 10 mm, Daicel Chemical Ind. Ltd.); isocratic eluent: *n*-hexane / *i*-propanol (80:20), 40°C, flow 0.8 mL min<sup>-1</sup>; **B**: column Chiralpak IC (4.0 mm x 10 mm, Daicel Chemical Ind. Ltd.); isocratic eluent: *n*-hexane / *i*-propanol (85:15), 40°C, flow 0.8 mL min<sup>-1</sup>; **C**: column Chiralpak IC (4.0 mm x 10 mm, Daicel Chemical Ind. Ltd.); isocratic eluent: *n*-hexane / *i*-propanol (90:10), 40°C, flow 0.8 mL min<sup>-1</sup>. **D**: column Chiralpak IC (4.0 mm x 10 mm, Daicel Chemical Ind. Ltd.); isocratic eluent: *n*-hexane / *i*-propanol (84:16), 40°C, flow 0.8 mL min<sup>-1</sup>. **E**: column Chiralpak OJ-H (4.0 mm x 10 mm, Daicel Chemical Ind. Ltd.); isocratic eluent: *n*-hexane / *i*-propanol (85:15), 40°C, flow 0.8 mL min<sup>-1</sup>.

**Table S5** Retention times for determination of *ee* and *de* values of *syn*- and *anti*-**3** by HPLC

| compound  | conditions | retention time (min)          |                 |                         |                 |
|-----------|------------|-------------------------------|-----------------|-------------------------|-----------------|
|           |            | <i>syn</i> - <b>3</b>         |                 | <i>anti</i> - <b>3</b>  |                 |
|           |            | ( <i>R,R</i> )                | ( <i>S,S</i> )  | ( <i>S,R</i> )          | ( <i>R,S</i> )  |
| <b>ac</b> | A          | 18.5                          | 25.4            | 16.3                    | 22.1            |
| <b>ad</b> | A          | 21.8, 31.7, 34.4 <sup>a</sup> |                 |                         | 26.6            |
| <b>ae</b> | B          | 22.4                          | 28.2            | 16.3                    | 26.5            |
| <b>af</b> | D          | 33.0, 46.1, 49.2 <sup>a</sup> |                 |                         | 39.5            |
| <b>ag</b> | E          | 35.4, 39.2, 43.7 <sup>a</sup> |                 |                         | 28.6            |
| <b>bc</b> | A          | 15.2                          | 22.0            | 13.4, 19.5 <sup>a</sup> |                 |
| <b>bd</b> | A          | 16.9                          | -- <sup>b</sup> | 22.9                    | -- <sup>b</sup> |
| <b>be</b> | C          | 48.1                          | 63.1            | 33.4, 56.7 <sup>a</sup> |                 |
| <b>bf</b> | A          | 15.0                          | 21.2            | 14.0, 18.6 <sup>a</sup> |                 |

<sup>a</sup> At this stage is not possible to assign these retention times to any diastereoisomer.

<sup>b</sup> The other two isomers (*S,S*) and (*R,S*) showed retention times of 18.3 and 27.3 min.

#### 4. Supporting references.

1. K. Edegger, C. C. Gruber, T. M. Poessl, S. R. Wallner, I. Lavandera, K. Faber, F. Niehaus, J. Eck, R. Oehrlein, A. Hafner and W. Kroutil, *Chem. Commun.*, 2006, 2402.
2. S. Eagon, N. Ball-Jones, D. Haddenham, J. Saavedra, C. Delieto, M. Buckman and B. Singarm, *Tetrahedron Lett.*, 2010, **51**, 6418.
3. R. Moumne, V. Larue, B. Seijo, T. Lecourt, L. Micouin and C. Tisne, *Org. Biomol. Chem.*, 2010, **8**, 1154.
4. E. C. S. Brenelli, J. A. Brenelli and R. C. L. Pinto, *Tetrahedron Lett.*, 2005, **46**, 4531.
5. B. T. Cho, S. K. Kang and S. H. Shin, *Tetrahedron Lett.*, 2002, **43**, 1209.
6. C. E. Katz, T. Ribelin, D. Withrow, Y. Basseri, A. K. Manukyan, A. Bermudez, C. G. Nuera, V. W. Day, D. R. Powell, J. L. Poutsma and J. Aubé, *J. Org. Chem.*, 2008, **73**, 3318.
7. F. R. Bisogno, A. Cuertos, A. A. Orden, M. Kurina-Sanz, I. Lavandera and V. Gotor, *Adv. Synth. Catal.*, 2010, **352**, 1657.
8. J. H. Schrittwieser, I. Lavandera, B. Seisser, B. Mautner and W. Kroutil, *Eur. J. Org. Chem.*, 2009, 2293.

5. Compound NMR spectra

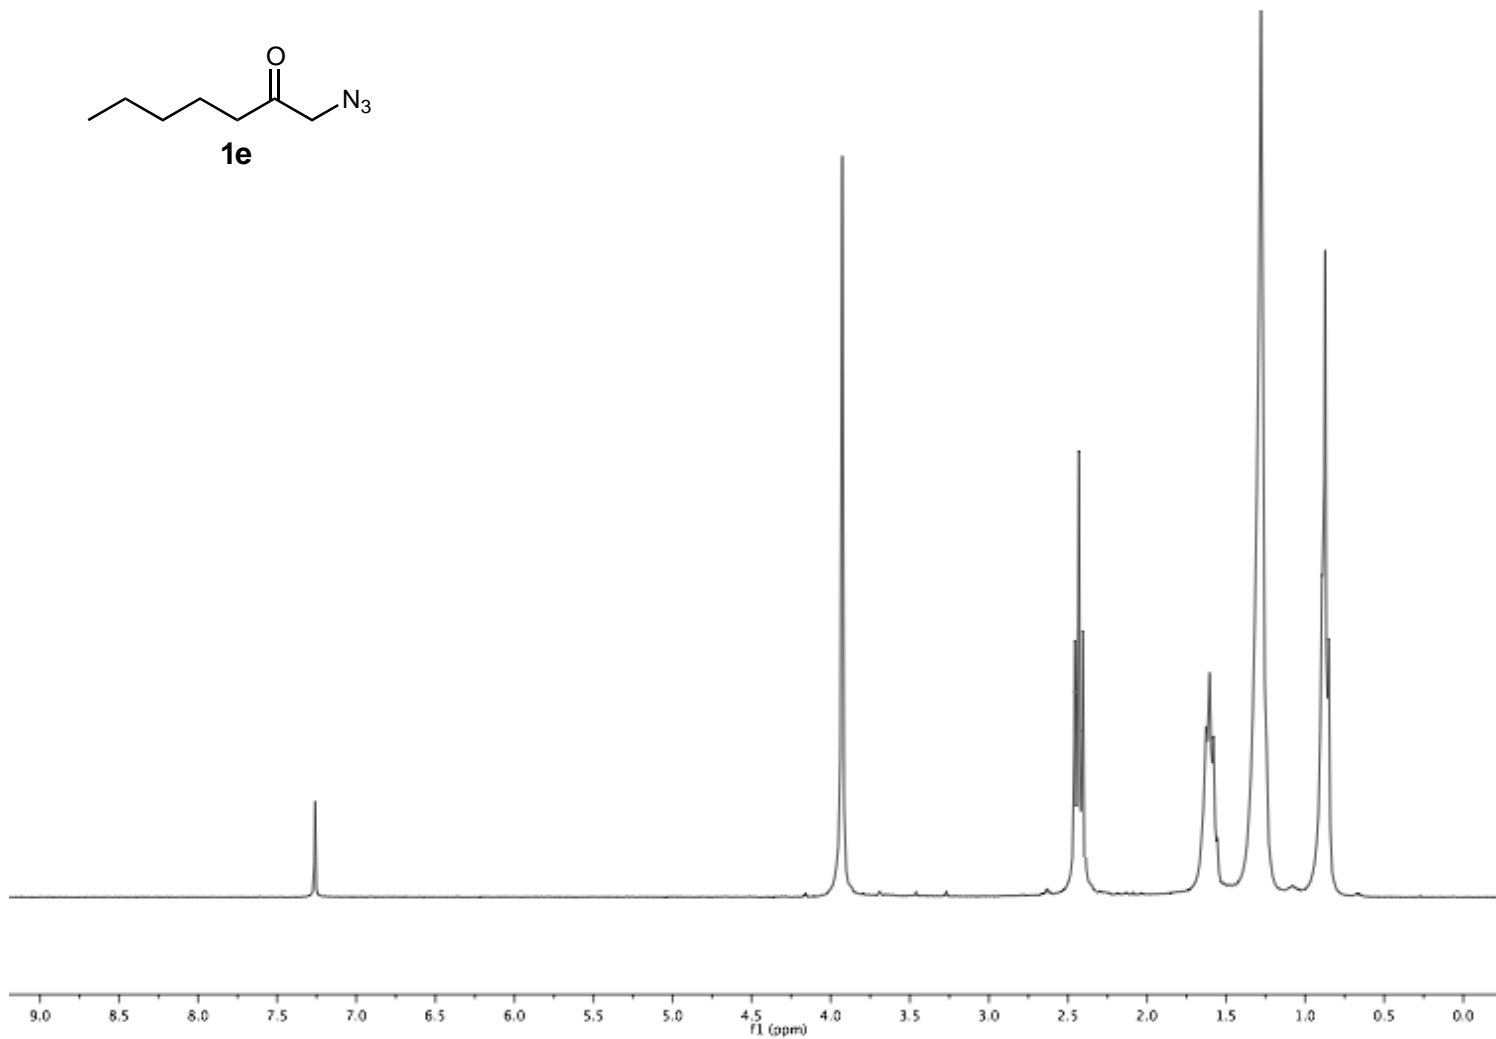

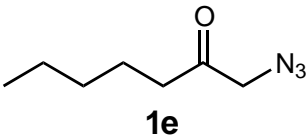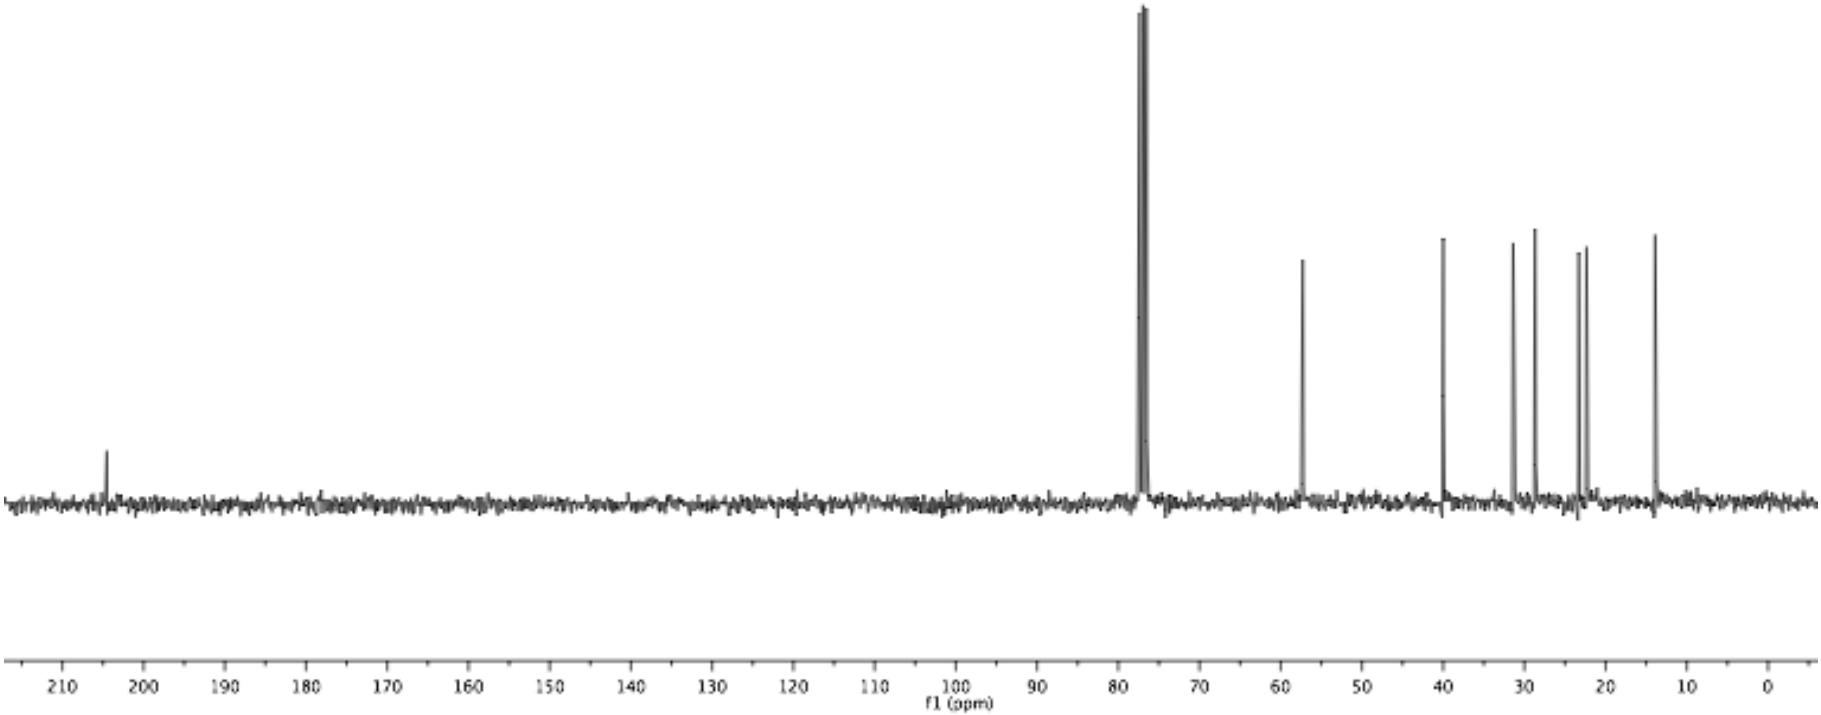



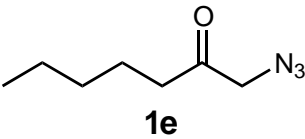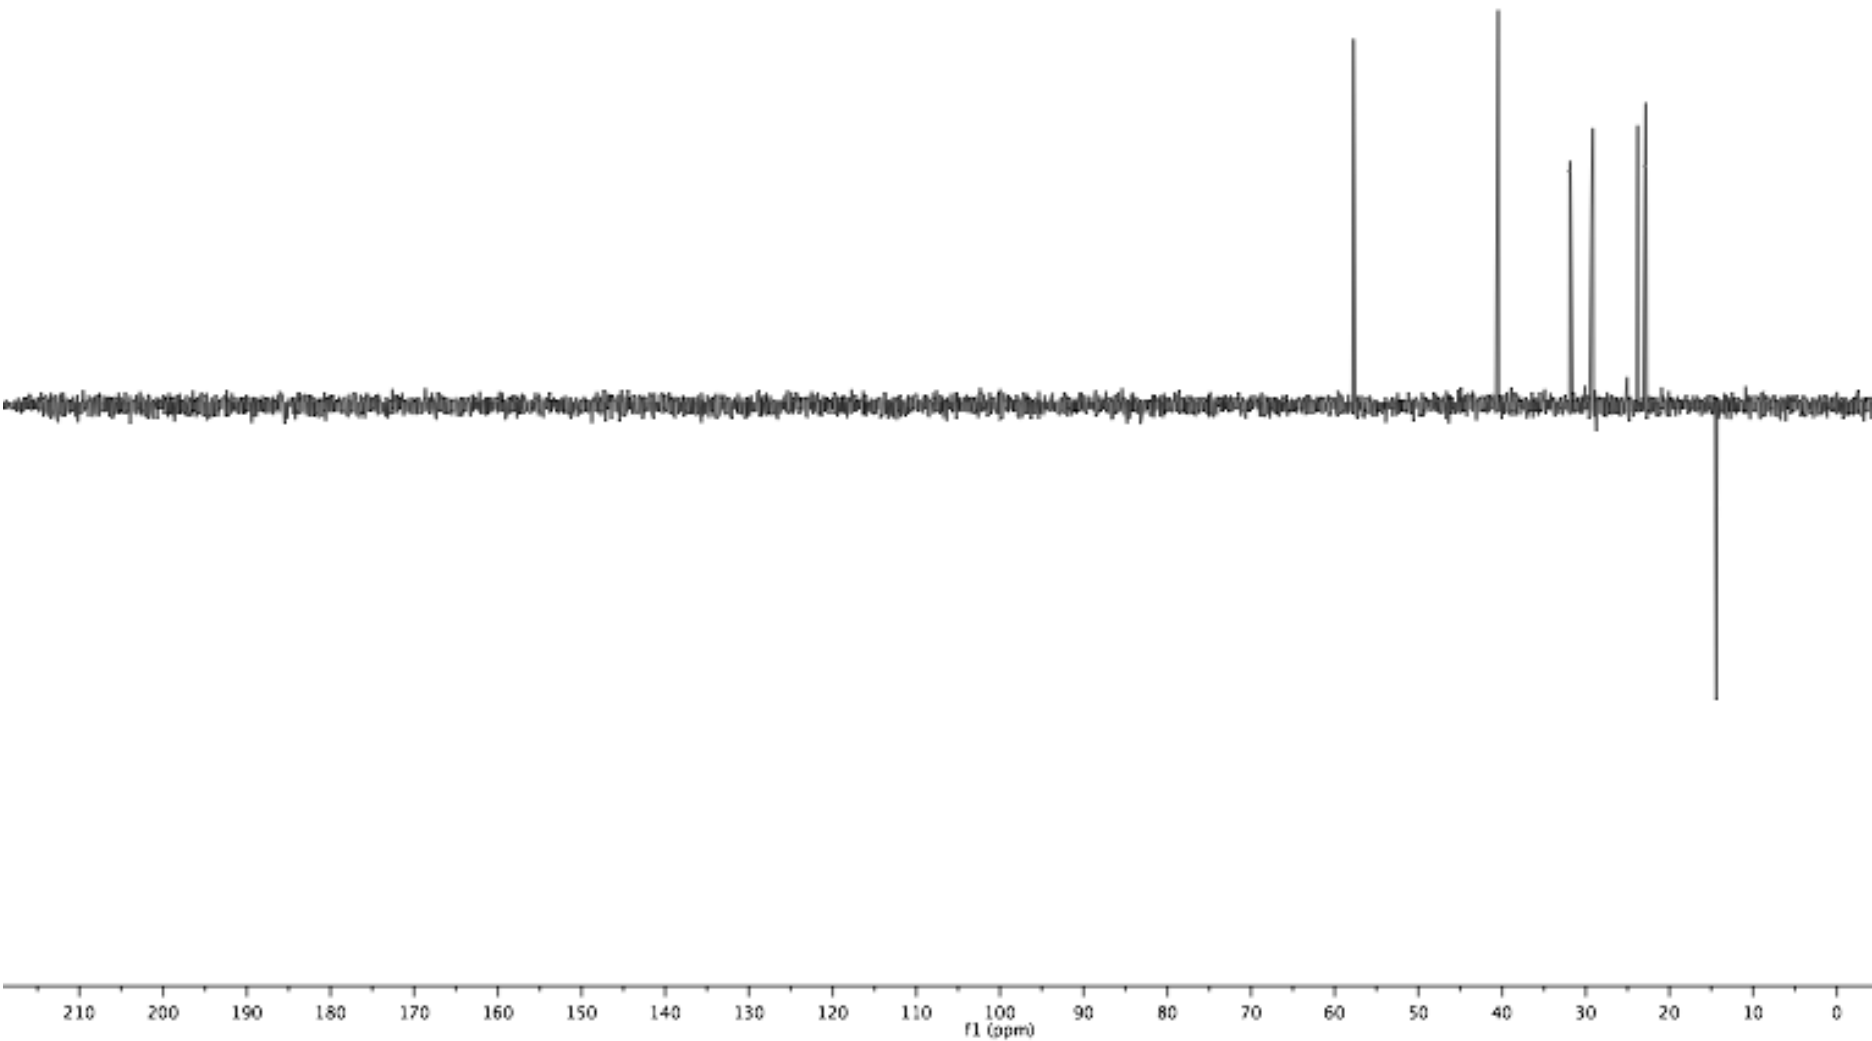

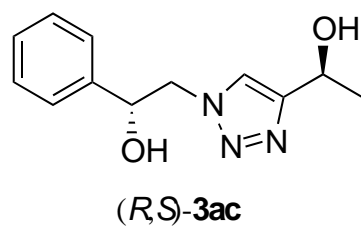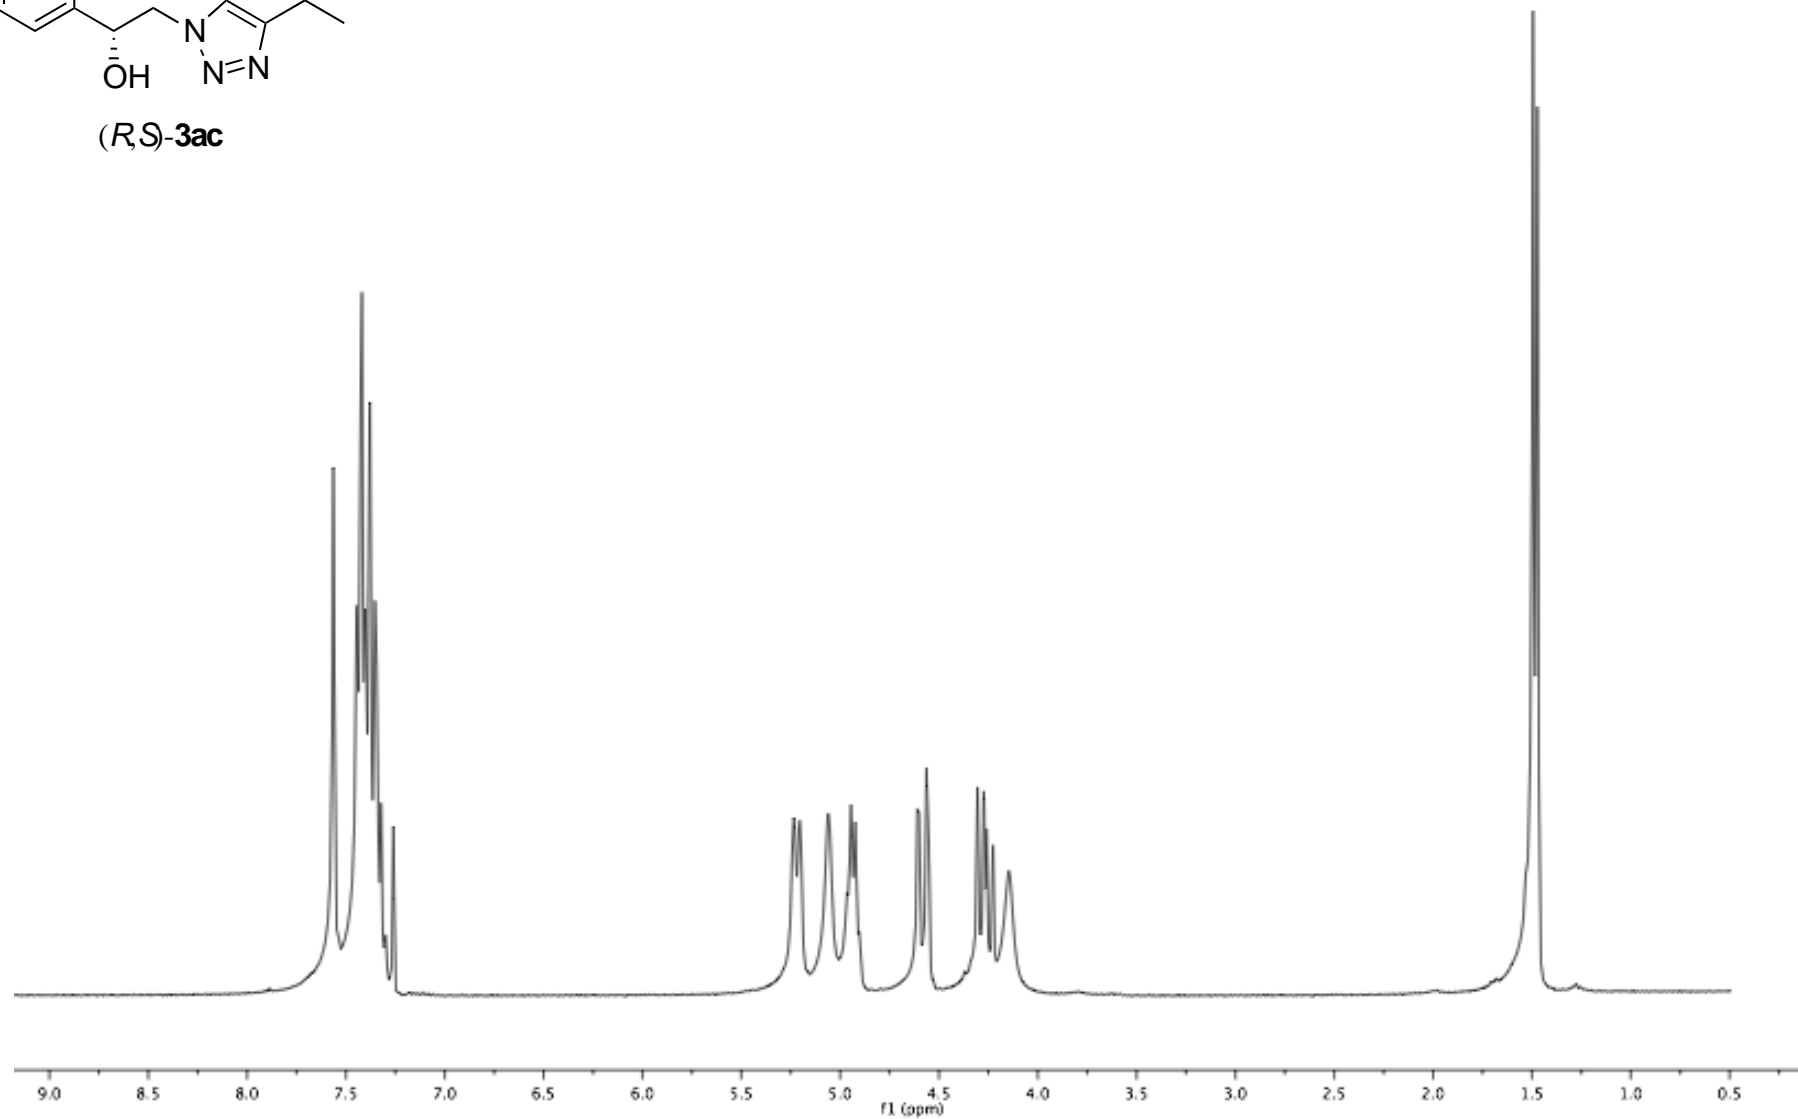

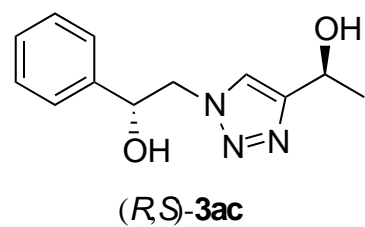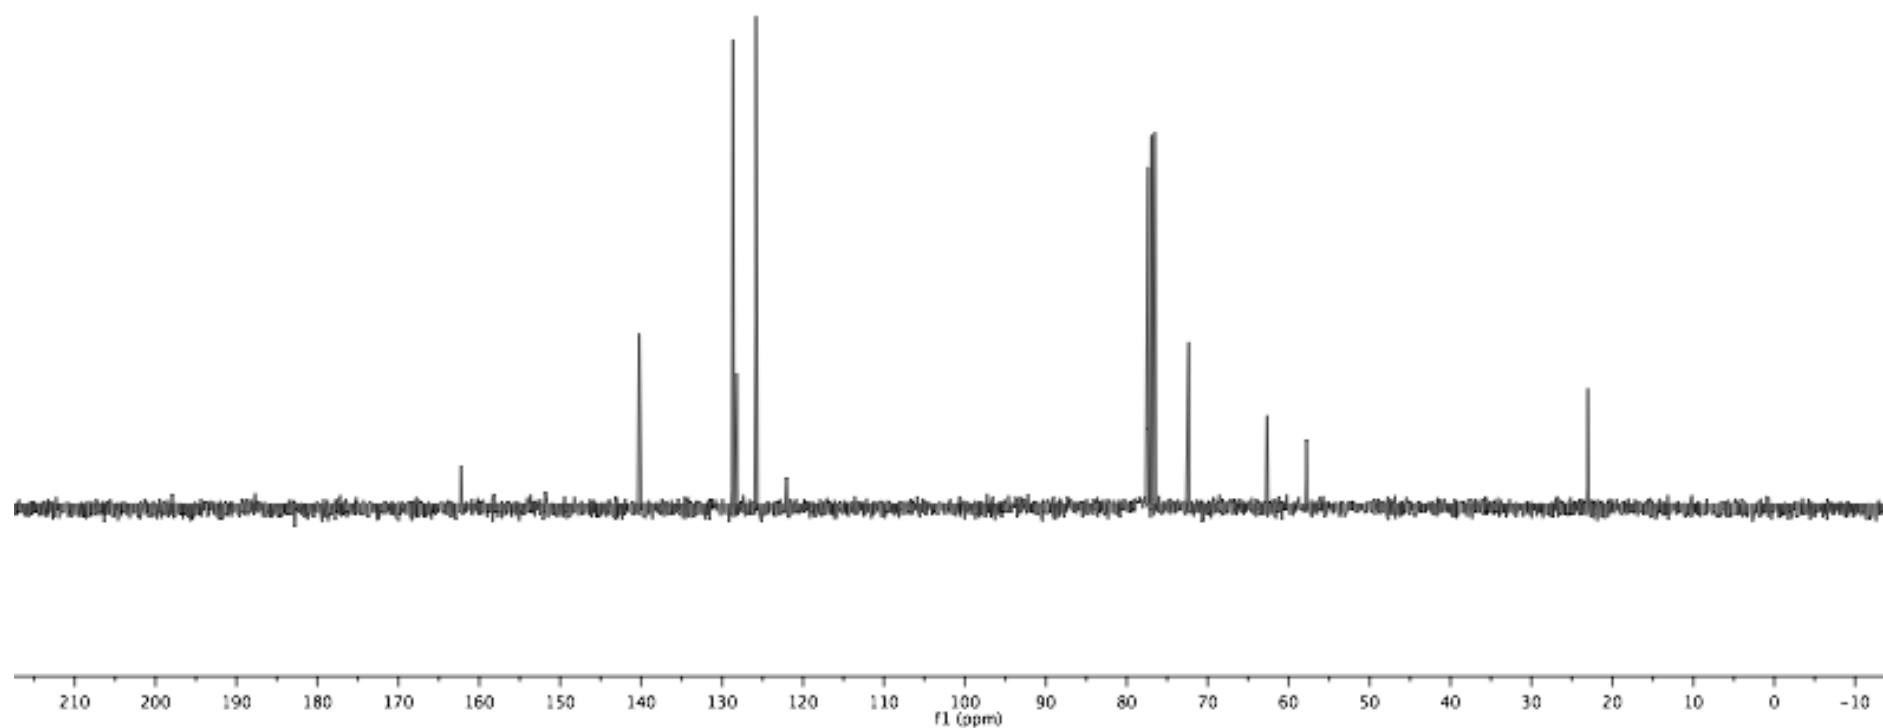

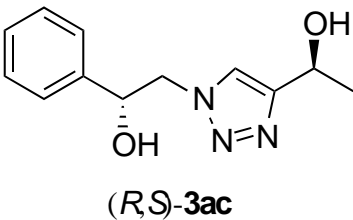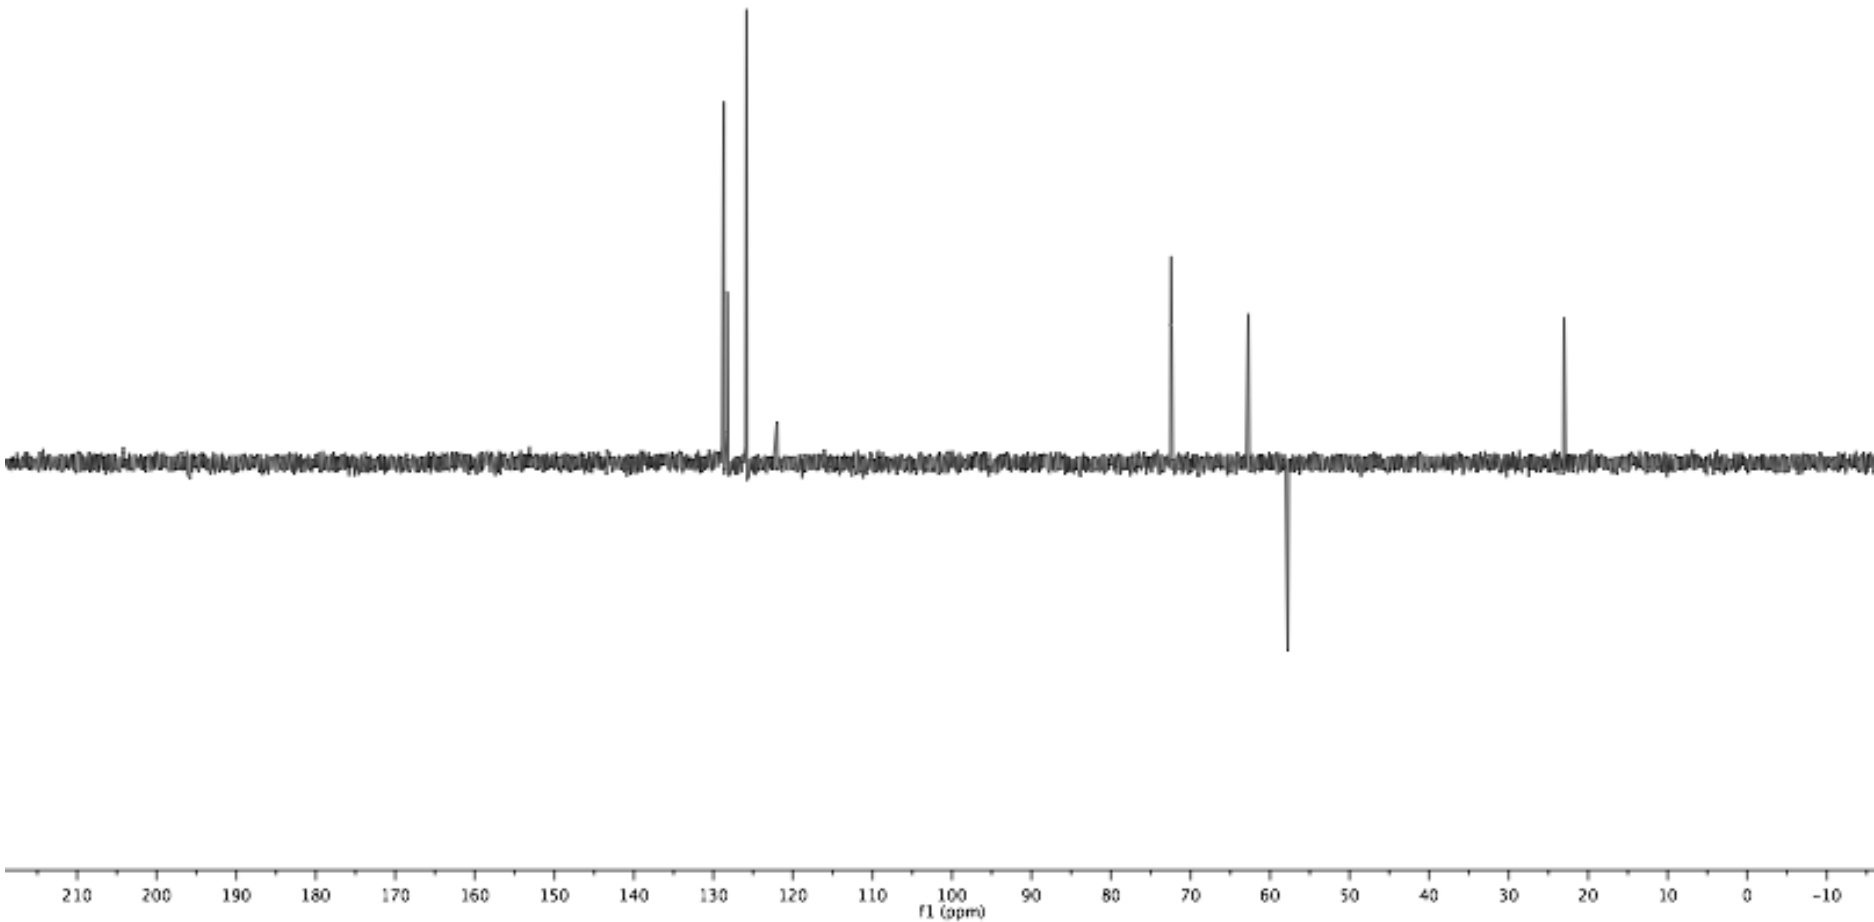

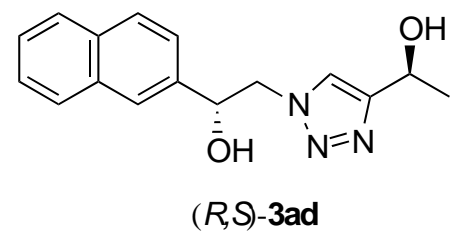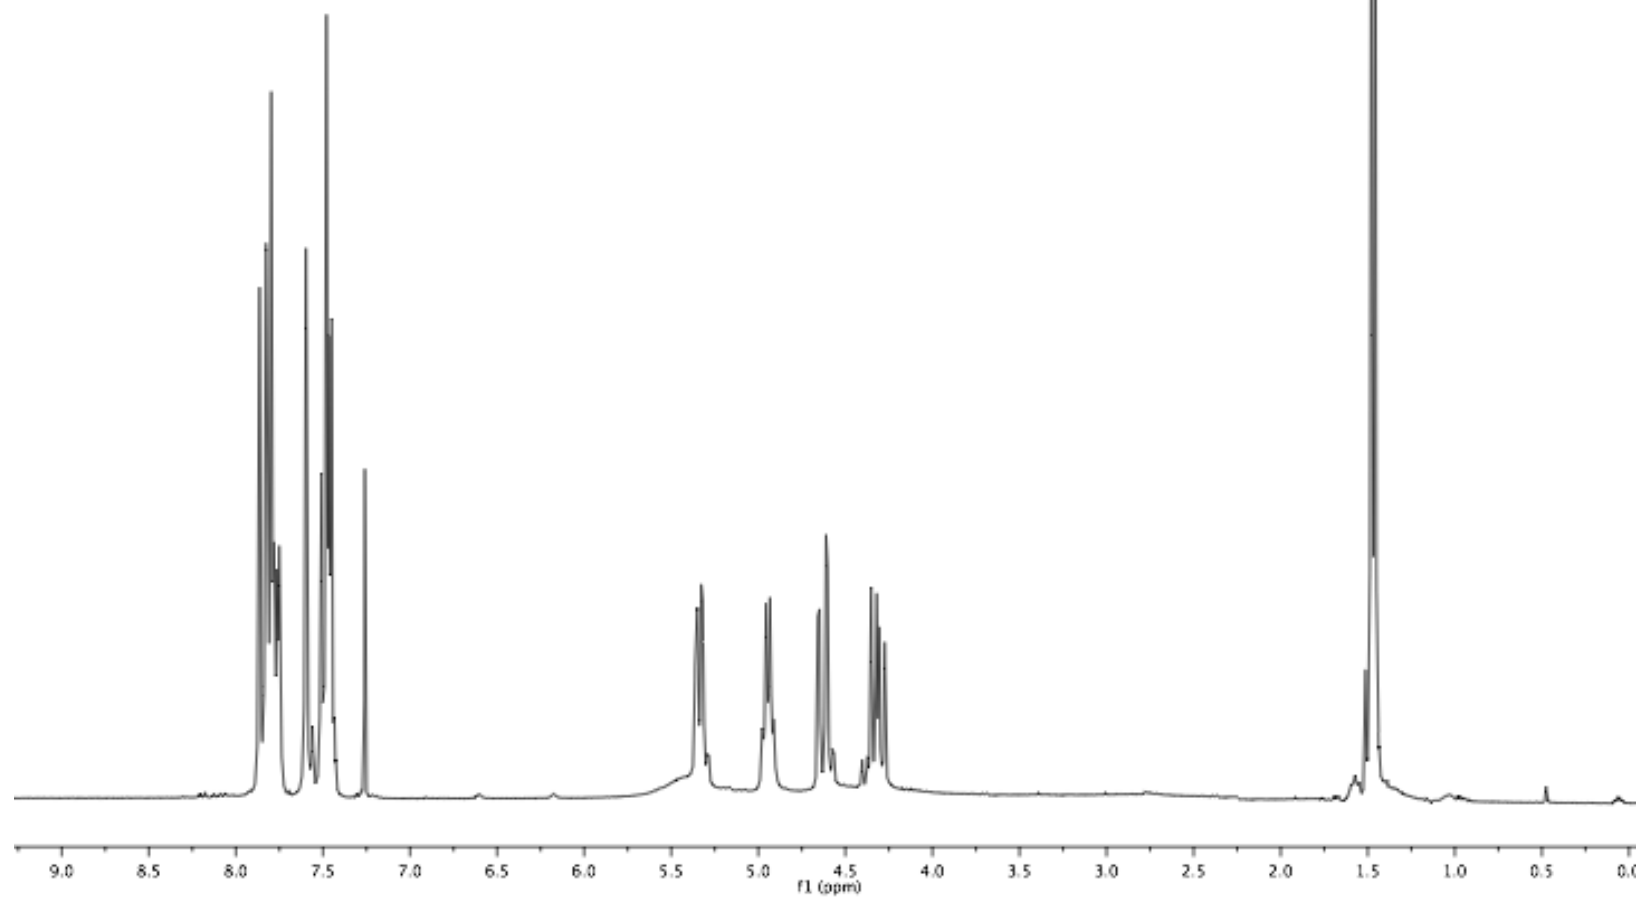

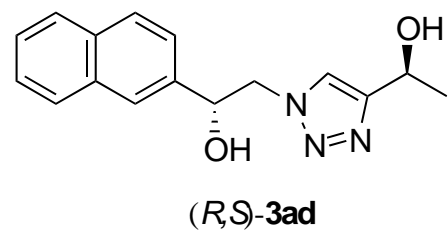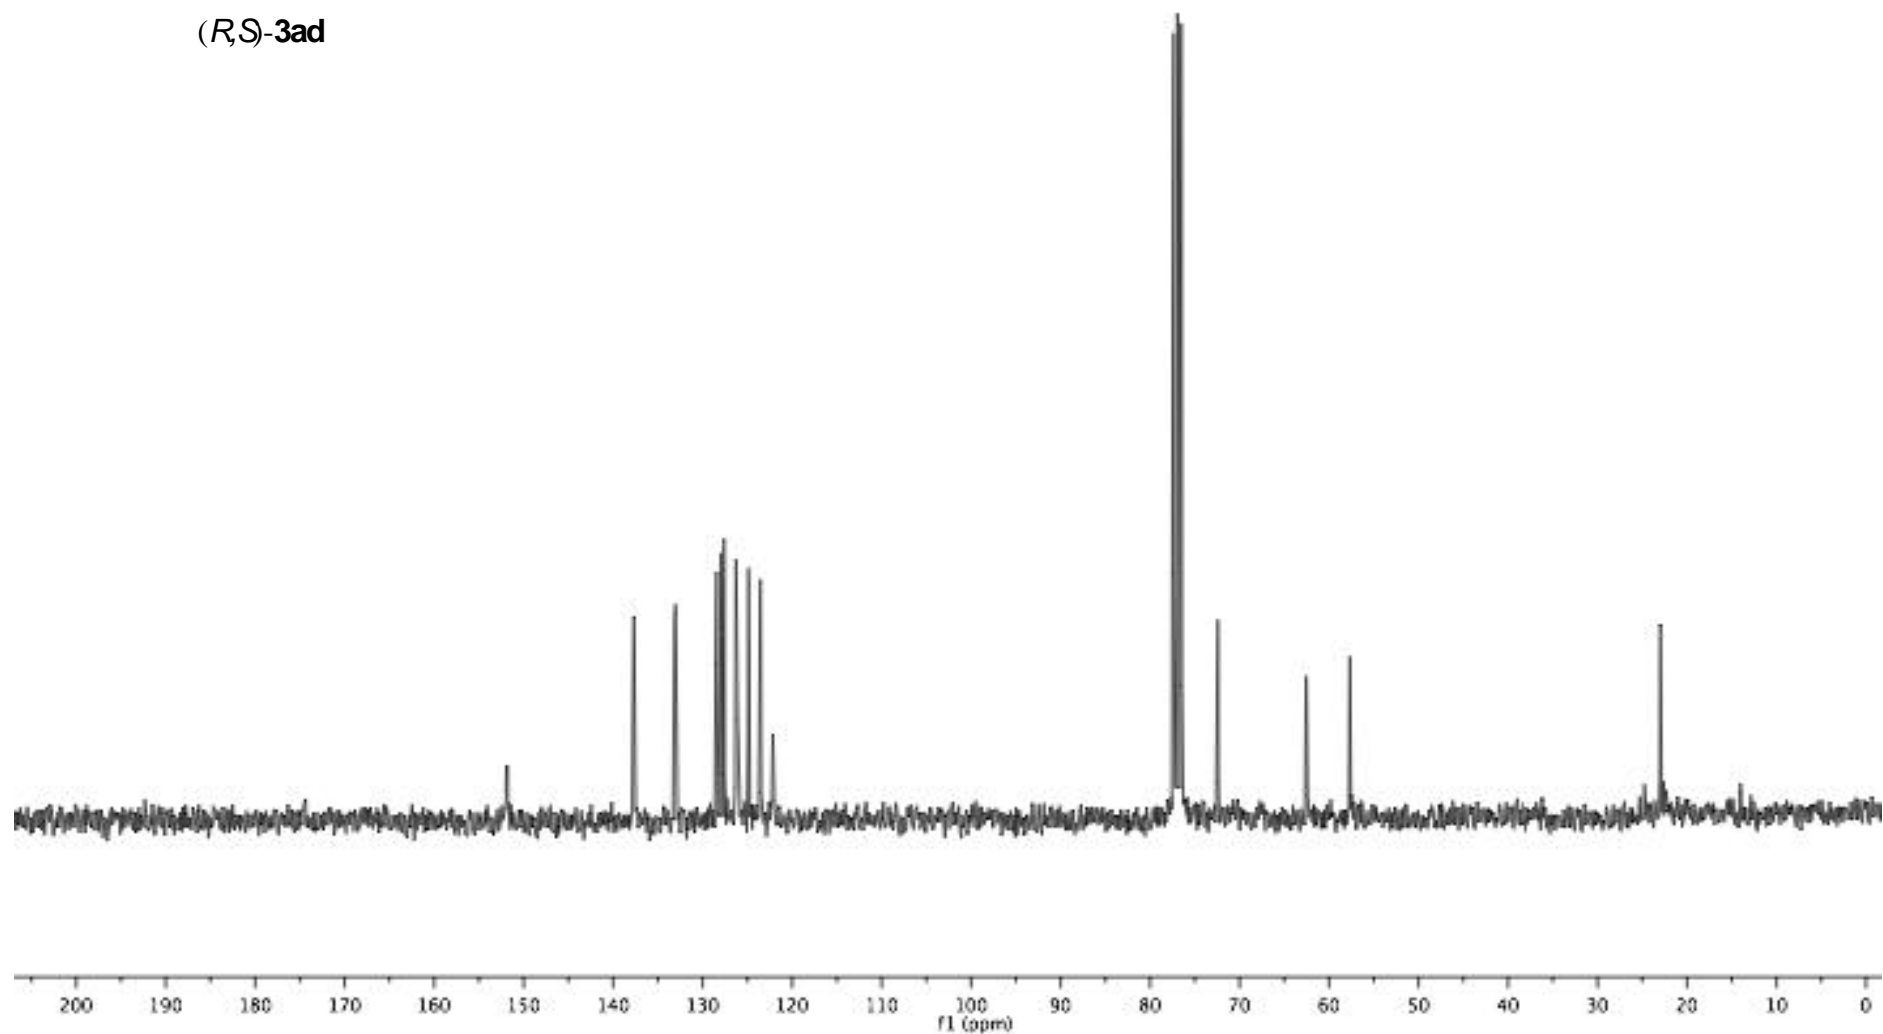

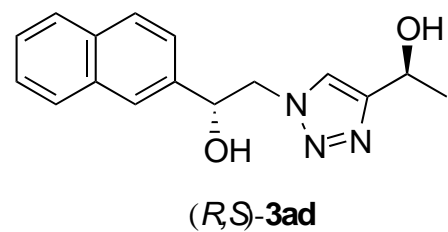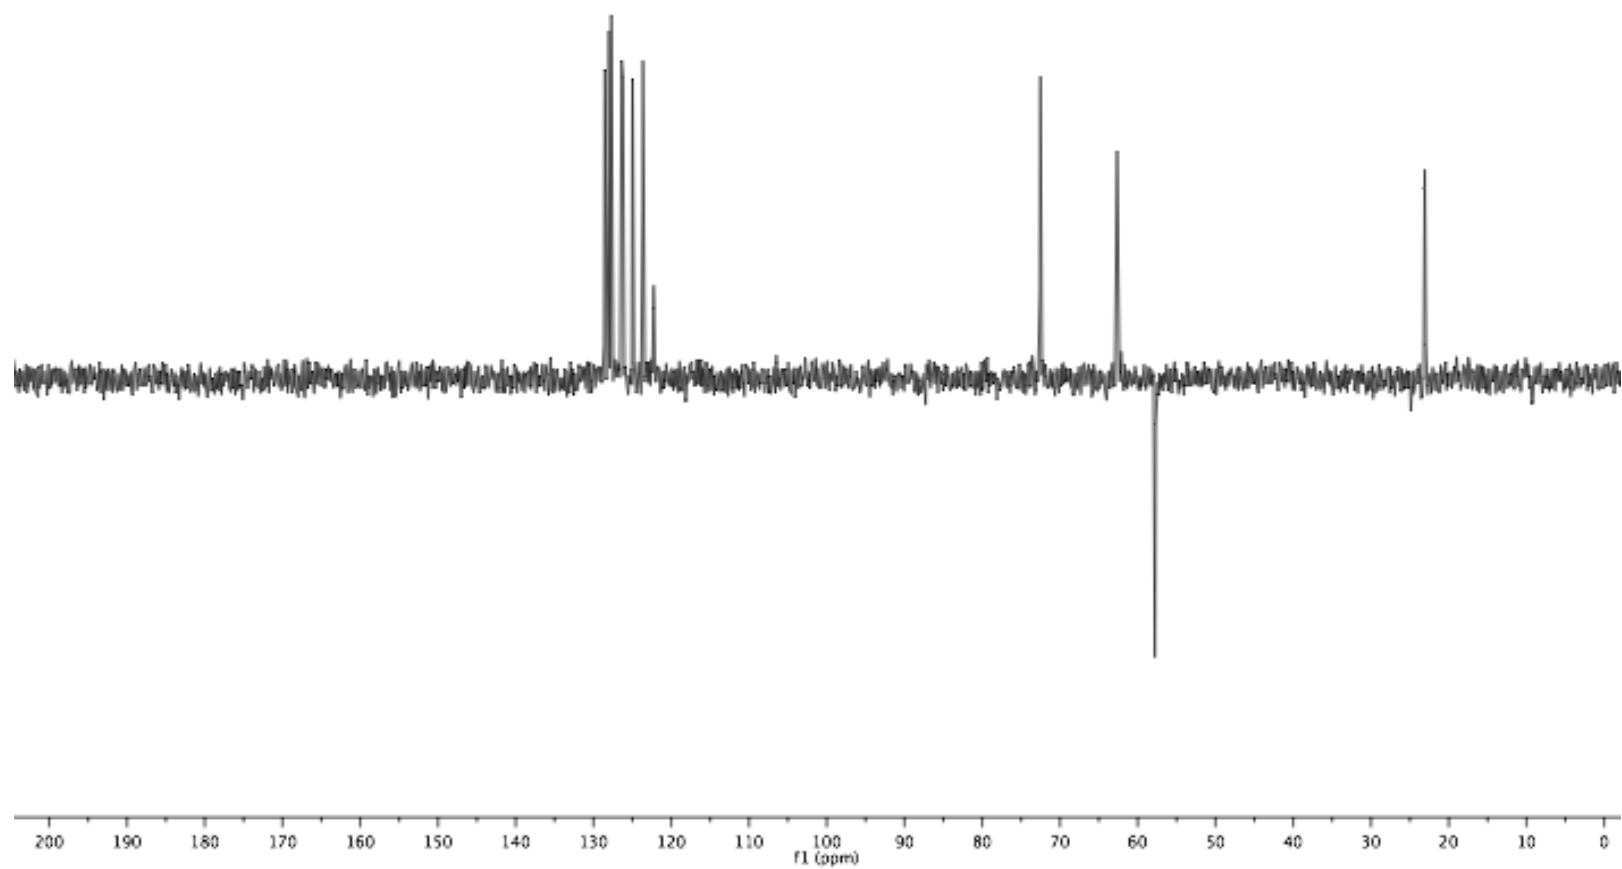

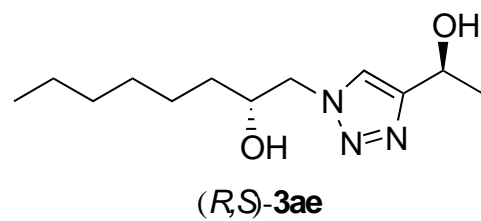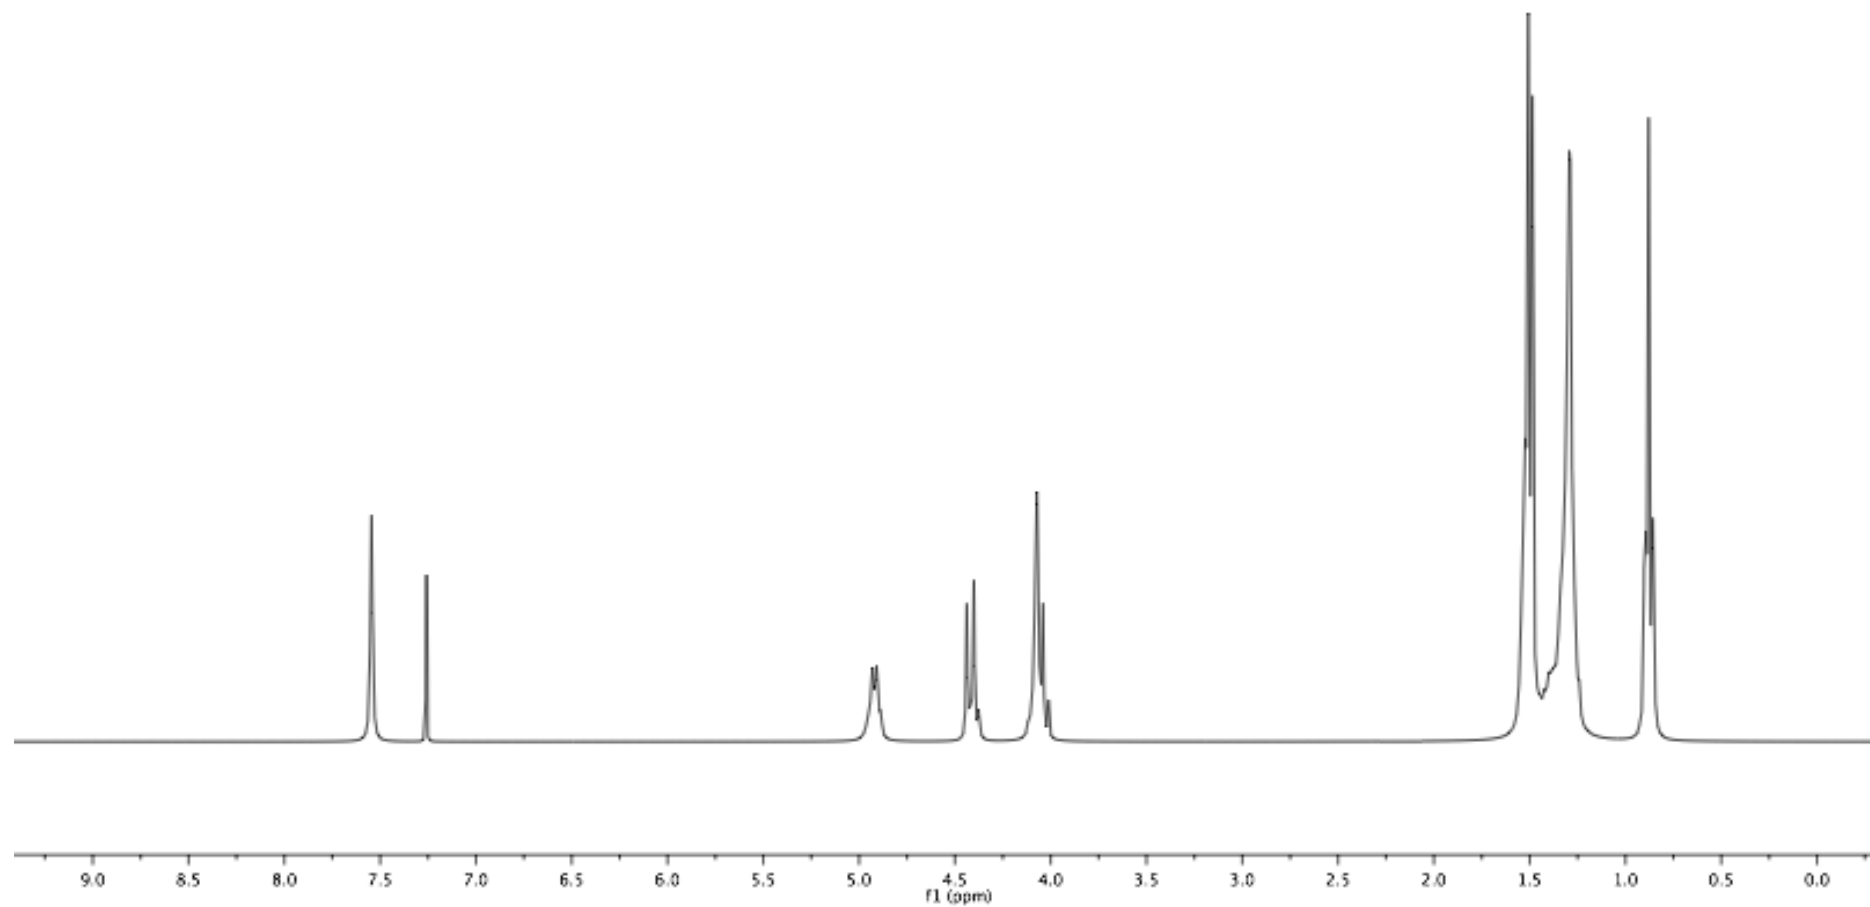



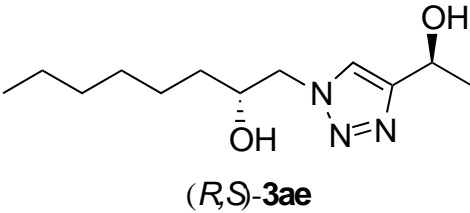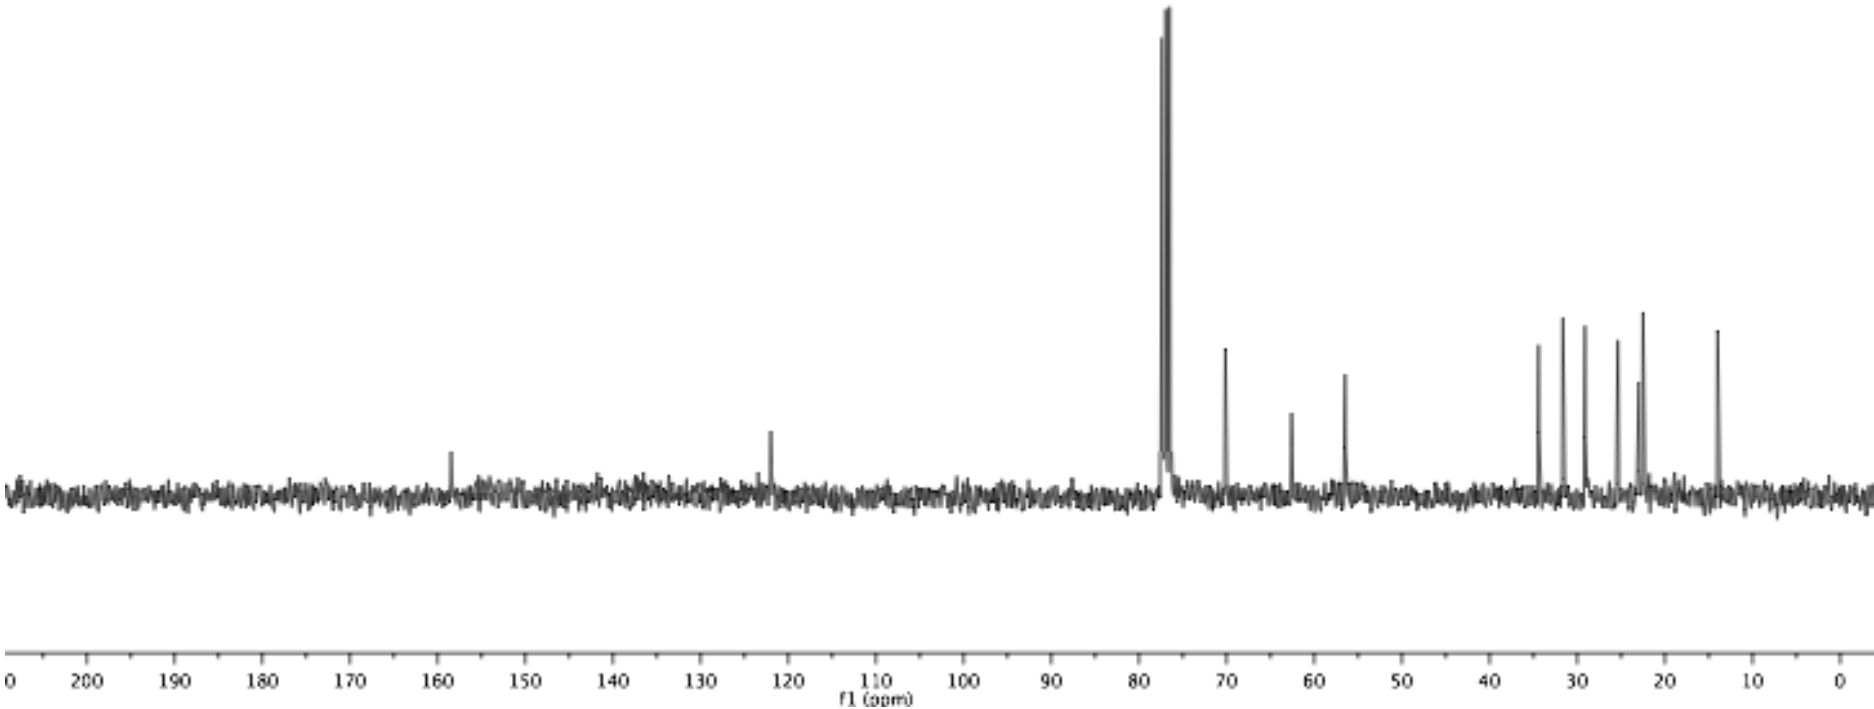

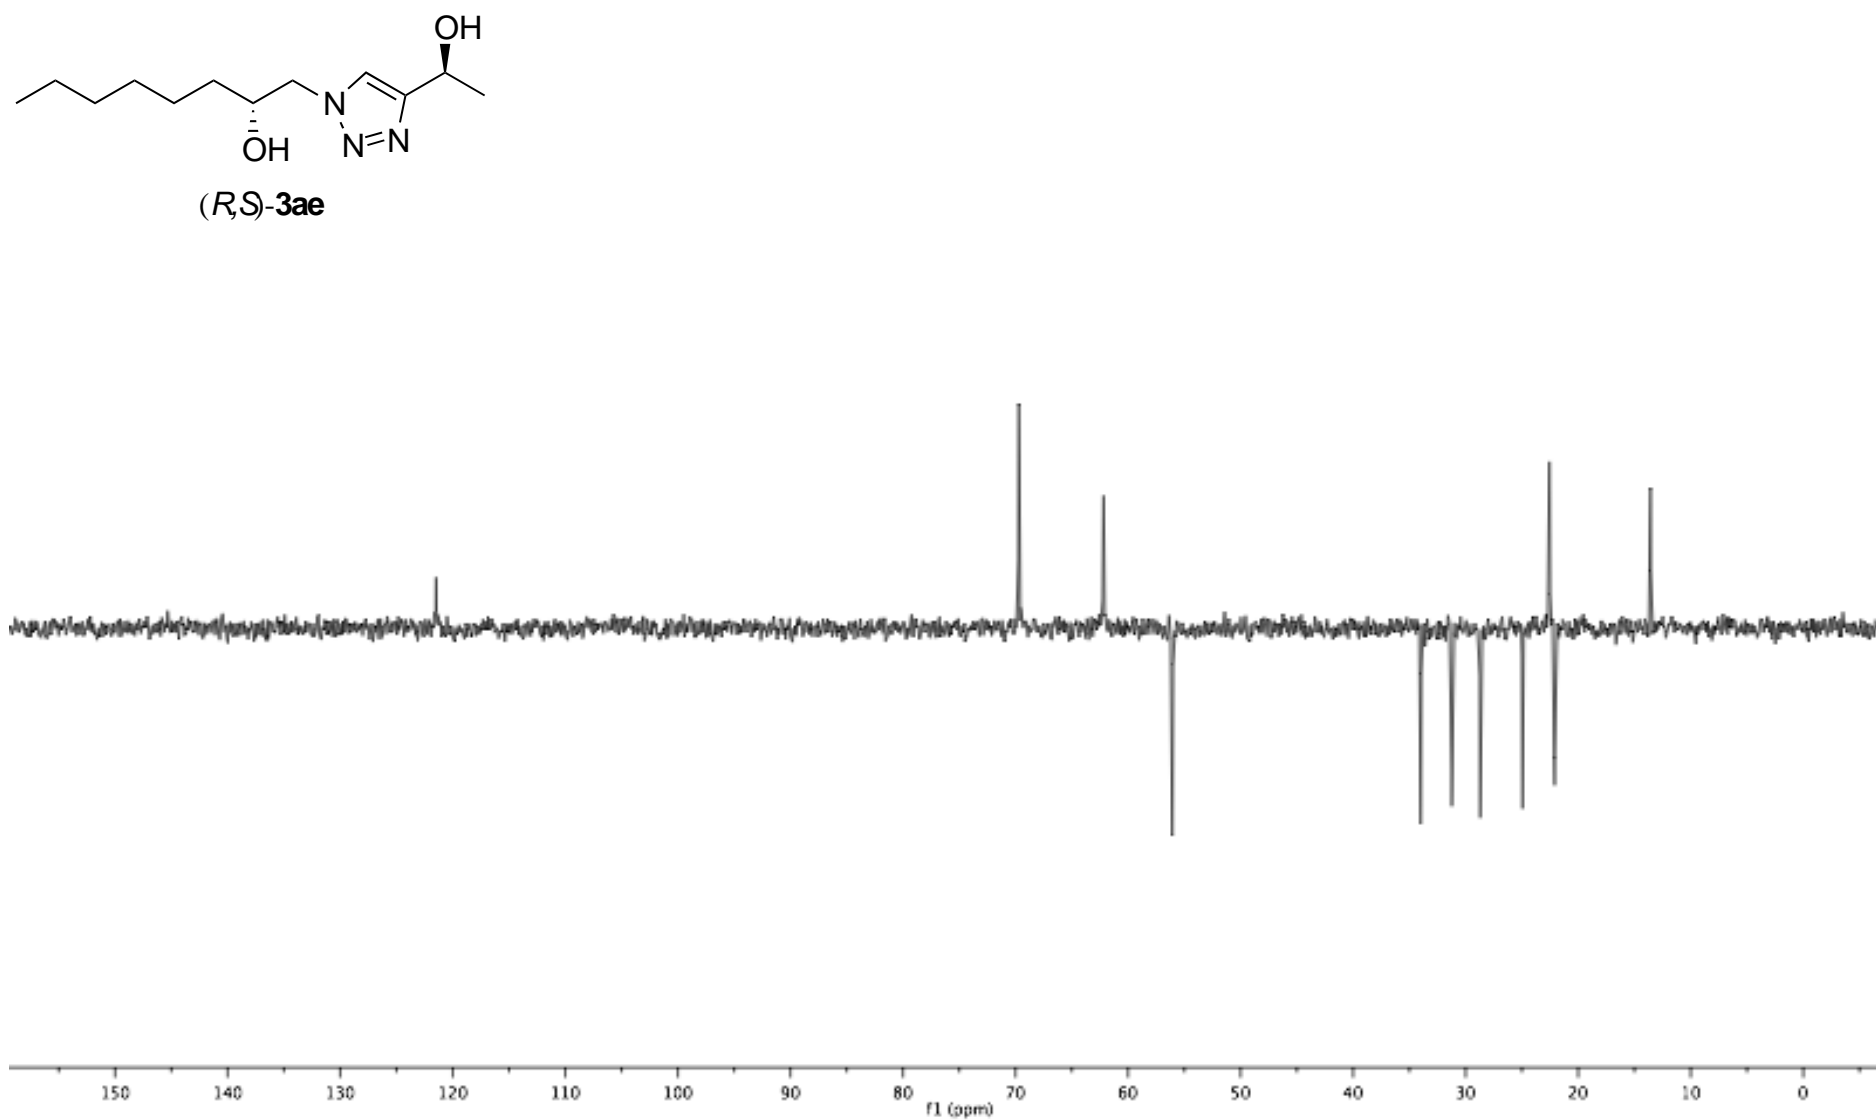

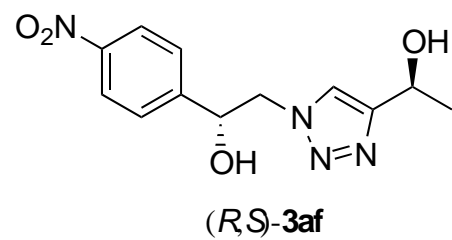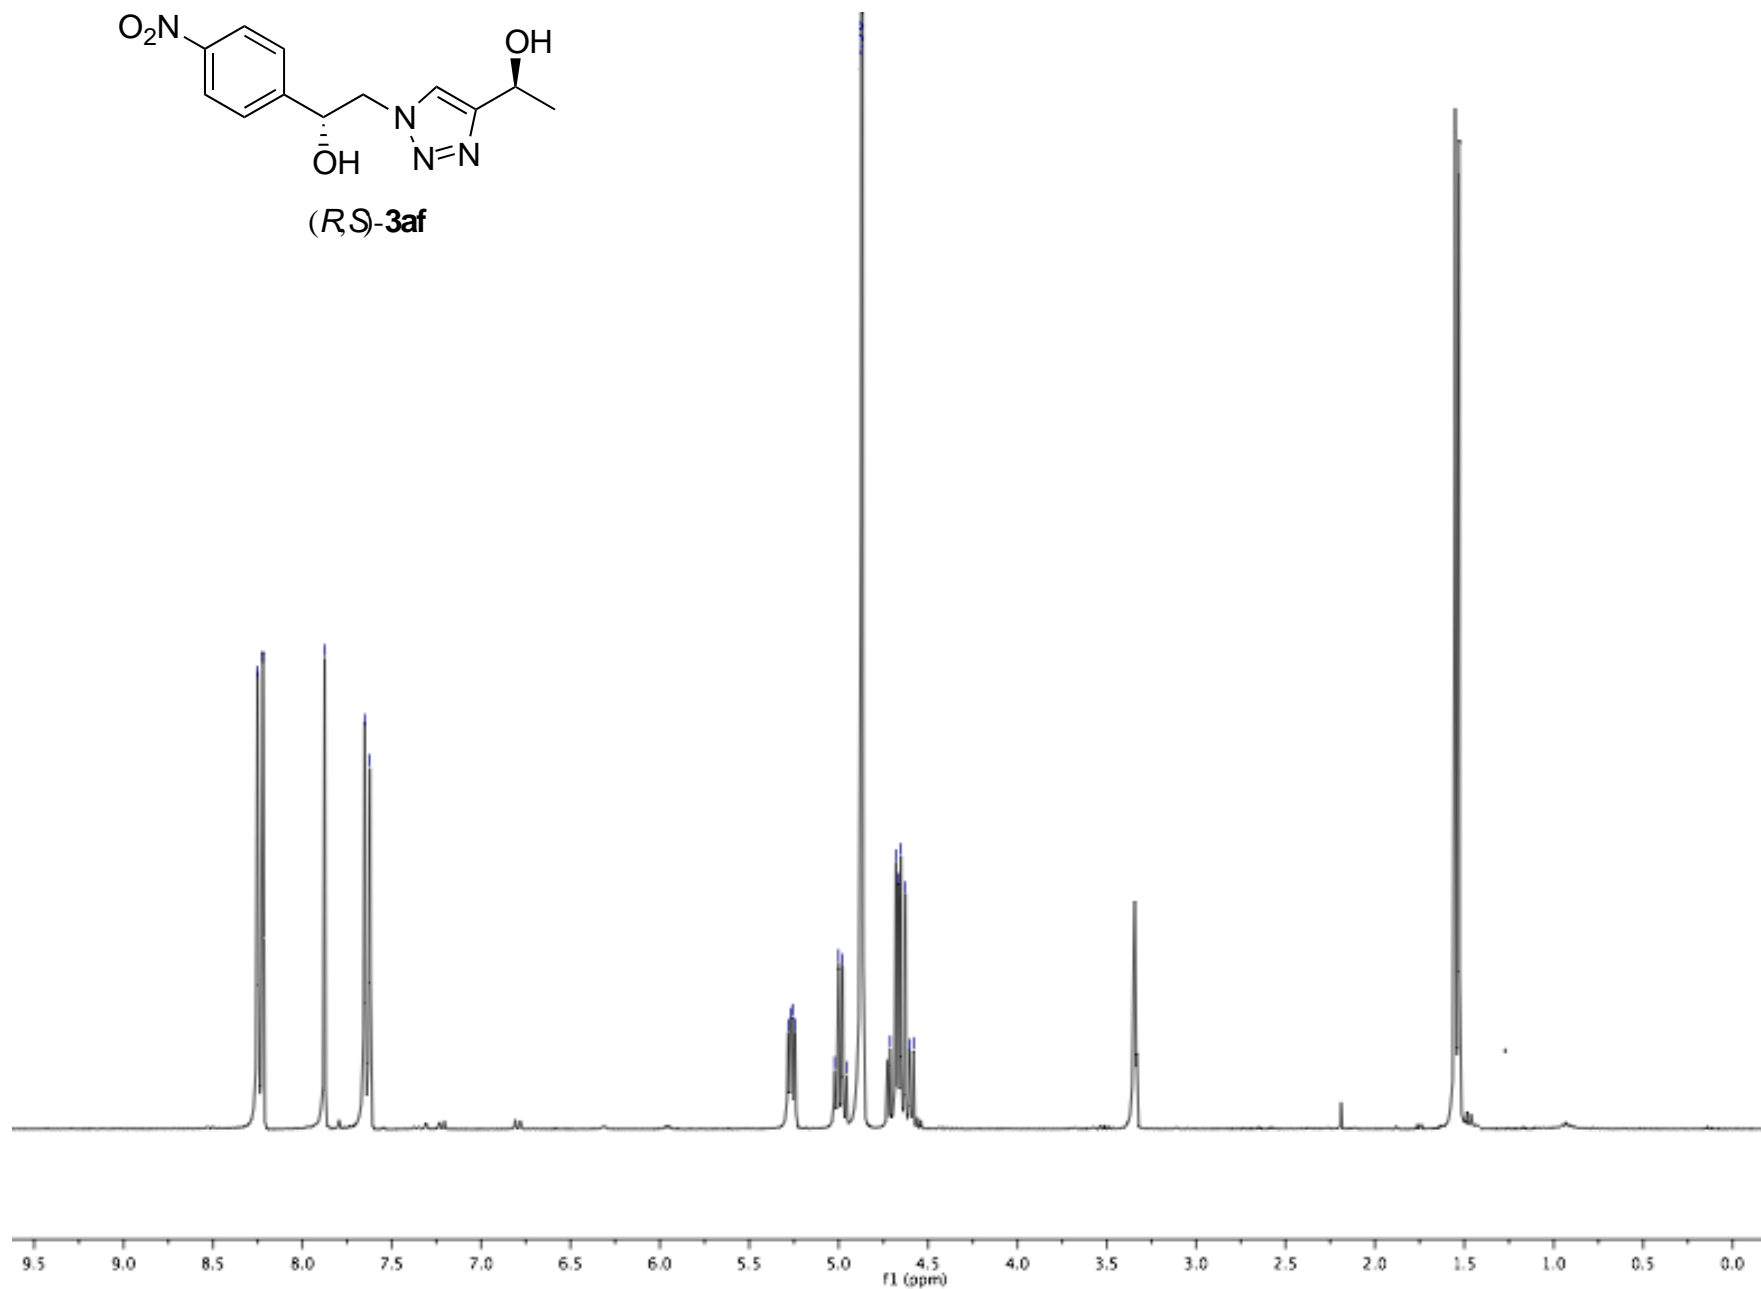

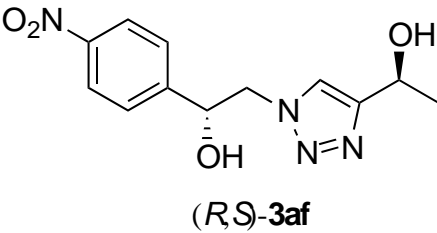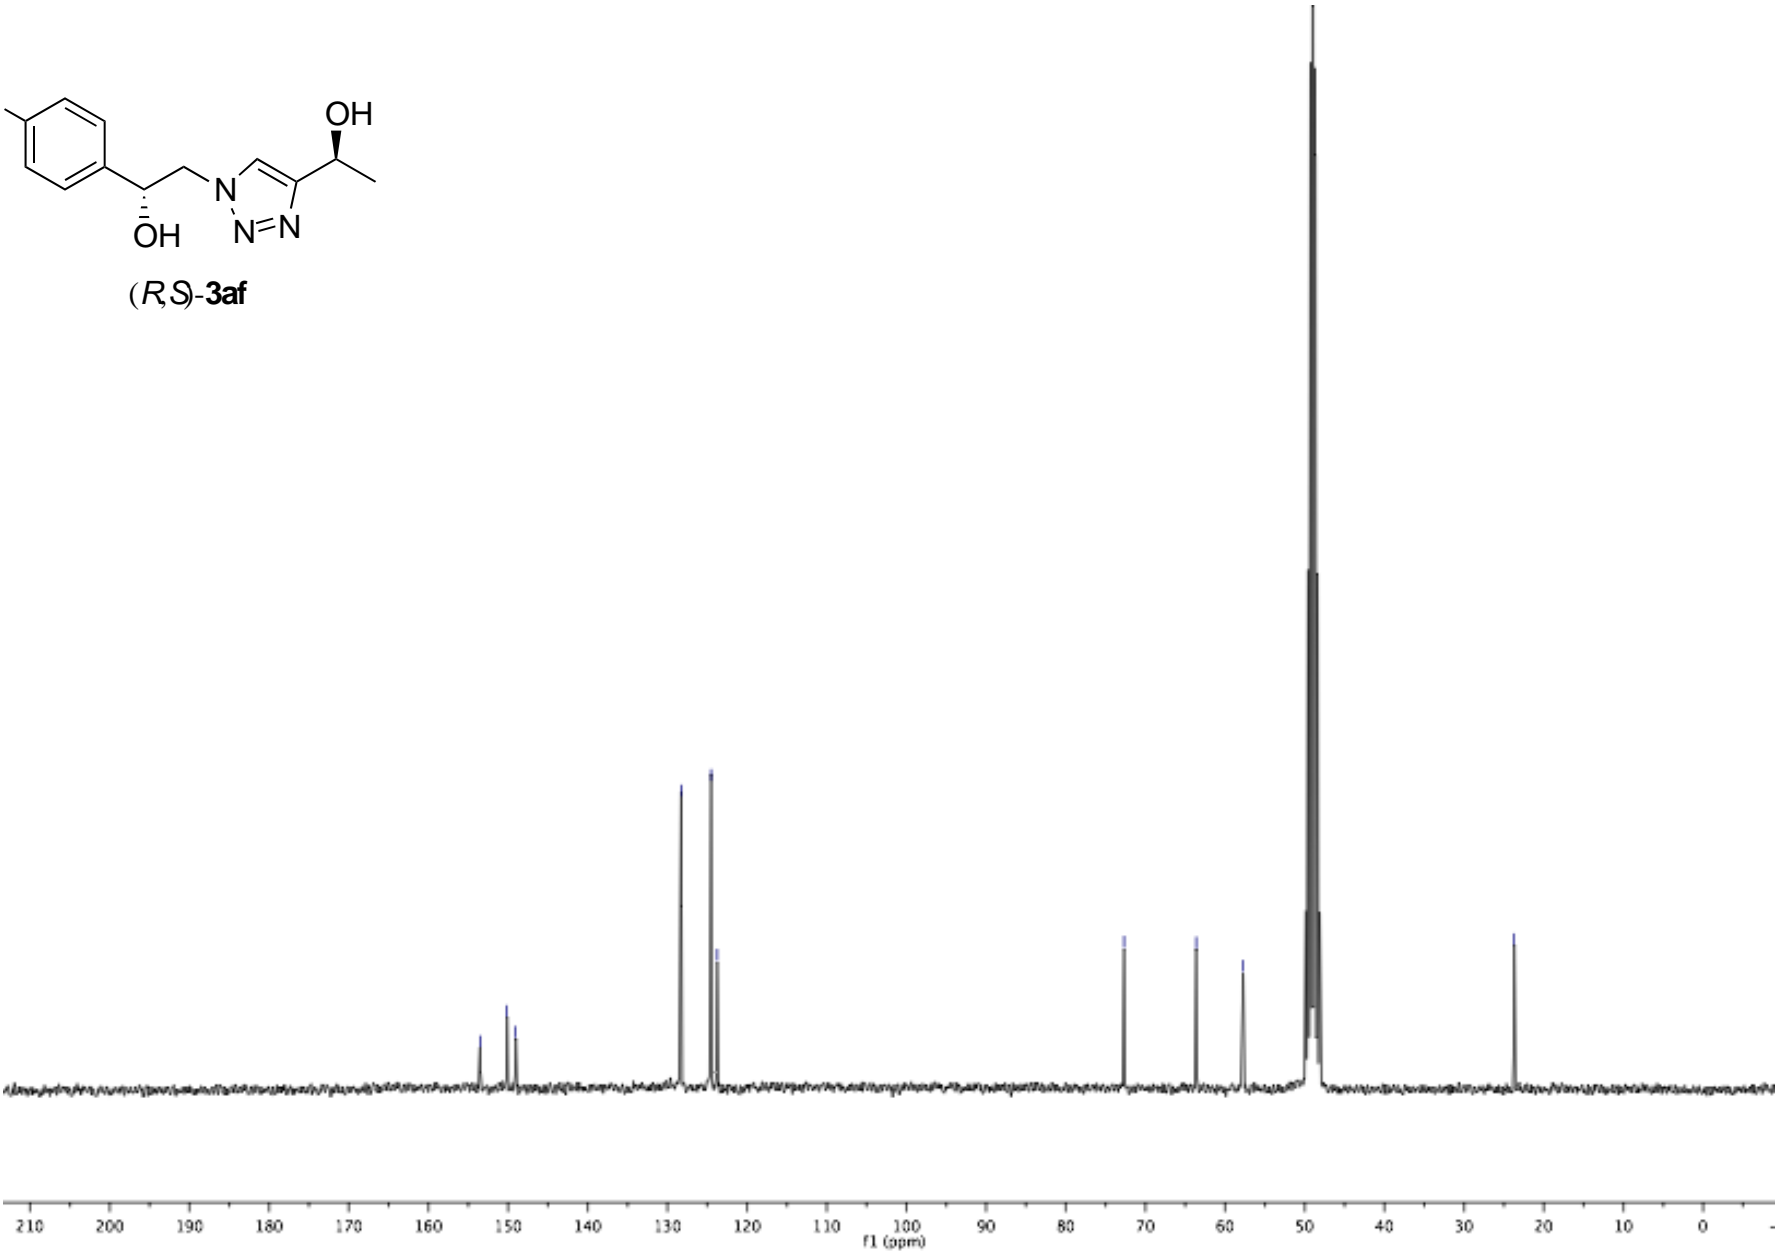

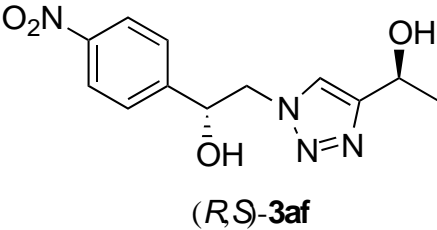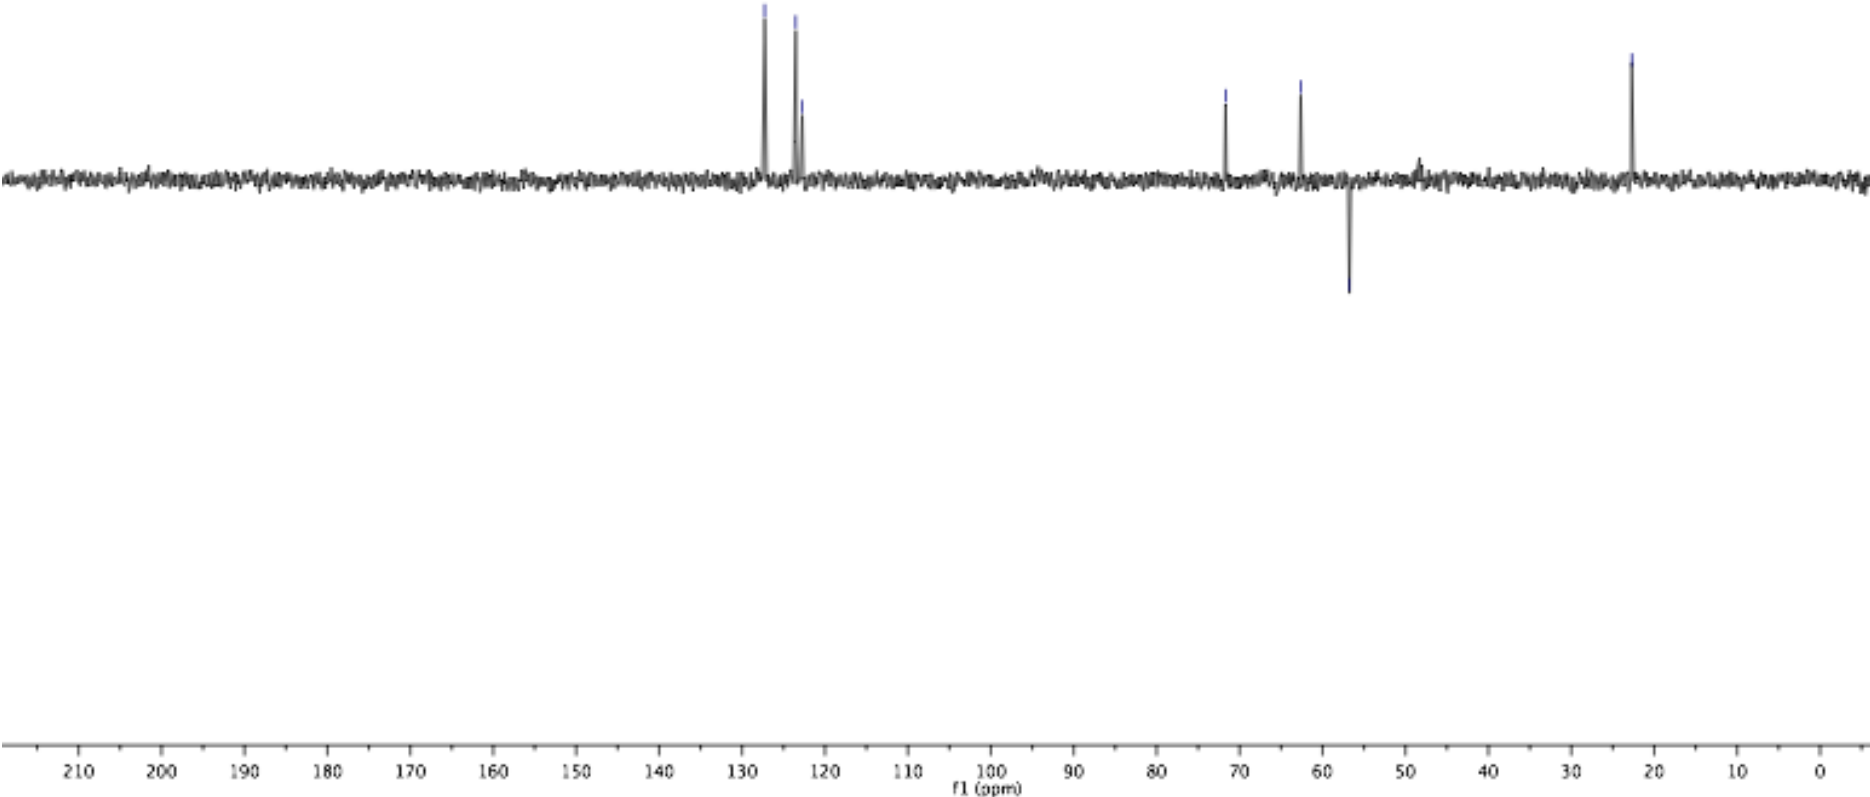

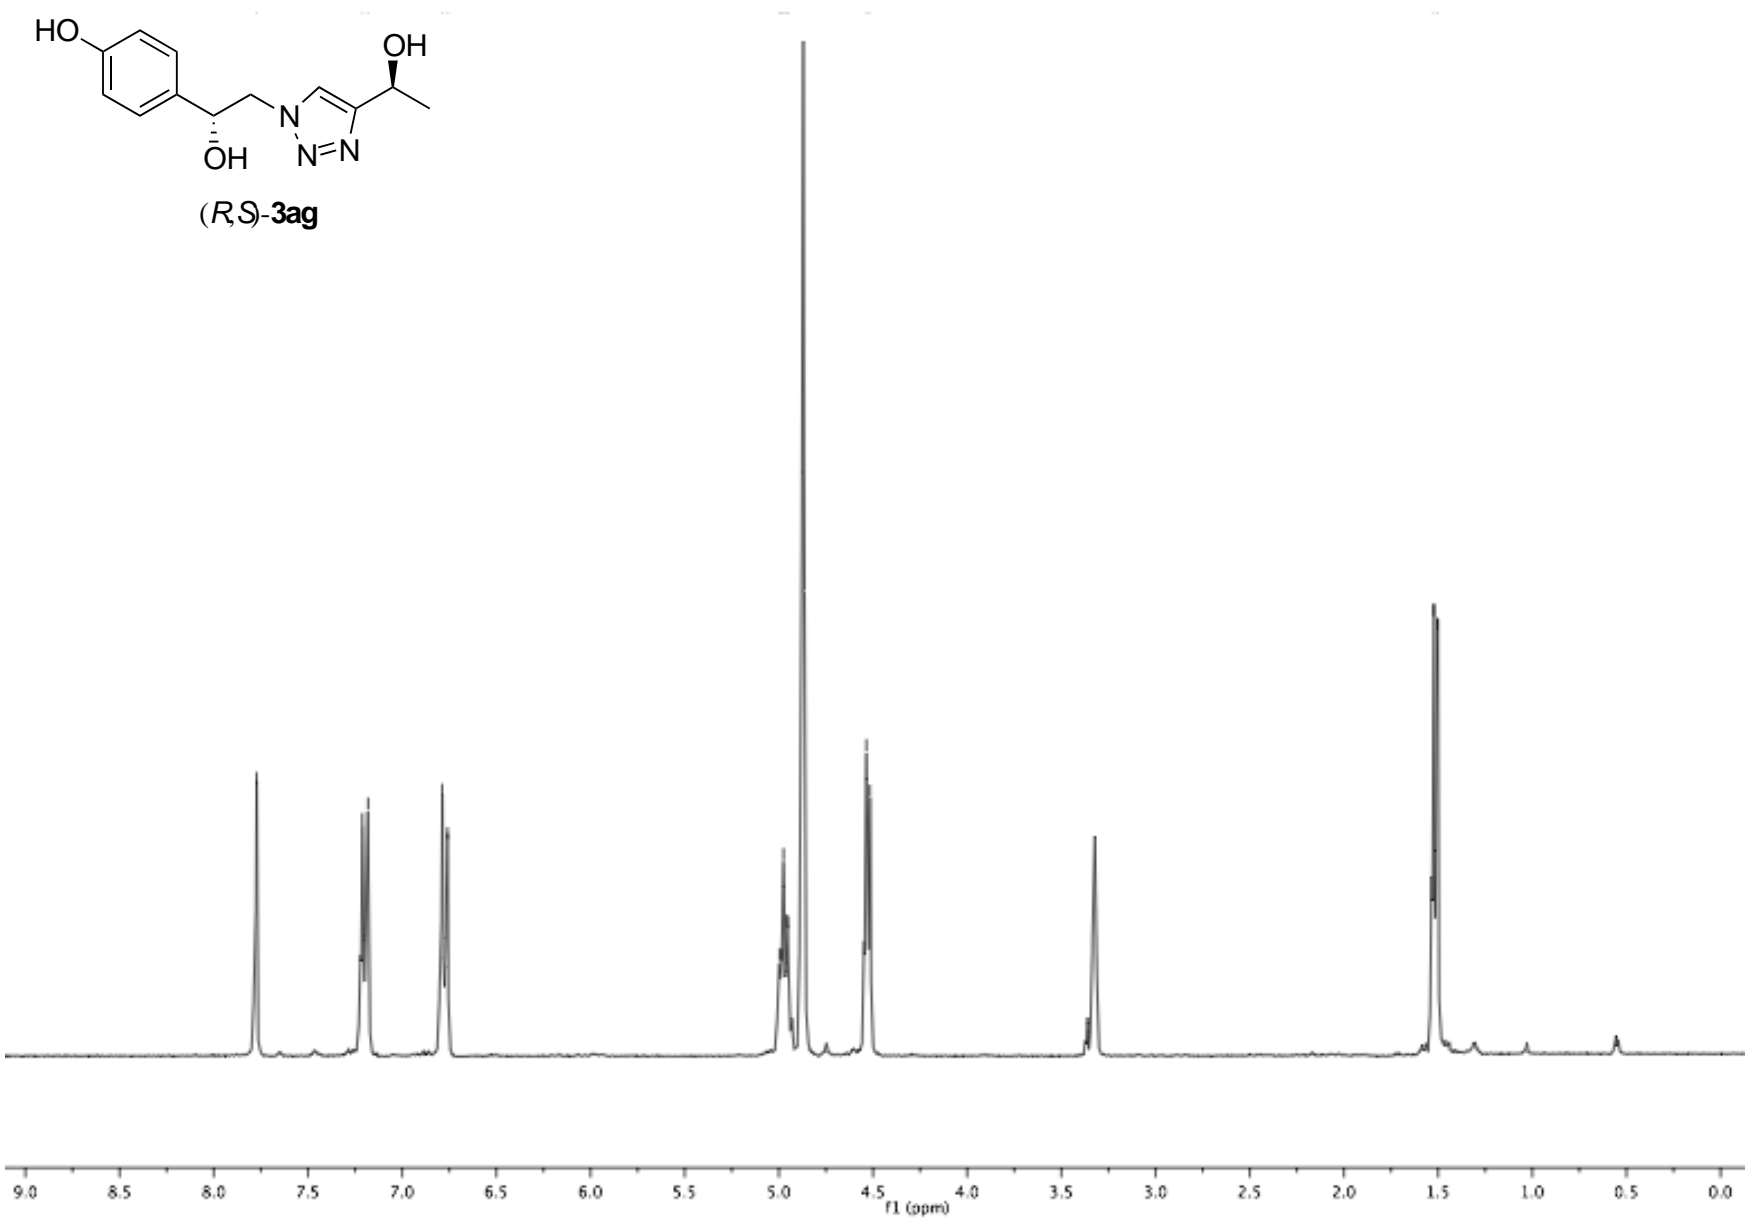

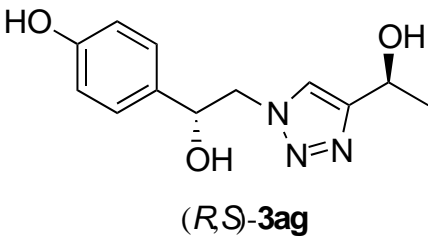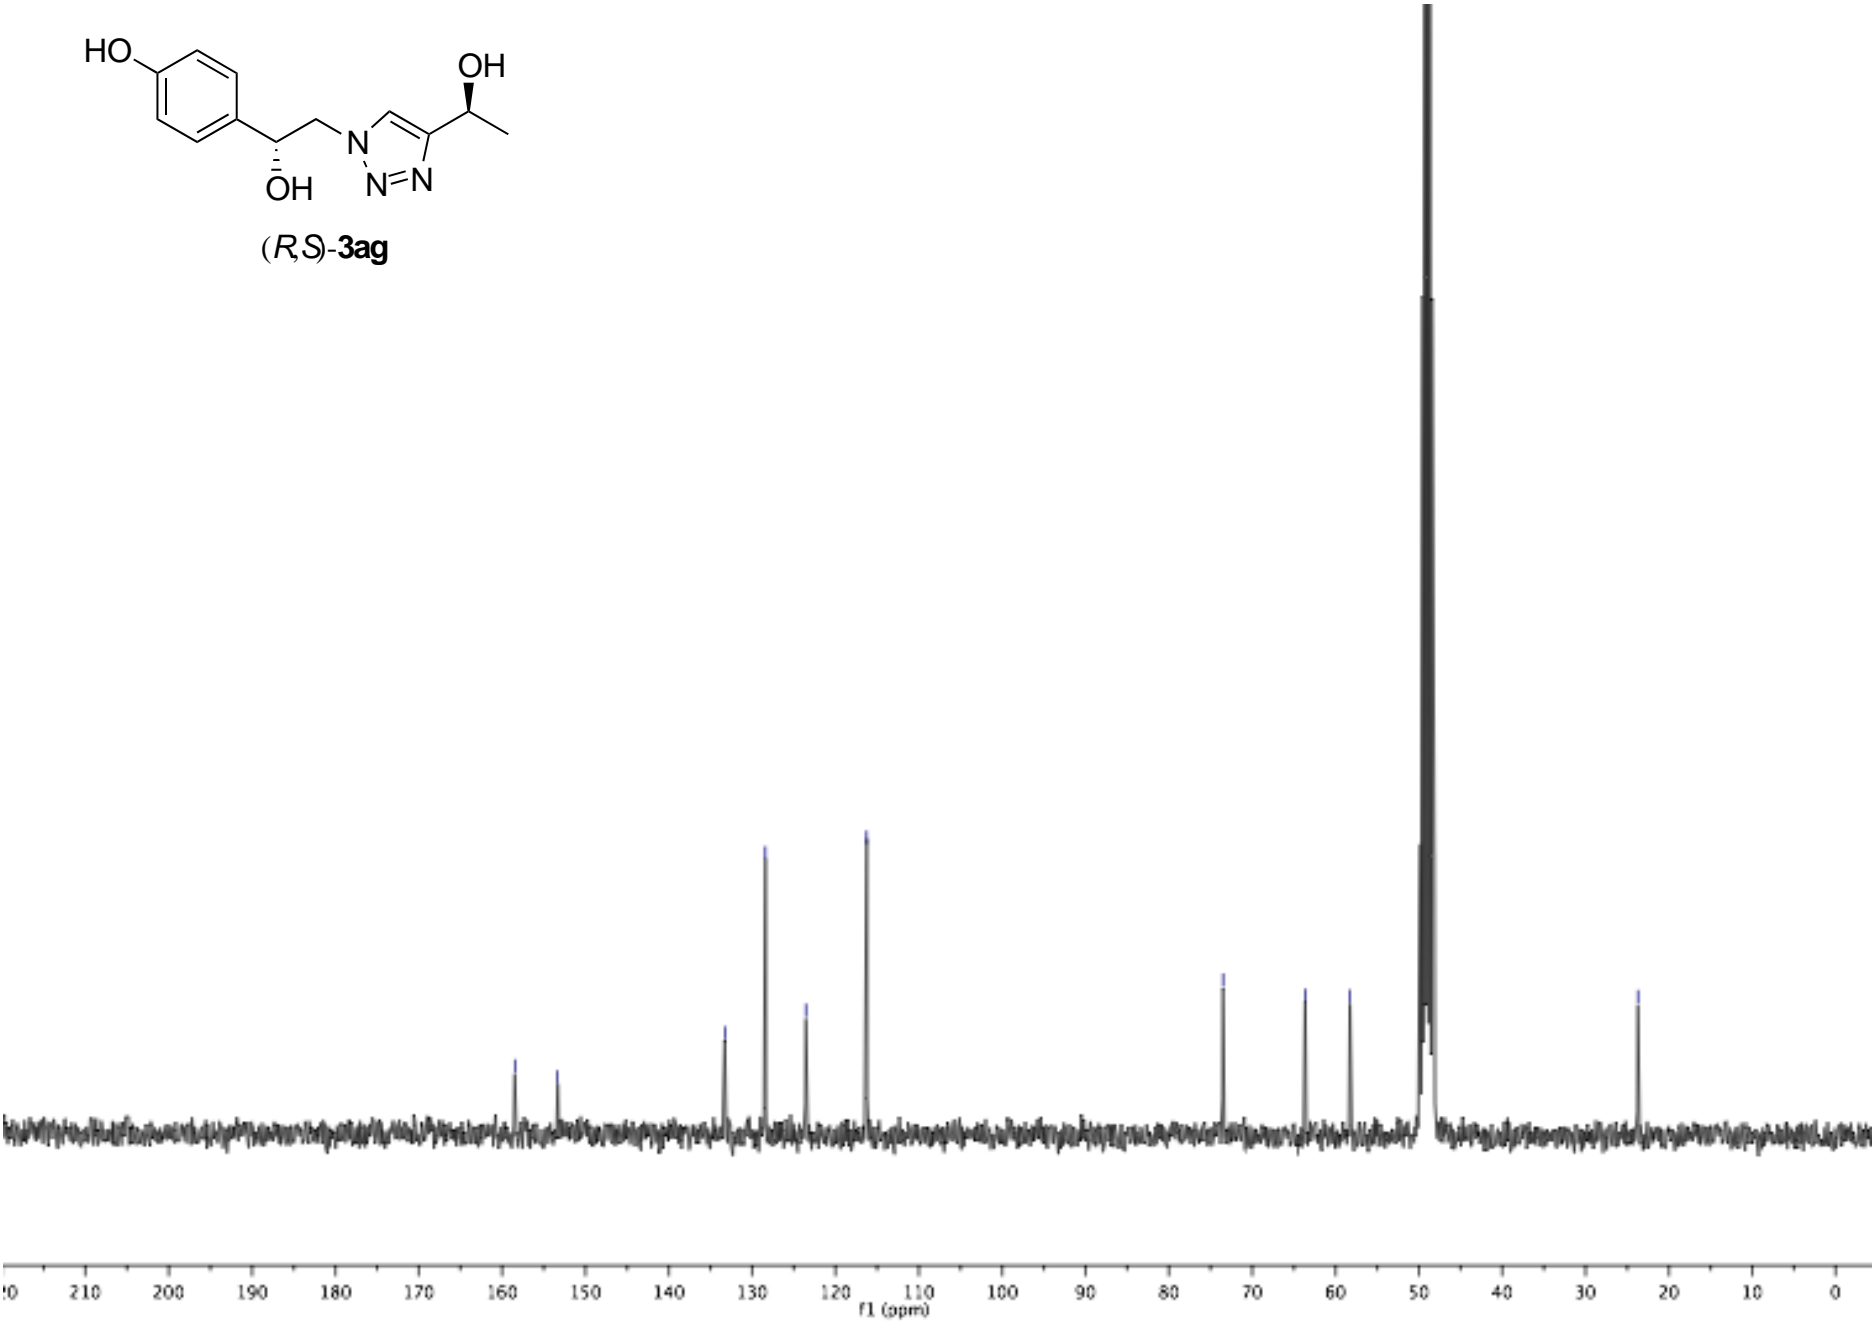

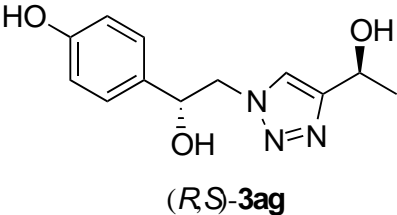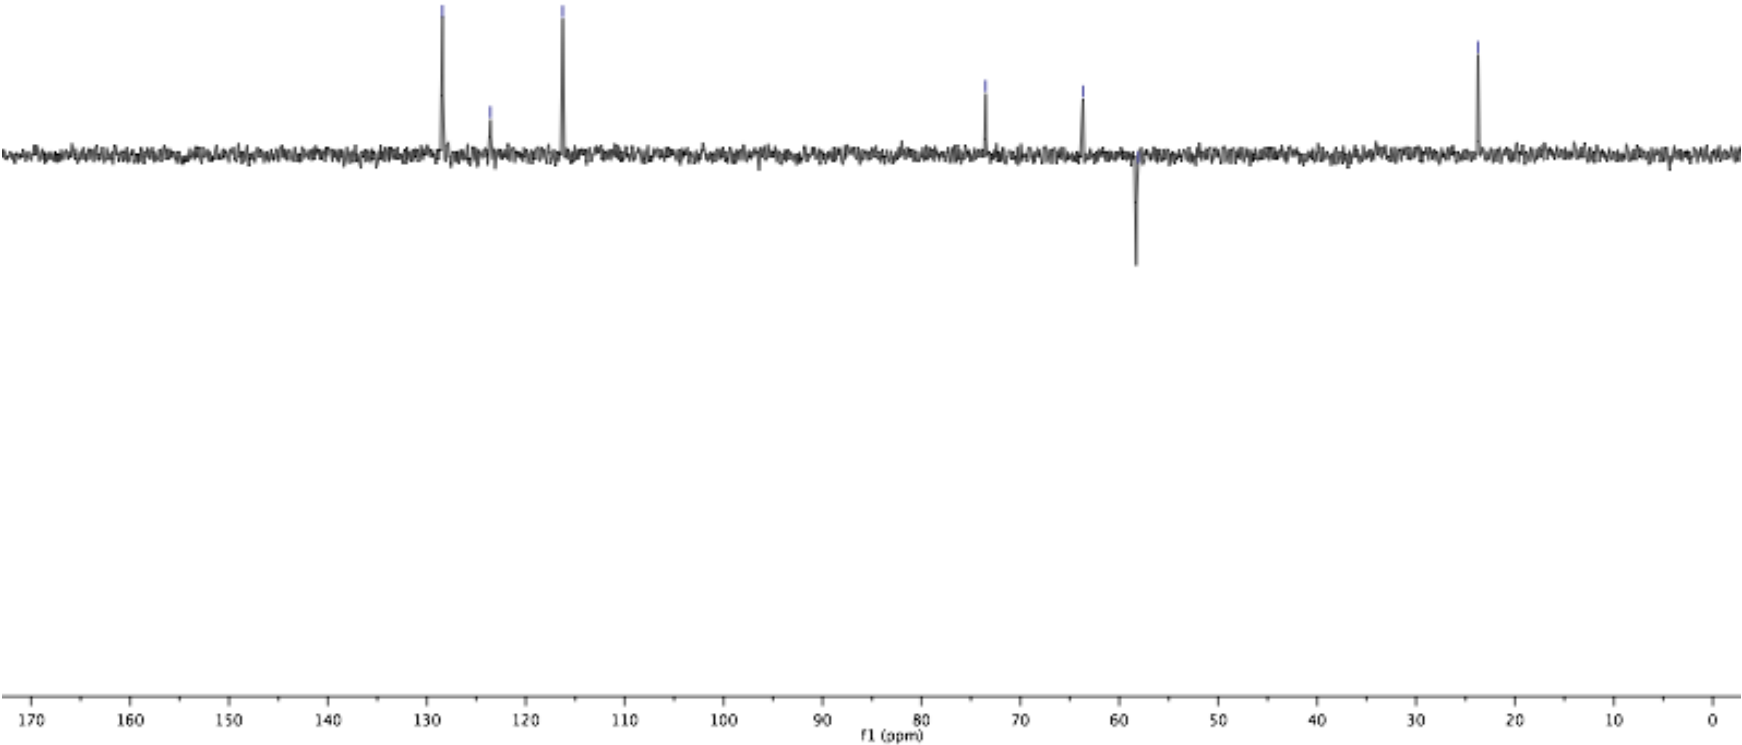



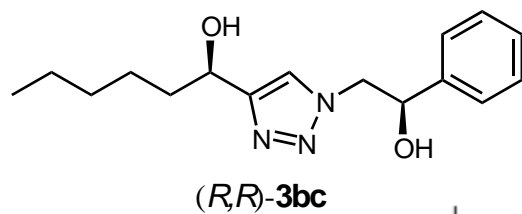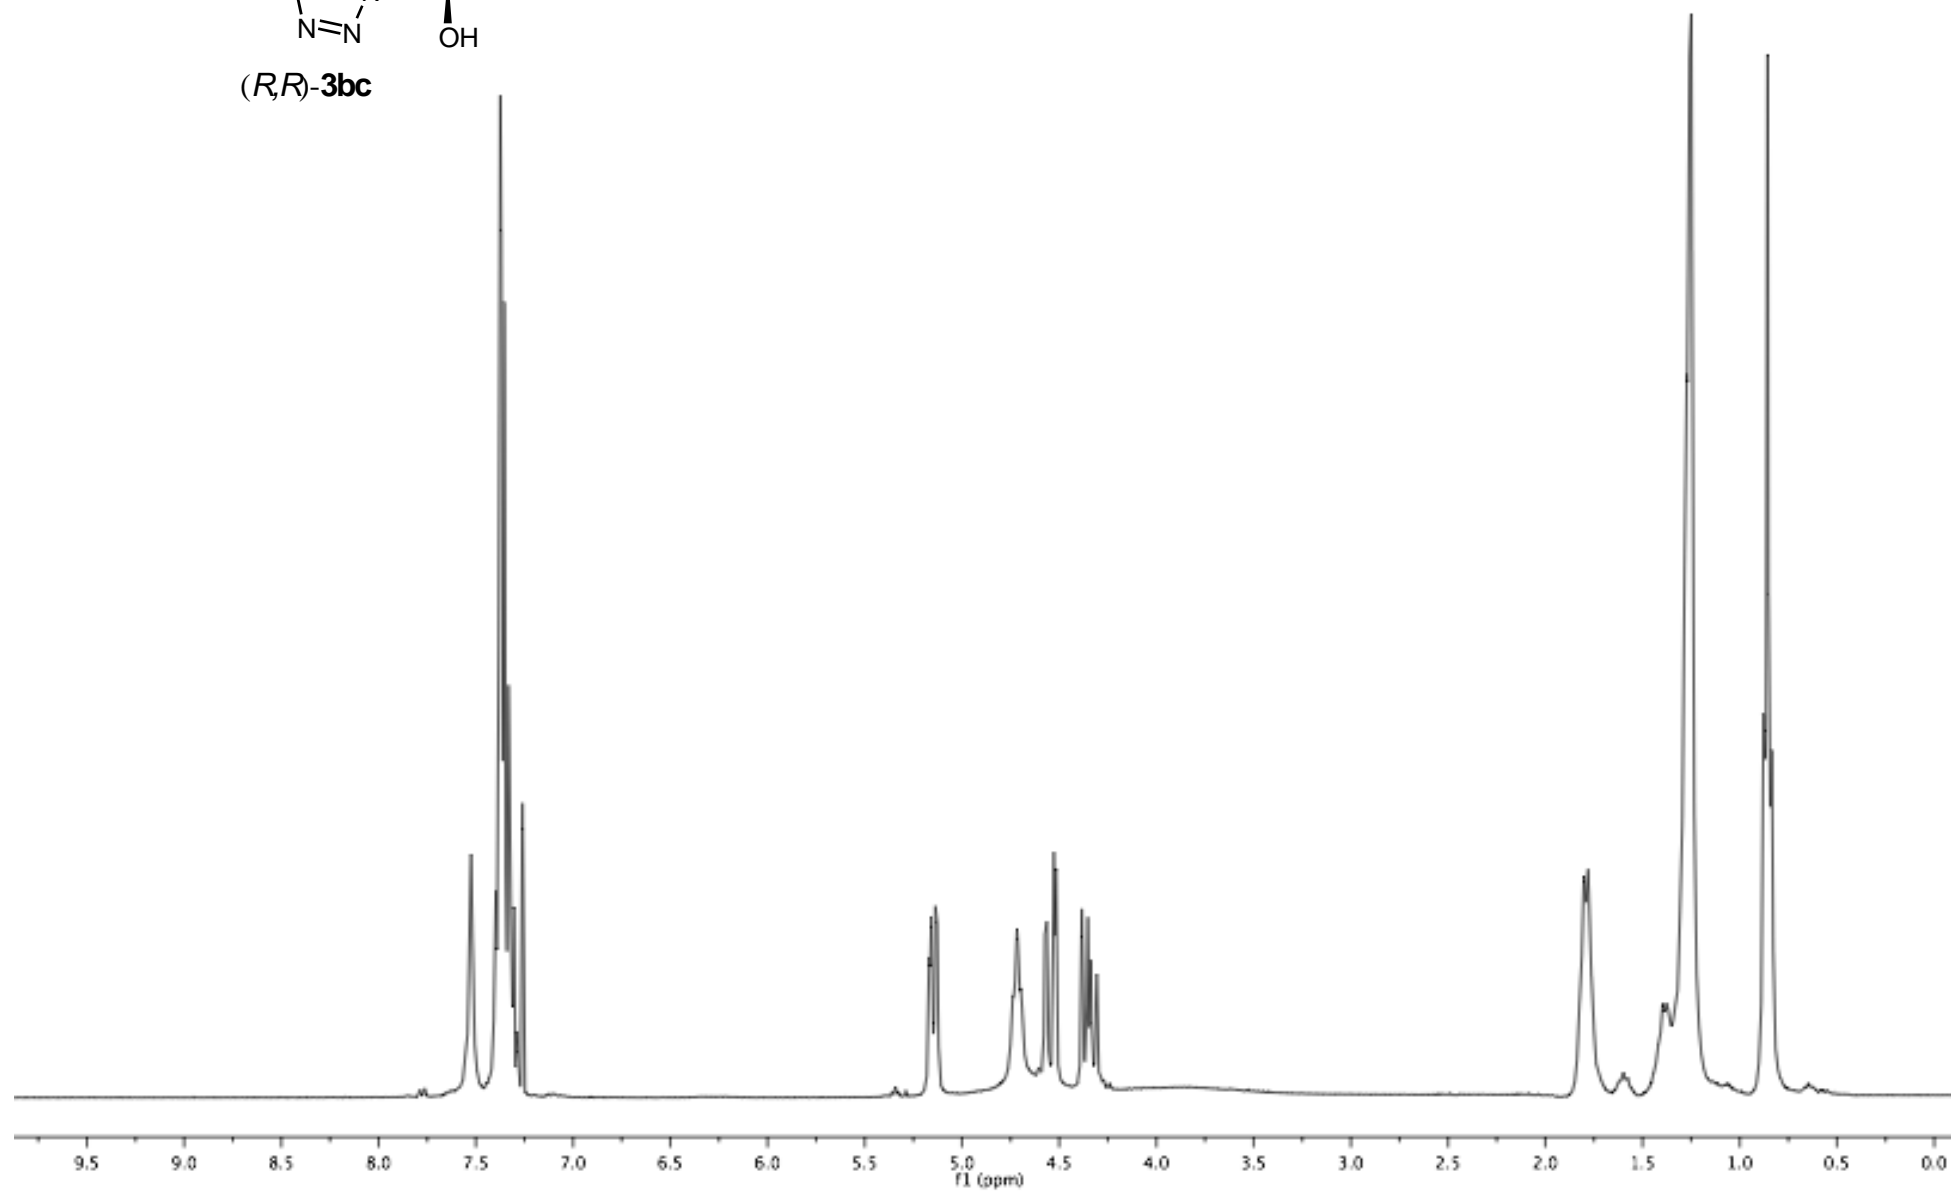

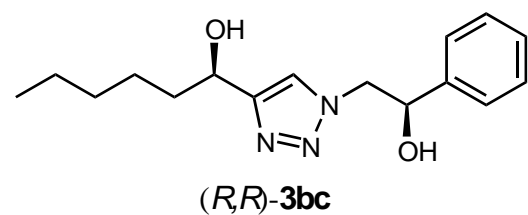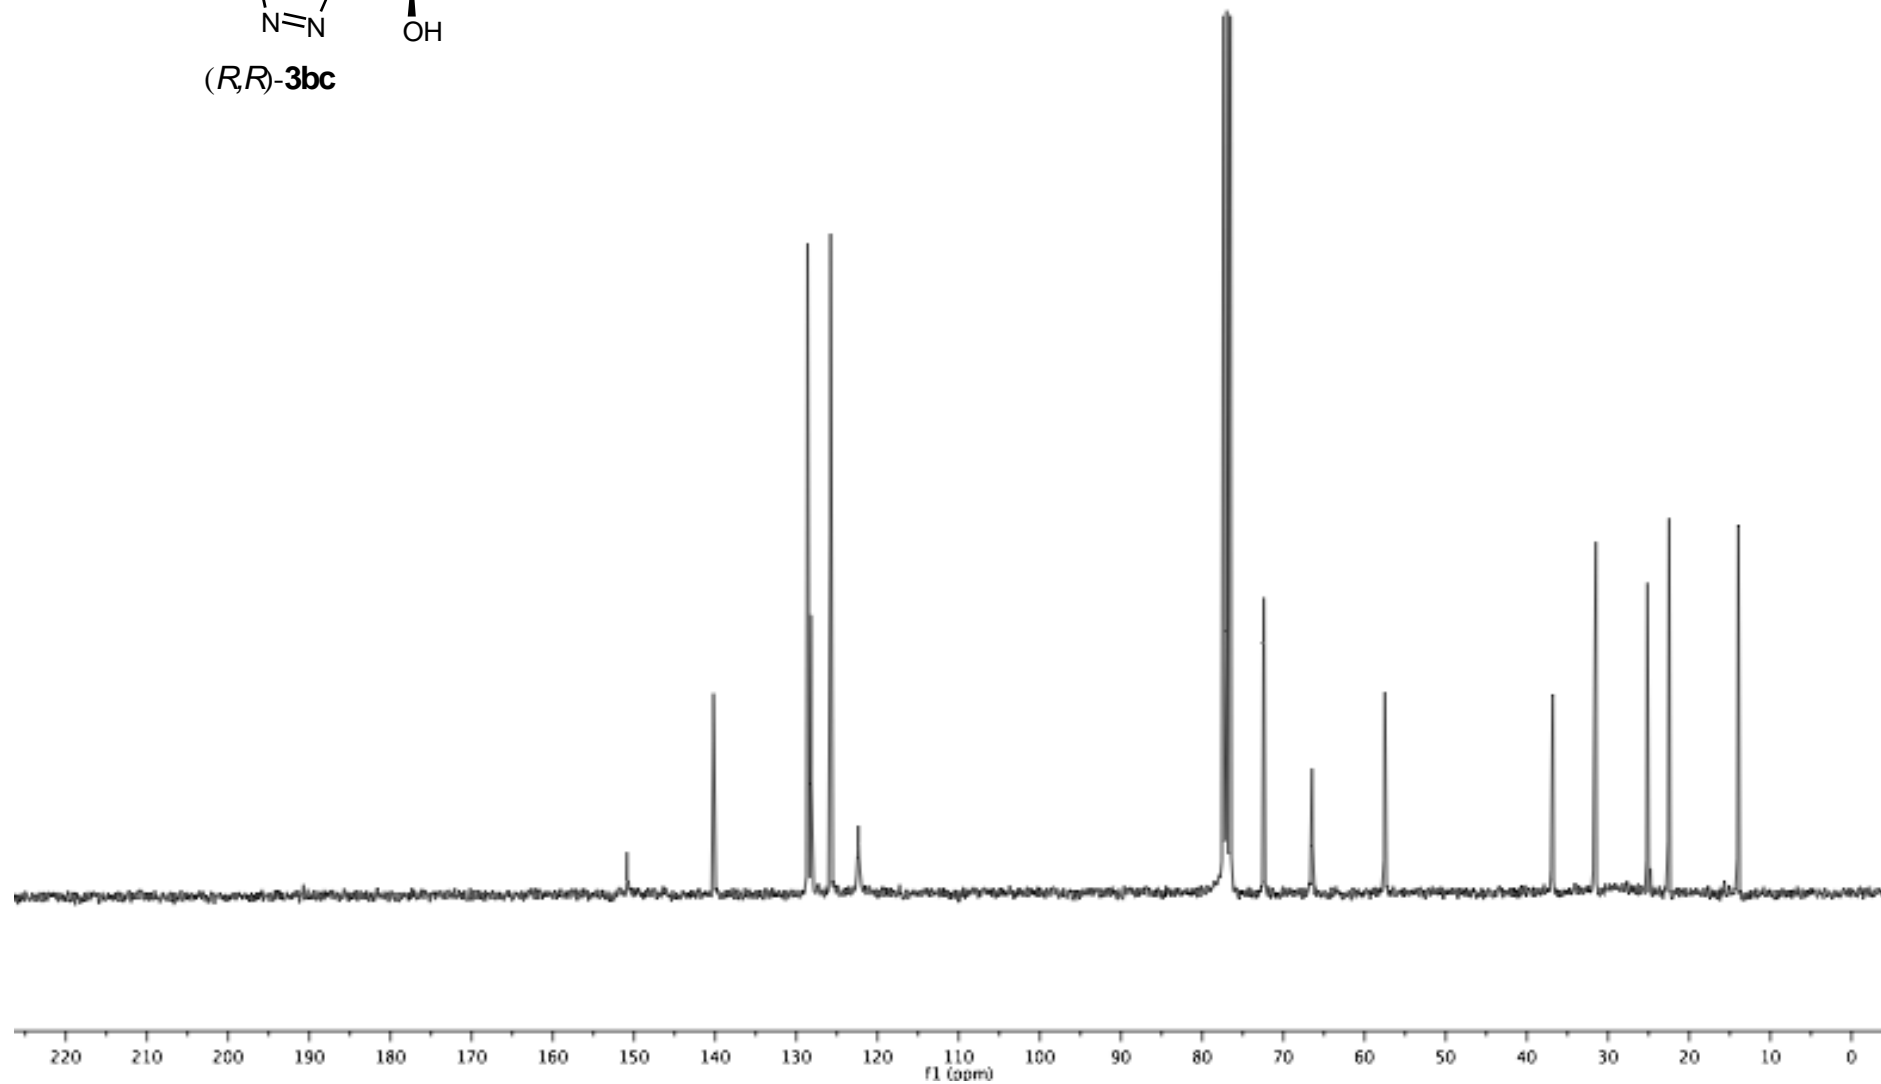

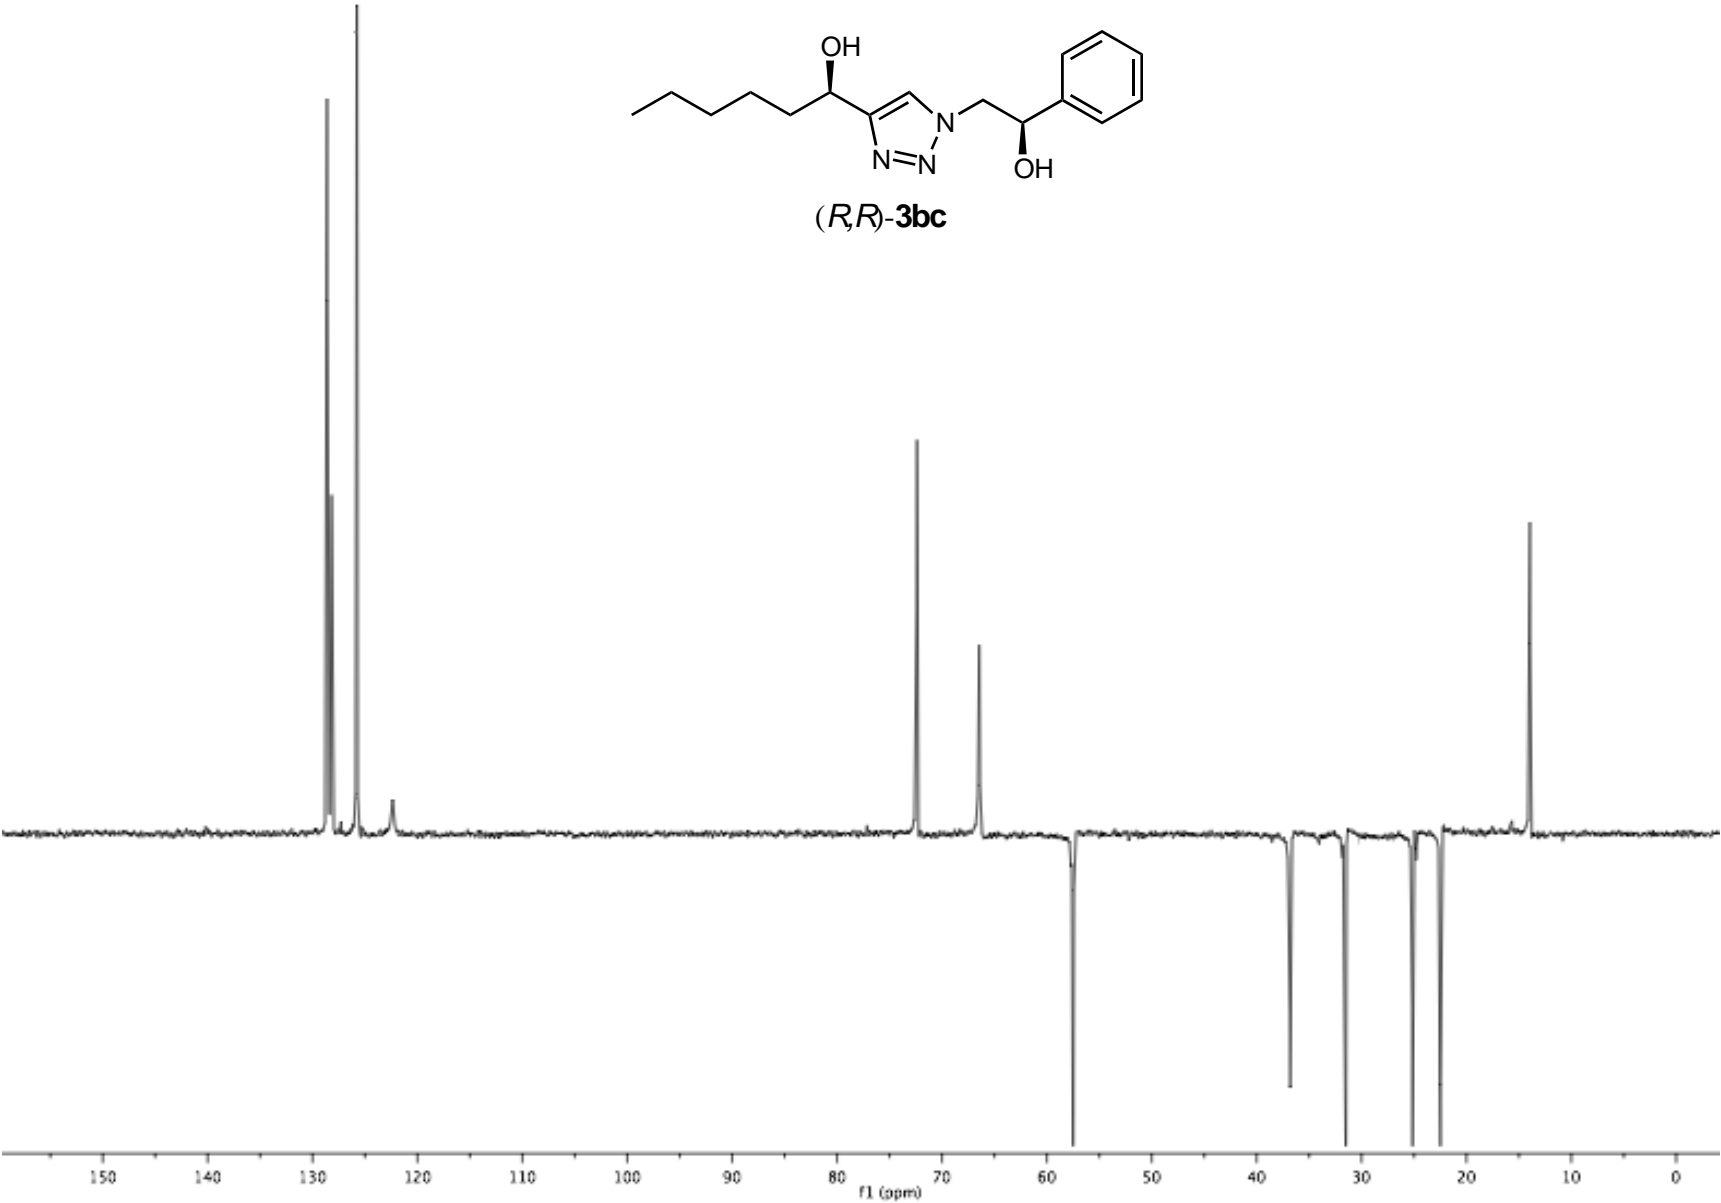

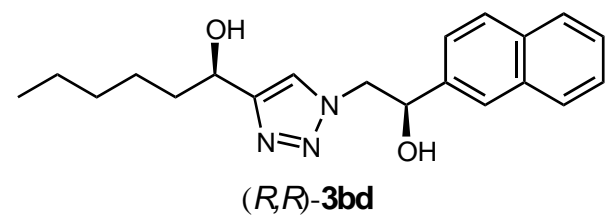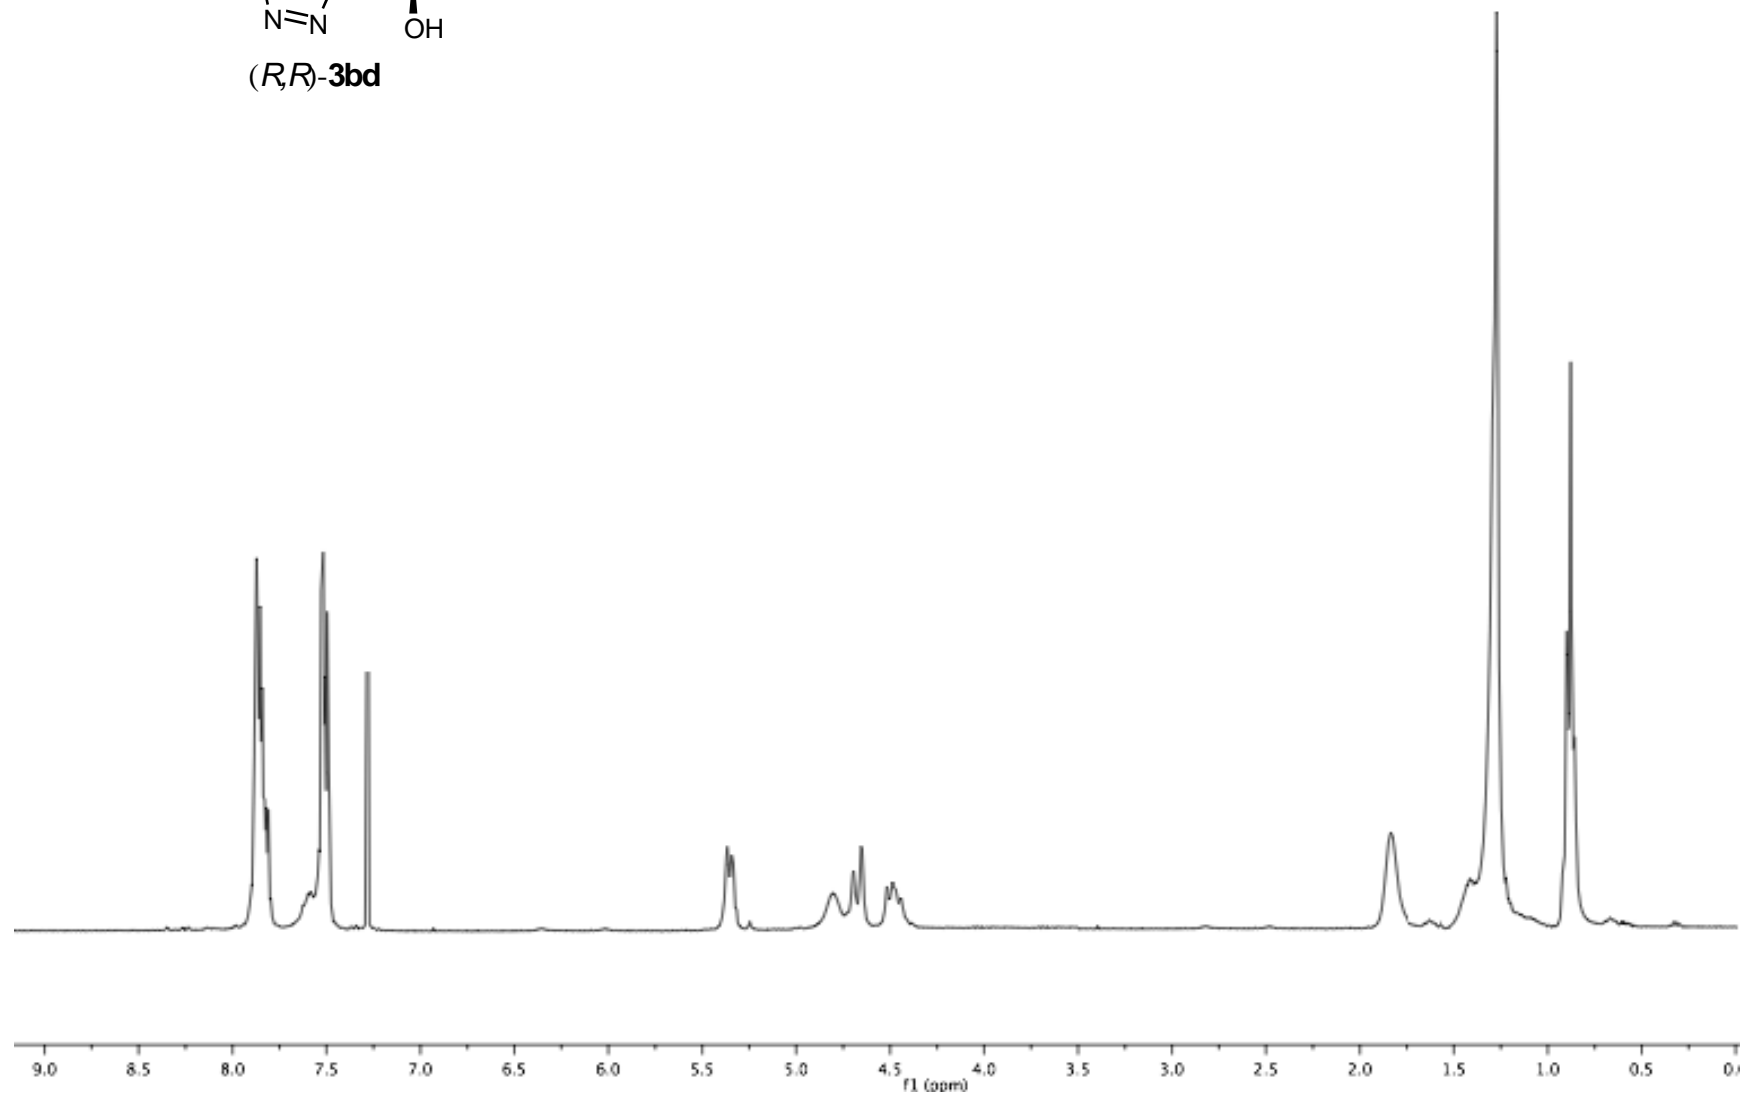

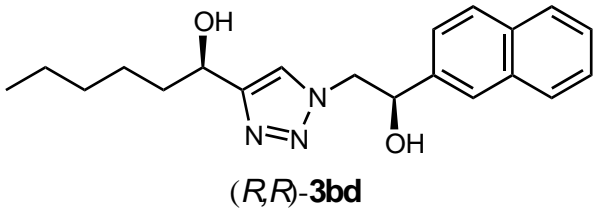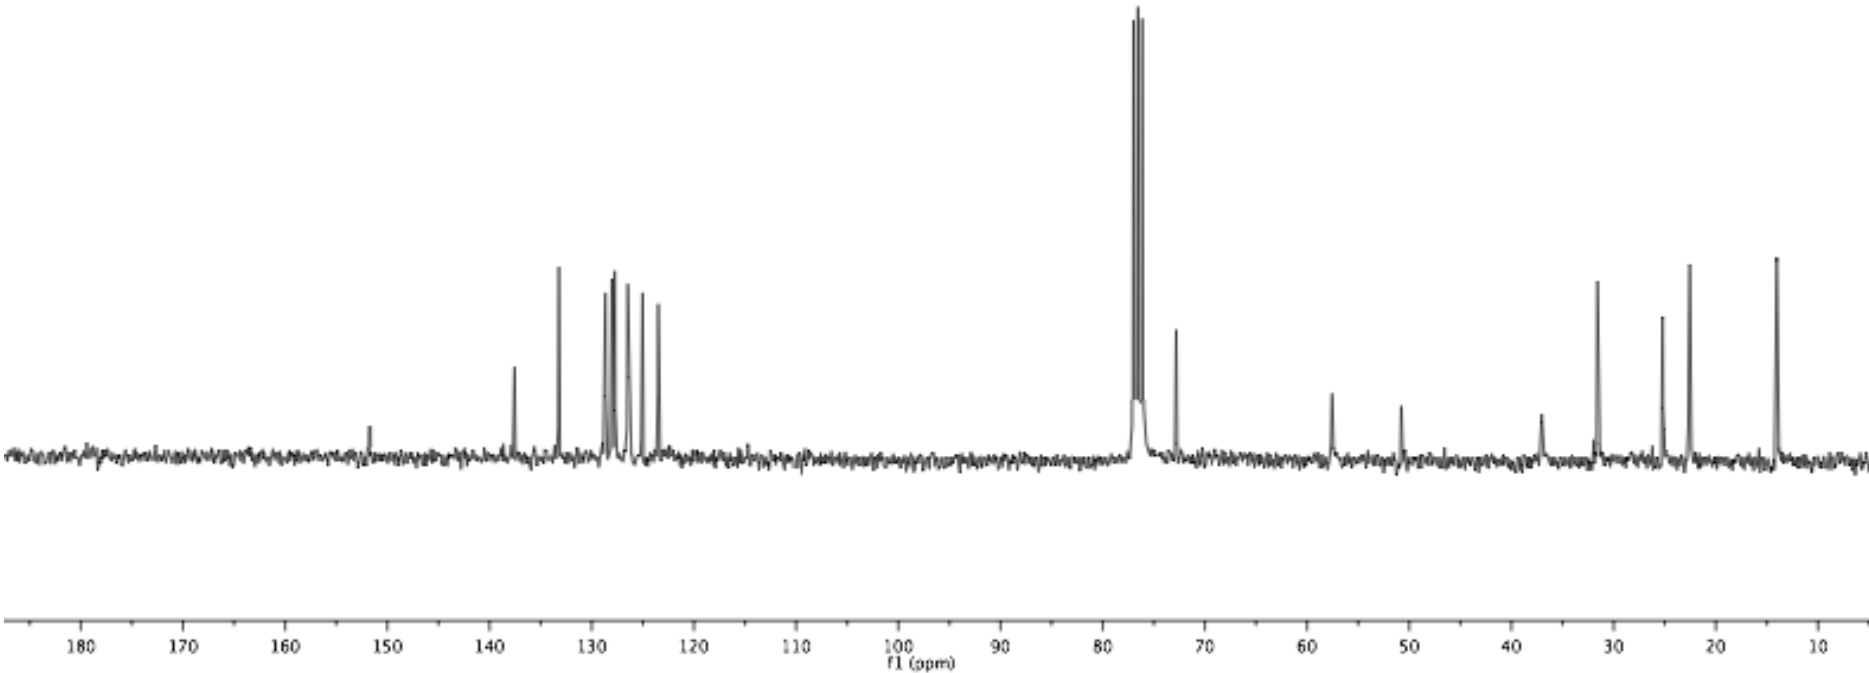

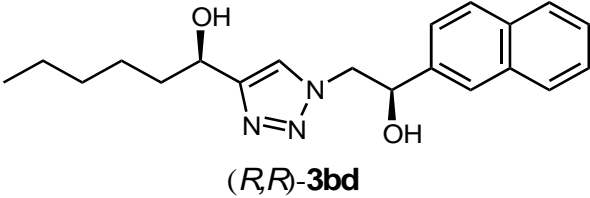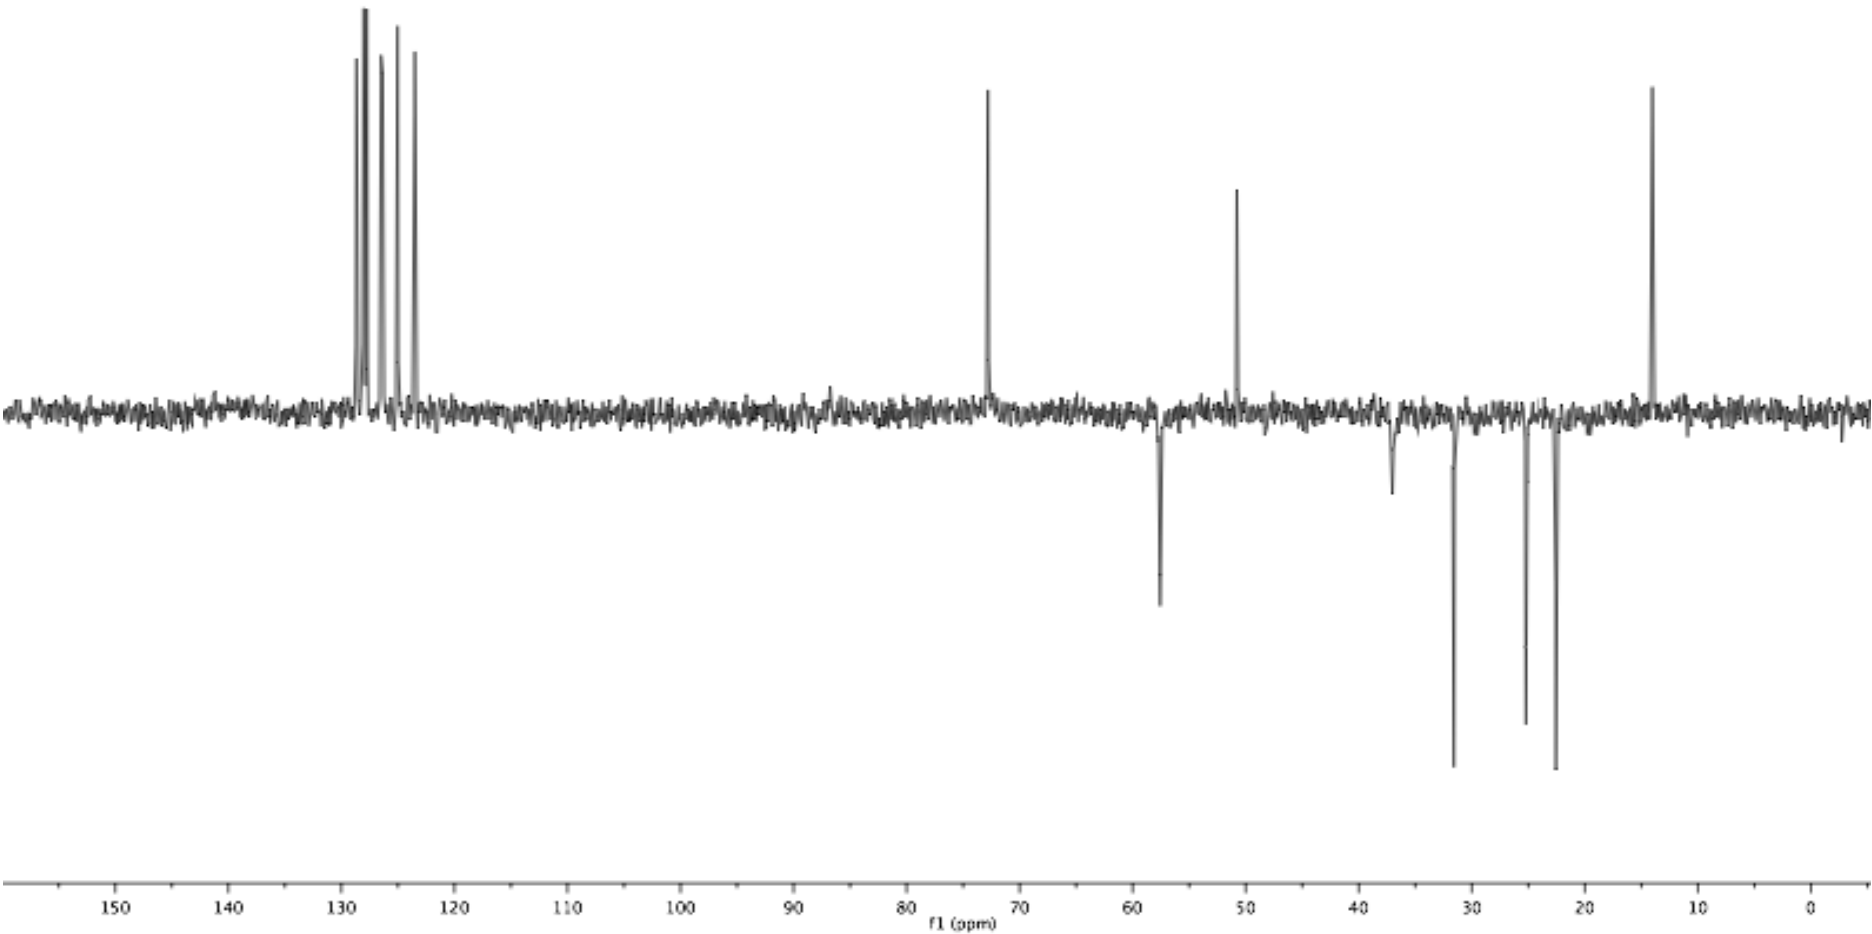

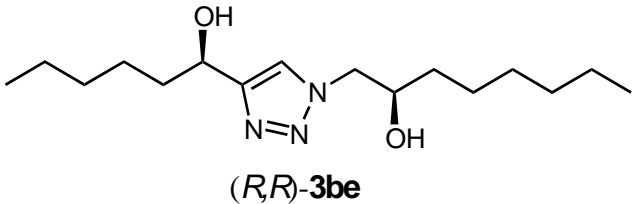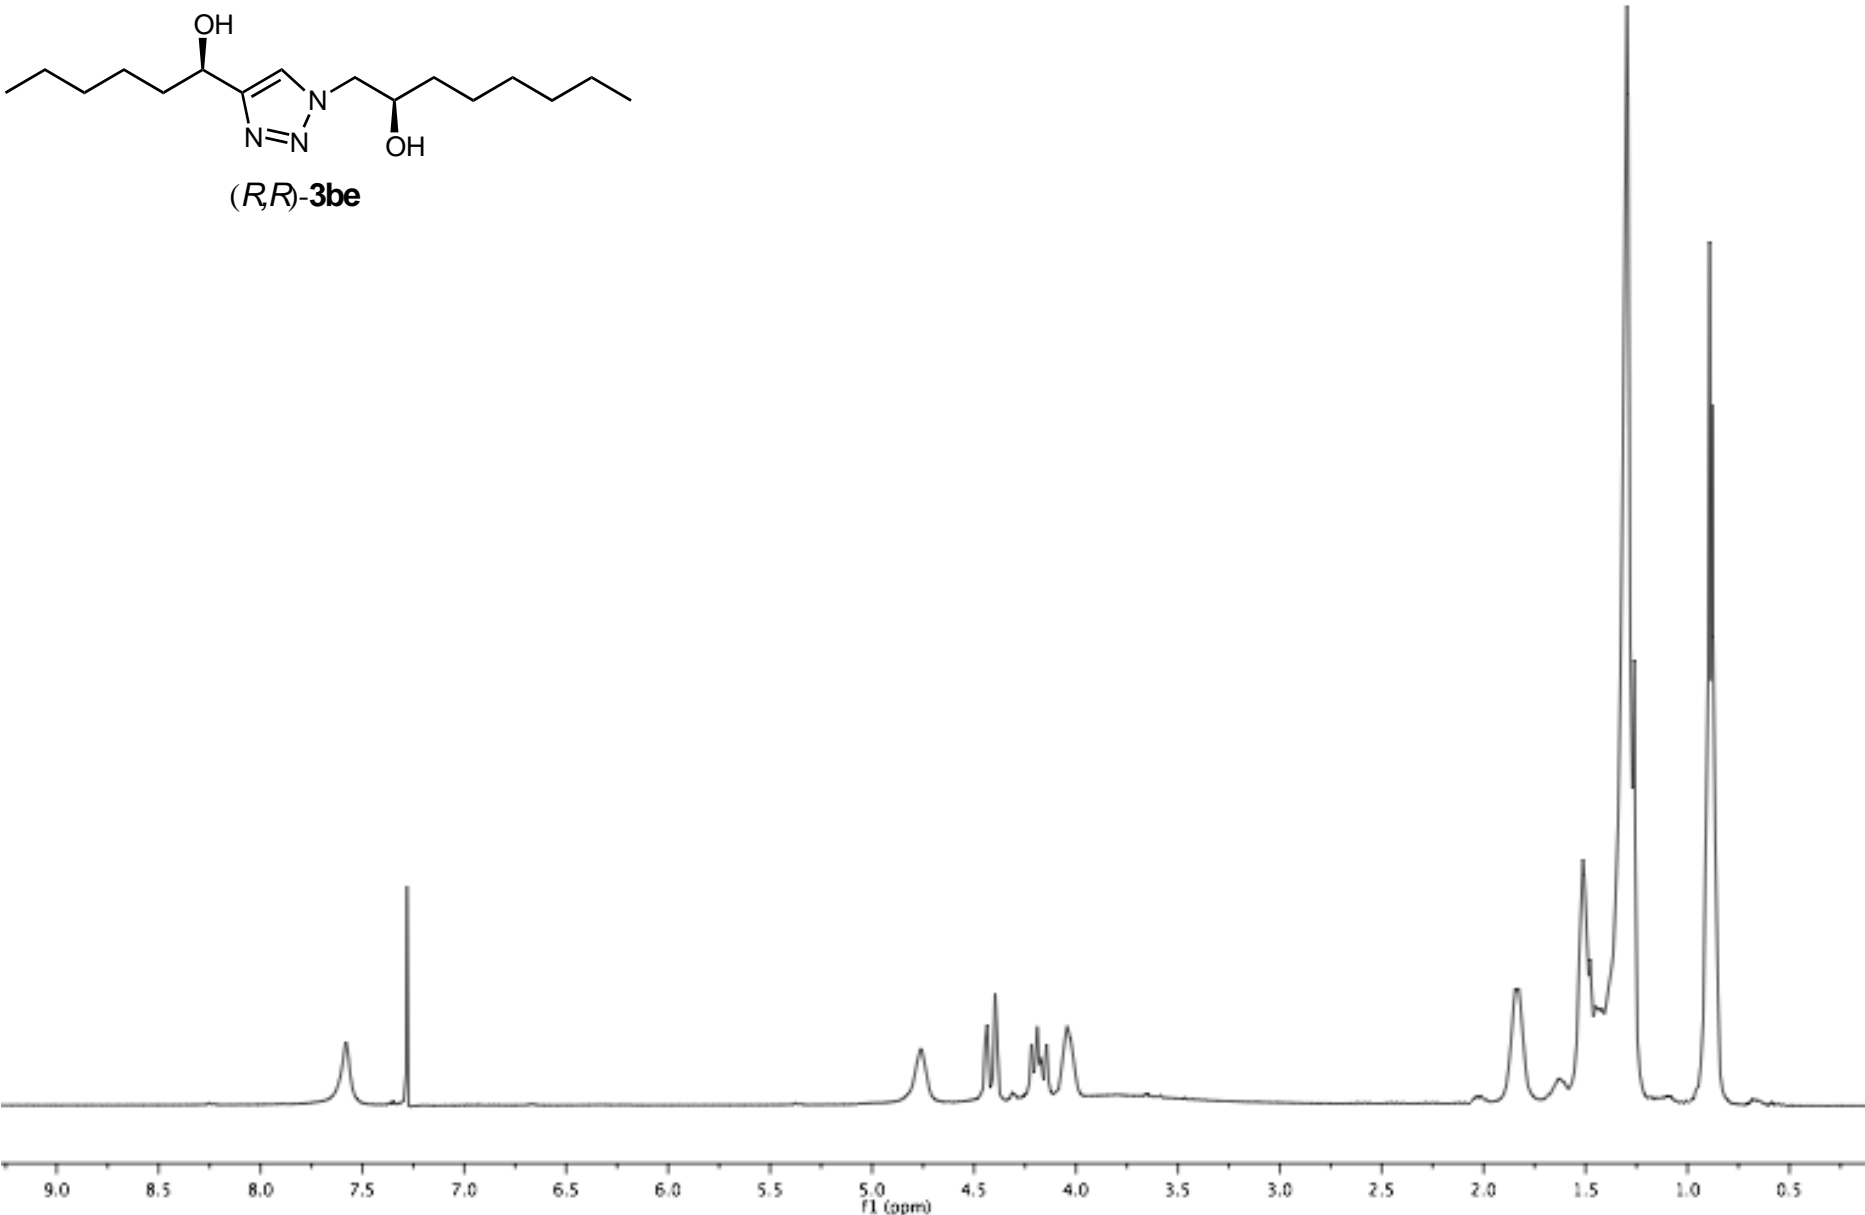

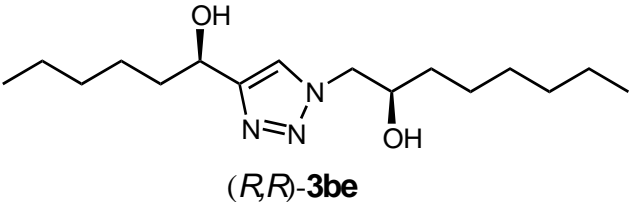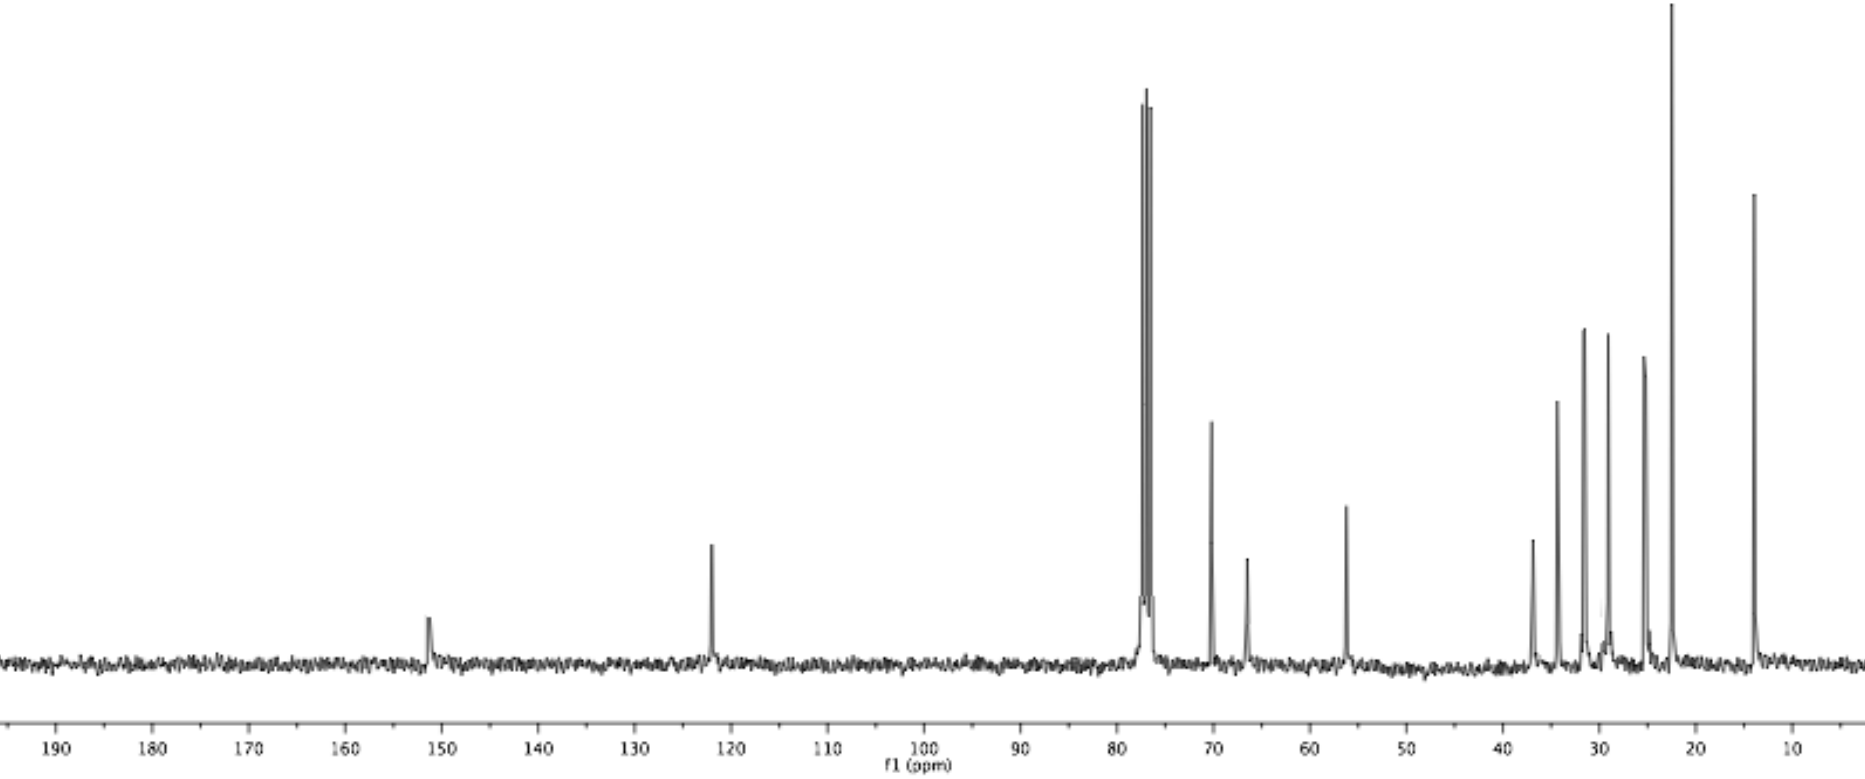



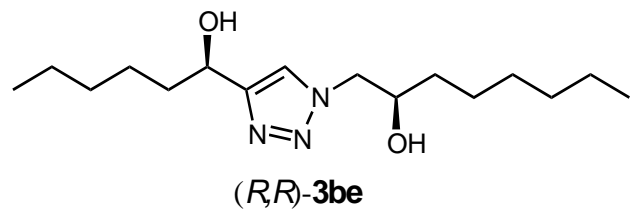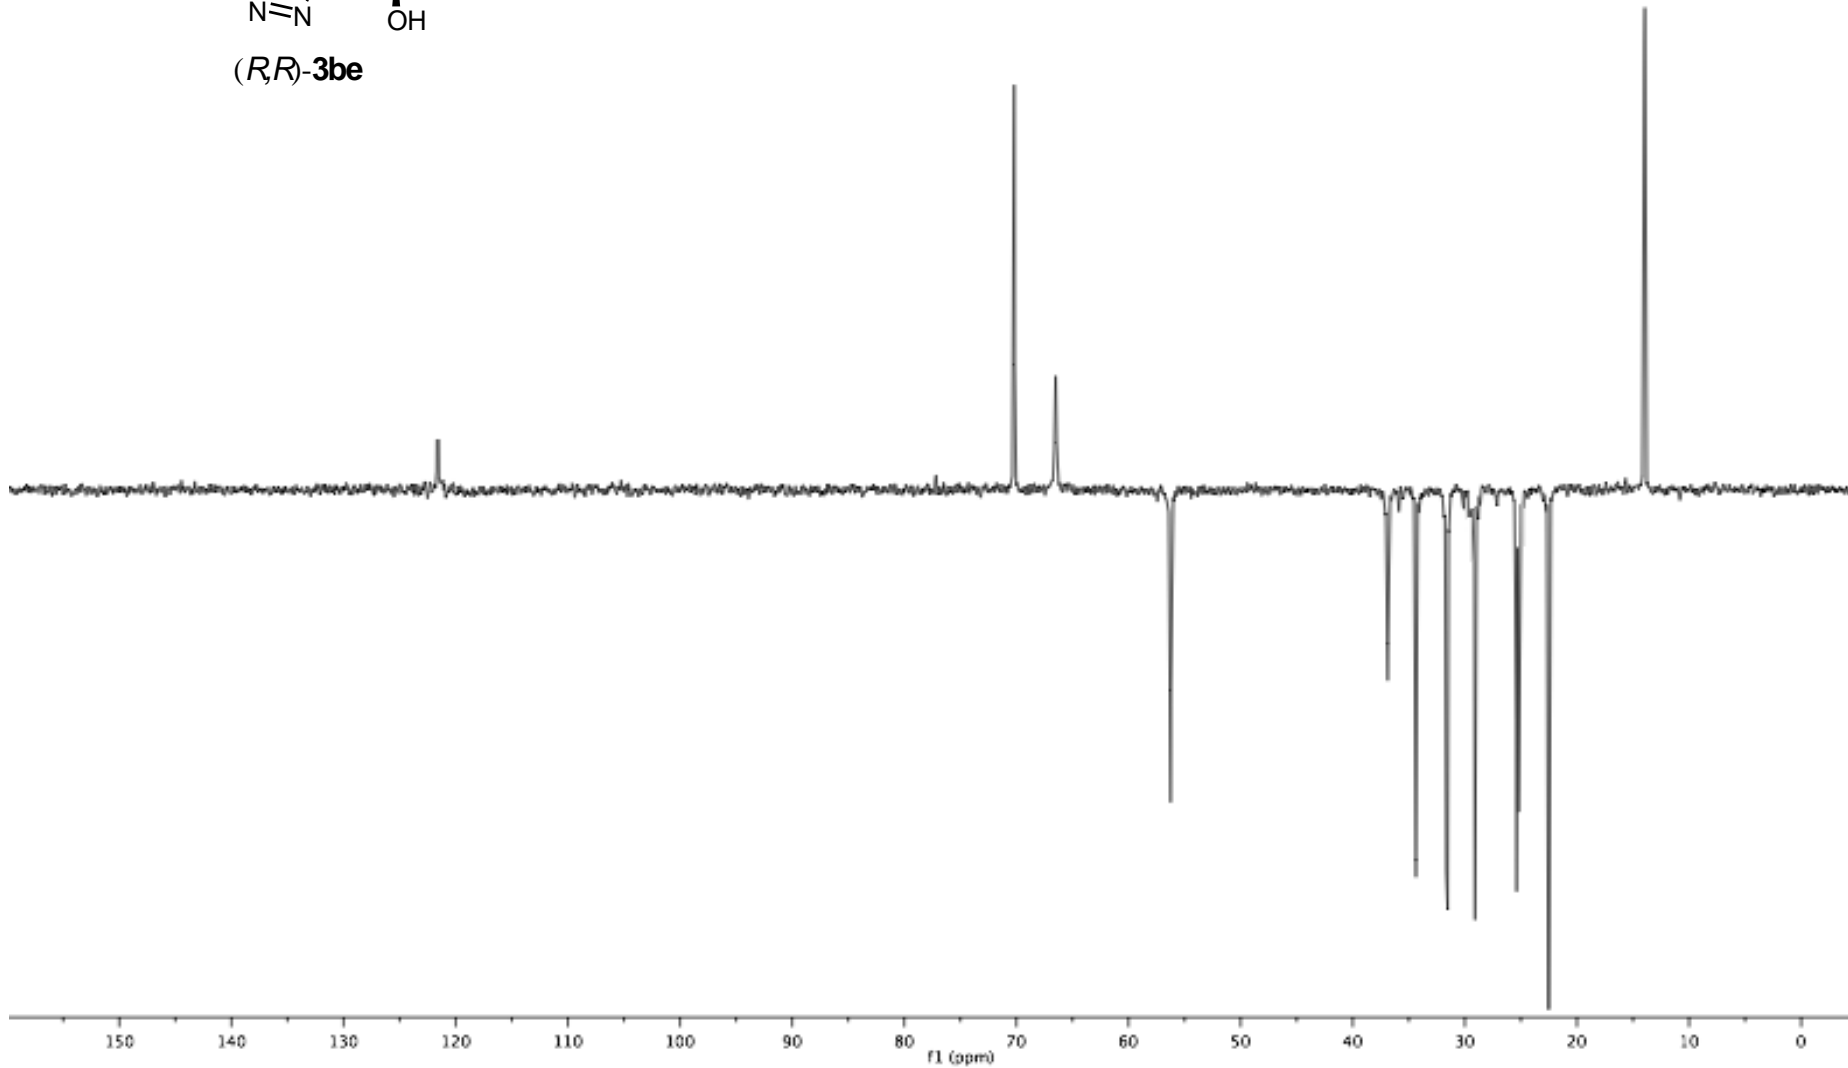

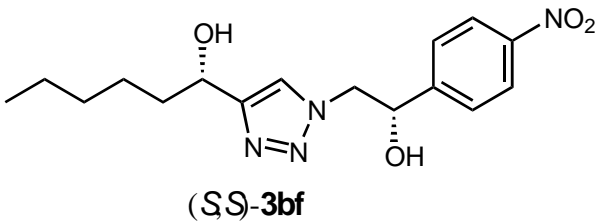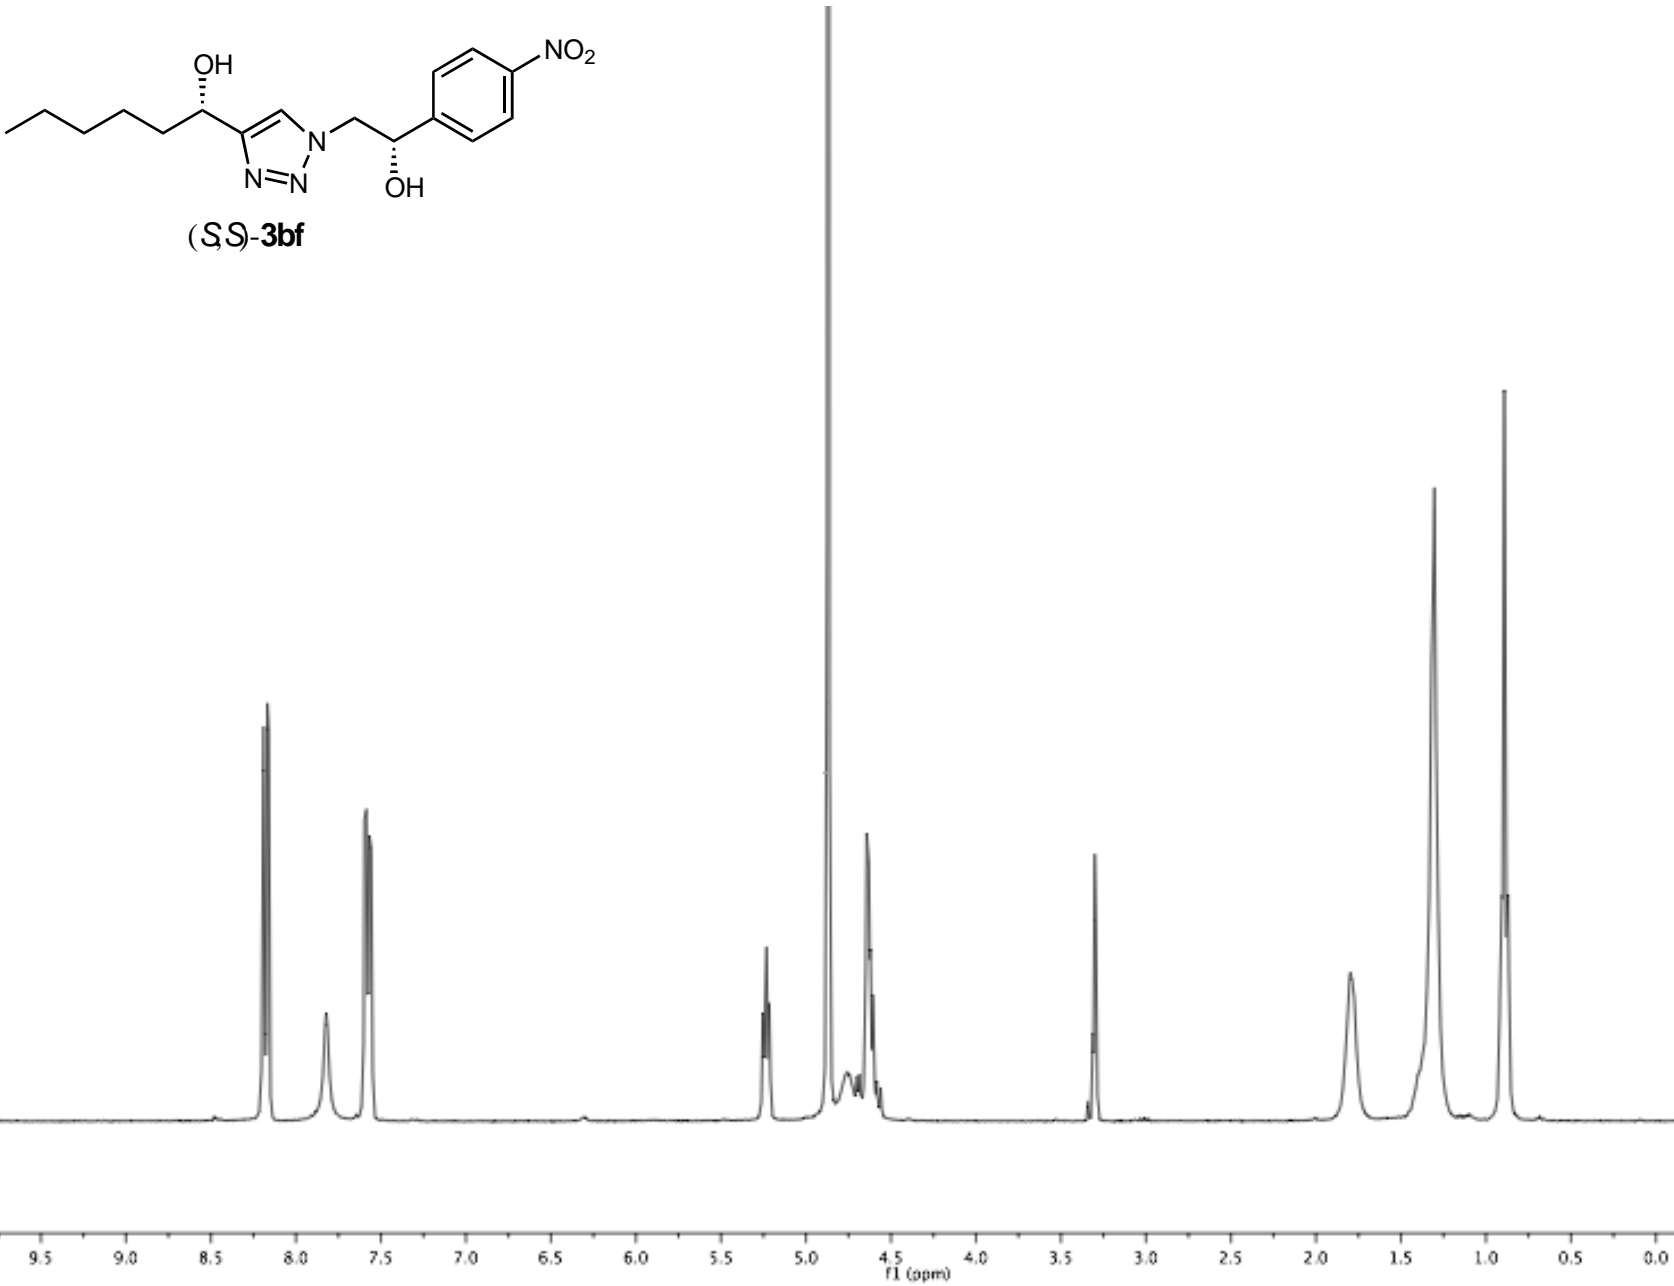

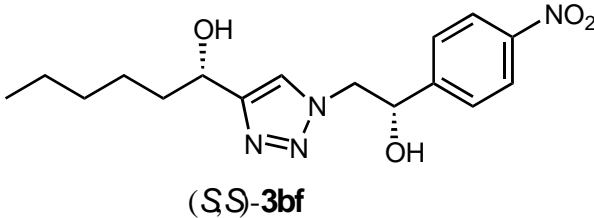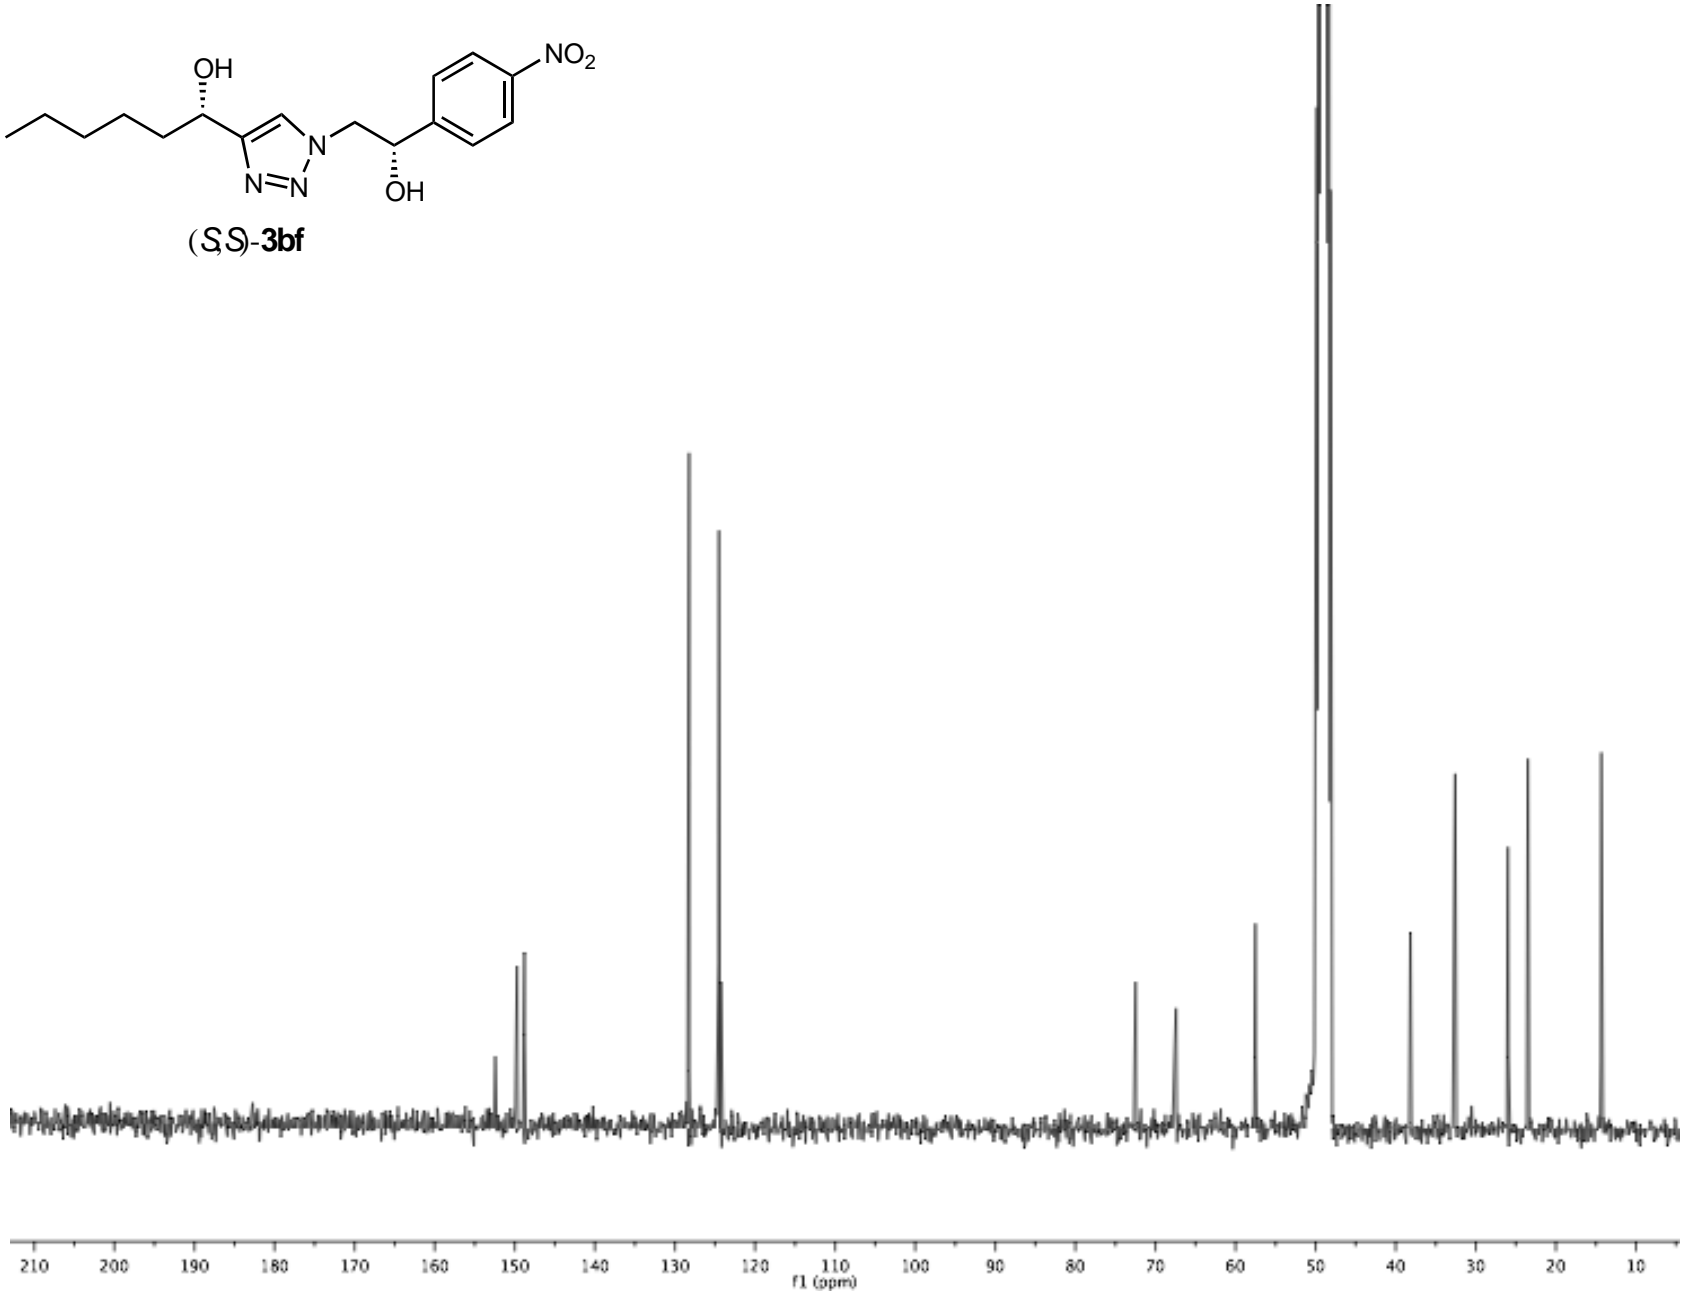

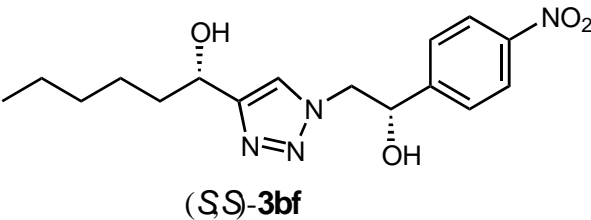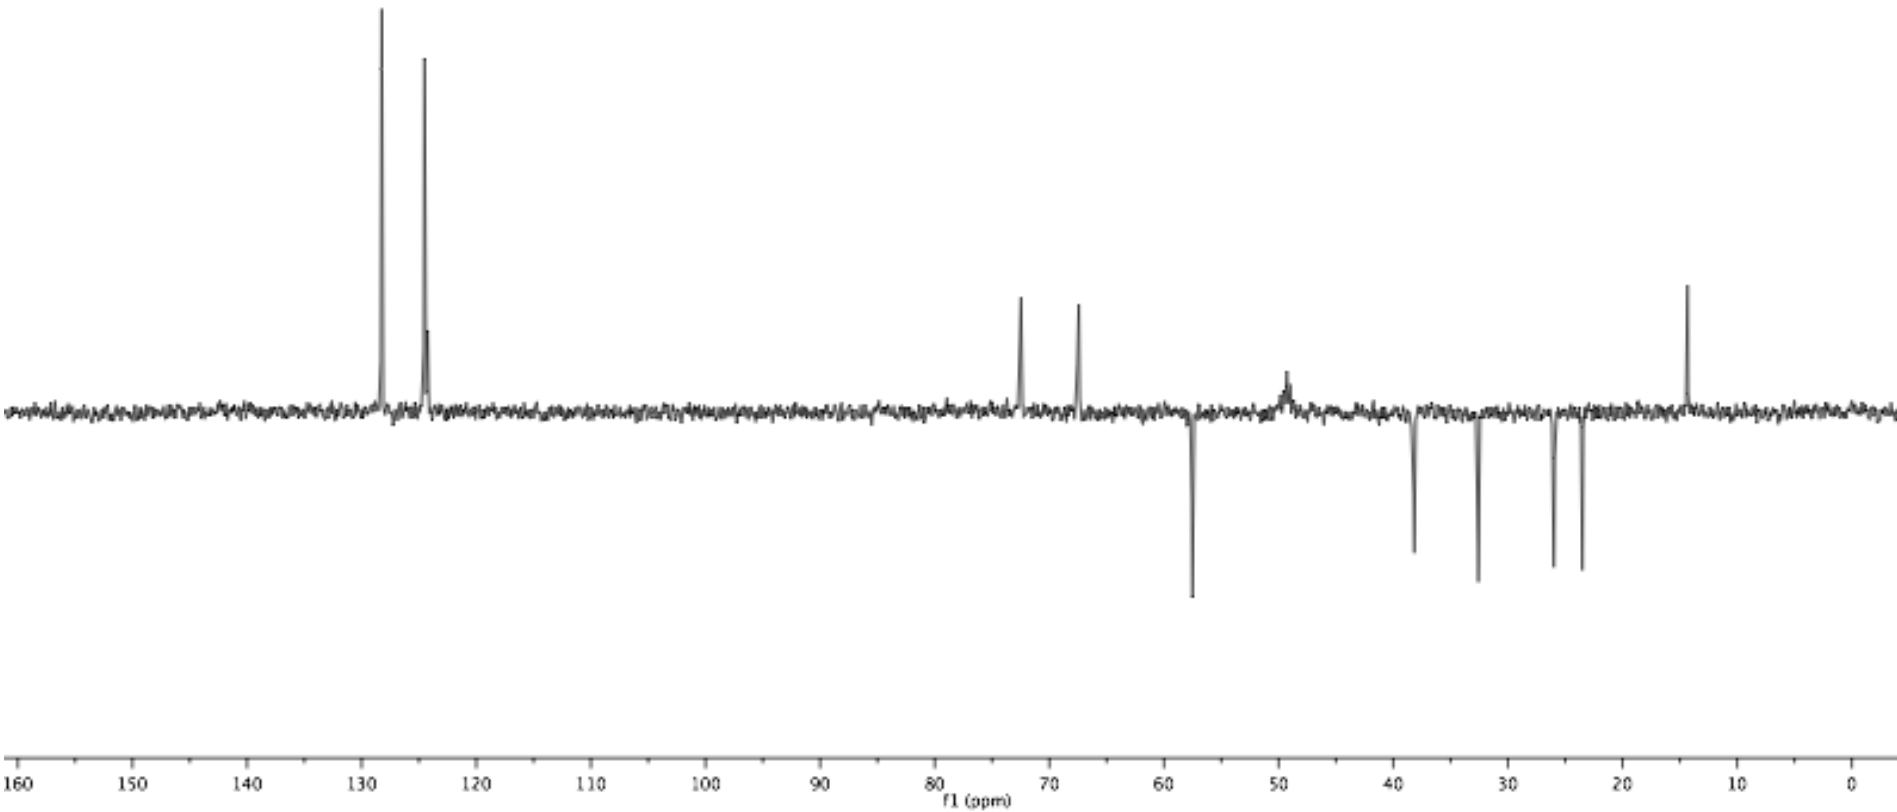

Supplement: c3cc38674k.pdf [file c3cc38674k.pdf]
